# Supplementary material for: The RNA cargo of Myxococcus outer membrane vesicles
Source: Royal Society of Chemistry journal article supplement (doi:10.1039/d3mo00222e), 2023-11-28
Supplement: d3mo00222e1.xlsx [file d3mo00222e1.xlsx]

## Sheet: nFPKMs
Normalised (%) FPKM values for transcripts mapped to DK1622 CDSs for OMV (duplicated) and cell samples.
	Myxococcus xanthus DK1622					Myxococcus xanthus AB022					Myxococcus xanthus CA010					Myxococcus stipitatus DSM14675
Identifier	OMV1	OMV2	Cell		Identifier	OMV1	OMV2	Cell		Identifier	OMV1	OMV2	Cell		Identifier	OMV1	OMV2	Cell
MXAN_2134	10.198	0	0.0240635		MXAN_2134	0	0	0		MXAN_2134	0	0	0		MXAN_2134	0	0	0
rpsU	4.4299	5.0123	0		rpsU	1.07903	0.143587	0.481966		rpsU	0	0	0.135338		rpsU	0	0	2.39905
MXAN_0457	3.97358	2.49485	0.0165955		MXAN_0457	0.570382	0.458416	0.282892		MXAN_0457	0	0	0.102336		MXAN_0457	0	0	0
MXAN_4815	3.43009	2.11922	7.56904		MXAN_4815	0.3325	0.294266	0.803699		MXAN_4815	2.66809	3.11024	2.22448		MXAN_4815	0	0	0
MXAN_5845	2.72254	0.604746	0		MXAN_5845	0.0436083	0.03829	0.017		MXAN_5845	0	0	0.00554665		MXAN_5845	0	0	0
rplL	2.25511	1.04385	0.0650544		rplL	0.38059	0.161314	0.328347		rplL	0.329451	0	0.447615		rplL	0	0	0.476829
MXAN_6535	1.83126	0	0.278141		MXAN_6535	0.0934103	0.181523	0.0964551		MXAN_6535	0	0	0.144768		MXAN_6535	0	0	0
rplW	1.69625	0	0.0436462		rplW	0.187526	0.24853	0.179147		rplW	0	0	0.371348		rplW	0	0	0
rplI	1.68172	0	0.0169274		rplI	0.178613	0.0712619	0.197554		rplI	0	0	0.130346		rplI	0	0	0
MXAN_4859	1.48432	1.32644	0.05908		MXAN_4859	0.102223	0.0836707	0.120632		MXAN_4859	0	0	0.0313386		MXAN_4859	0	0	0
MXAN_0934	1.45527	0.617788	0.0838073		MXAN_0934	0.172419	0.270512	0.0409238		MXAN_0934	1.51269	2.08661	0.736318		MXAN_0934	0	0	0
rpsC	1.44245	0	0.0355144		rpsC	0.180627	0.0804799	0.243038		rpsC	0.143845	0	0.28066		rpsC	0	0	0.178811
tuf(2)	1.41852	0.302808	0.352488		tuf(2)	0.295992	0.107779	0.263837		tuf(2)	0.928031	0	0.681961		tuf(2)	0	0	0.521532
ahpC	1.21942	1.07646	1.67681		ahpC	1.79267	2.52749	1.03283		ahpC	0.719224	3.38583	1.36531		ahpC	0	0	0.238415
MXAN_5088	1.08355	0	0.0267188		MXAN_5088	0.0456225	0.0308447	0.037687		MXAN_5088	0	0	0.0396585		MXAN_5088	0	0	0
rpsM	1.0562	0.971245	0.0648884		rpsM	0.216984	0.120543	0.175741		rpsM	0.31089	0	0.623166		rpsM	0	0	0
rpsD(1)	1.02202	0	1.02527		rpsD(1)	0.00231637	0	0.00253311		rpsD(1)	0	0	0.00415999		rpsD(1)	0	0	0
MXAN_0977	0.994676	0	0.8706		MXAN_0977	0.0144522	0.0276539	0.0283989		MXAN_0977	0	0	0.0352212		MXAN_0977	0	0	0
secG	0.992967	0	0.0486248		secG	0.0970359	0.0847343	0.0641439		secG	0.580019	0	0.097621		secG	0	0	0
MXAN_5561	0.992967	0	0.0121147		MXAN_5561	0	0.028363	0.017394		MXAN_5561	0	0	0.00887464		MXAN_5561	0	0	0
rpsI	0.981004	0	0.0718585		rpsI	0.0775985	0.0280084	0.106559		rpsI	0.575379	0	0.306175		rpsI	0	0	0
MXAN_3789	0.973313	0	0.077501		MXAN_3789	0.066067	0.0272993	0.147596		MXAN_3789	0.143845	0	0.119253		MXAN_3789	0	0	0
pilA	0.961349	0.41954	0.480274		pilA	0.067477	0.0535351	0.0958077		pilA	0	0	0.0568532		pilA	0	0	0
msrB	0.905805	0	0.0219061		msrB	0.0419465	0.0514079	0.0262599		msrB	0	0	0.0238506		msrB	0	0	0
MXAN_3790	0.898114	0	0.0557609		MXAN_3790	0.0446657	0.0499897	0.091417		MXAN_3790	0.134565	0	0.130069		MXAN_3790	0	0	0
rpsK	0.849406	0	0.0444759		rpsK	0.102021	0.0241085	0.173377		rpsK	0.250568	0	0.183594		rpsK	0	0	0.342721
MXAN_7502	0.849406	0	0.0122807		MXAN_7502	0.00392777	0.0241085	0.00379966		MXAN_7502	0	0	0.00721065		MXAN_7502	0	0	0
MXAN_2905	0.832315	0	0.0033191		MXAN_2905	0	0	0		MXAN_2905	0	0	0		MXAN_2905	0	0	0
MXAN_7475	0.816079	0	0.0818158		MXAN_7475	0.236975	0.0691347	0.202226		MXAN_7475	0	0	0.0698878		MXAN_7475	0	0	0
MXAN_0670	0.816079	0	0.0131104		MXAN_0670	0.0376159	0	0.116692		MXAN_0670	0	2.24409	0.0138666		MXAN_0670	0	0	0
MXAN_6978	0.798134	0	0.239971		MXAN_6978	0.00896336	0	0.0338592		MXAN_6978	0	0	0.0618451		MXAN_6978	0	0	0
MXAN_3201	0.798134	0	0.00763393		MXAN_3201	0.0072009	0	0.00515065		MXAN_3201	0	0	0.00915197		MXAN_3201	0	0	0
MXAN_3850	0.792152	0.711261	0.596276		MXAN_3850	0.196993	0.245694	0.0231076		MXAN_3850	0.232008	0	0.0876371		MXAN_3850	0	0	0
MXAN_5033	0.777625	0	0.453721		MXAN_5033	0.100158	0.0439626	0.199918		MXAN_5033	0.227368	0	0.145045		MXAN_5033	0	0	0
MXAN_1562	0.755407	0	0.201967		MXAN_1562	0.295237	0.468343	0.0311291		MXAN_1562	0.222727	0	0.210495		MXAN_1562	0	0	0
MXAN_6282	0.748571	0.669742	0.110526		MXAN_6282	0.0275447	0.0421899	0.00655793		MXAN_6282	0	0	0.0820904		MXAN_6282	0	0	0
MXAN_3639	0.740025	0	0.126624		MXAN_3639	0.00166175	0	0.00416555		MXAN_3639	0.111364	0	0.0171946		MXAN_3639	0	0	0
MXAN_1086	0.728917	0	0.0202465		MXAN_1086	0.0501545	0	0.0730379		MXAN_1086	0.213447	0	0.0427092		MXAN_1086	0	0	0
MXAN_6622	0.72208	0	0.0690373		MXAN_6622	0.0762389	0.0609804	0.280978		MXAN_6622	0.213447	0	0.0787624		MXAN_6622	0	0	0
MXAN_1366	0.710117	0	0.0225699		MXAN_1366	0	0	0.0172533		MXAN_1366	0	0	0		MXAN_1366	0	0	0
pdhC	0.68619	0	0.126956		pdhC	0.0946189	0.0521169	0.131693		pdhC	0.153125	0	0.182762		pdhC	0	0	0
MXAN_4524	0.669099	0	0.222546		MXAN_4524	0.122466	0.112743	0.077119		MXAN_4524	0.194887	0	0.30978		MXAN_4524	0	0	0
rplJ	0.663972	0	0.0630629		rplJ	0.200366	0.13047	0.17273		rplJ	0.389773	0	0.717737		rplJ	0	0	0
rpsE	0.663972	0	0.0419866		rpsE	0.273282	0.111679	0.273069		rpsE	0	0	0.180821		rpsE	0	0	0
MXAN_1563	0.658845	1.16819	1.10144		MXAN_1563	1.50544	1.40468	0.30386		MXAN_1563	0.969793	0	1.19419		MXAN_1563	0	0	0.506631
MXAN_7340	0.658845	0	0.0051446		MXAN_7340	0.0301129	0	0.105602		MXAN_7340	0	0	0.0163626		MXAN_7340	0	0	0
ccoP	0.64859	0	0.066548		ccoP	0.0148047	0	0.046581		ccoP	0	0	0.00526932		ccoP	0	0	0
era	0.619536	0	0.0248932		era	0.00417955	0	0.00515065		era	0	0	0.00471465		era	0	0	0
MXAN_4355	0.618682	0.546923	0.00248932		MXAN_4355	0	0.0173723	0.000534767		MXAN_4355	0	0	0		MXAN_4355	0	0	0
MXAN_5040	0.538356	0.152382	0.00414887		MXAN_5040	0.0742751	0.00992704	0.225644		MXAN_5040	0	0	0.00138666		MXAN_5040	0	0	0
clpP(1)	0.534083	0	0.194001		clpP(1)	0.147895	0.208822	0.0916985		clpP(1)	0	0	0.0427092		clpP(1)	0	0	0
MXAN_0458	0.530665	0	0.0393313		MXAN_0458	0.0939139	0.0592077	0.018548		MXAN_0458	0	0	0.0127573		MXAN_0458	0	0	0
MXAN_7089	0.523829	0	0.00813179		MXAN_7089	0.0380188	0	0.104955		MXAN_7089	0	0	0.01664		MXAN_7089	0	0	0
MXAN_6652	0.516992	0	0.0141062		MXAN_6652	0.0117329	0.014536	0.0163245		MXAN_6652	0.153125	0	0.0163626		MXAN_6652	0	0	0
groL(1)	0.49392	0.139557	0.691866		groL(1)	0.109826	0.154224	0.328122		groL(1)	1.28996	2.3622	0.537748		groL(1)	0	0	0.298018
MXAN_6758	0.489647	0	0.0132764		MXAN_6758	0.110833	0.163796	0.0242334		MXAN_6758	0	0	0.0501972		MXAN_6758	0	0	0
yfiA(1)	0.477684	0	0.0575864		yfiA(1)	0.051917	0.0265903	0.0829733		yfiA(1)	0.139205	0	0.0263466		yfiA(1)	0	0	0
MXAN_4672	0.477684	0	0.00564247		MXAN_4672	0.00866123	0	0.0306787		MXAN_4672	0	0	0.0113706		MXAN_4672	0	0	0
MXAN_5921	0.474266	0	0.187363		MXAN_5921	0.0857562	0.0918251	0.012947		MXAN_5921	0	0	0.0759891		MXAN_5921	0	0	0
MXAN_2290	0.460593	0	0.00116168		MXAN_2290	0.00684841	0.0212722	0.0342251		MXAN_2290	0	0	0.00110933		MXAN_2290	0	0	0
pckG	0.44863	0	0.10256		pckG	0.132285	0.189323	0.252129		pckG	0.176326	0.433071	0.0820904		pckG	0	0	0
MXAN_2597	0.444357	0	0.0275485		MXAN_2597	0.0080066	0	0.0105265		MXAN_2597	0	0	0.00693331		MXAN_2597	0	0	0.16391
MXAN_1509	0.441793	0	0		MXAN_1509	0.0080066	0.0737437	0.00650164		MXAN_1509	0	0	0		MXAN_1509	0	0	0
hutI	0.440939	0	0.00912752		hutI	0.00100712	0	0.0054884		hutI	0	0	0.00332799		hutI	0	0	0
hisS	0.436666	0	0.0116168		hisS	0.0146032	0.00602713	0.0140728		hisS	0	0	0.0130346		hisS	0	0	0
MXAN_6483	0.430685	0	0.284447		MXAN_6483	0.0189338	0	0.0143261		MXAN_6483	0	0	0.01664		MXAN_6483	0	0	0
MXAN_3697	0.425557	0	0.0033191		MXAN_3697	0.0576576	0.142169	0.00242052		MXAN_3697	0	0	0.00332799		MXAN_3697	0	0	0
MXAN_3437	0.417012	0	0.00647224		MXAN_3437	0.00186317	0	0.00270198		MXAN_3437	0	0	0.00332799		MXAN_3437	0	0	0
MXAN_0211	0.412739	0	0.0238975		MXAN_0211	0.0279476	0.0343901	0.0642846		MXAN_0211	0	0	0.0546345		MXAN_0211	0	0	0
MXAN_7203	0.412739	0.358022	0.0127785		MXAN_7203	0.0744765	0.355955	0.0411771		MXAN_7203	0.120644	0	0.0191359		MXAN_7203	0	0	0
mrpC	0.412739	0	0.0653863		mrpC	0.245787	0.29852	0.0622581		mrpC	0	0	0.00970664		mrpC	0	0	0
socA	0.412739	0	0.0142721		socA	0	0	0.000675495		socA	0	0	0		socA	0	0	0
MXAN_1919	0.411885	0	0.00315314		MXAN_1919	0.00367599	0.00567259	0.00430628		MXAN_1919	0	0	0		MXAN_1919	0	0	0
MXAN_5152	0.41103	0.356283	0.0237316		MXAN_5152	0.040738	0.0343901	0.232398		MXAN_5152	0	0	0.0574078		MXAN_5152	0	0	0
MXAN_3534	0.408467	0	0.208274		MXAN_3534	0.0165671	0.0226904	0.0198708		MXAN_3534	0	0	0.0856957		MXAN_3534	0	0	0
tgl	0.402485	0	0.010953		tgl	0.00543844	0.0113452	0.00911919		tgl	0	1.14173	0		tgl	0	0	0
kamE	0.387958	0	0.0149359		kamE	0.0139486	0.0216268	0.0481009		kamE	0	0	0.0180266		kamE	0	0	0
MXAN_4531	0.387958	0	0.00298719		MXAN_4531	0	0	0.00875329		MXAN_4531	0	0	0		MXAN_4531	0	0	0
MXAN_1624	0.387103	0	0.070199		MXAN_1624	0.0525716	0.0478625	0.213316		MXAN_1624	0.171686	0	0.101504		MXAN_1624	0	0	0
MXAN_0881	0.383685	0	0.00298719		MXAN_0881	0	0	0.000619204		MXAN_0881	0	0	0.00582398		MXAN_0881	0	0	0
MXAN_5846	0.380267	0	0.0131104		MXAN_5846	0.0154089	0.0421899	0.0107235		MXAN_5846	0	0	0.0146986		MXAN_5846	0	0	0
mbhA	0.376849	0	0.00149359		mbhA	0.0101719	0	0.00090066		mbhA	0	0	0		mbhA	0	0	0
MXAN_6013	0.370013	0	0.00431483		MXAN_6013	0.00332349	0.0102816	0.00298344		MXAN_6013	0	0	0.00277333		MXAN_6013	0	0	0
MXAN_4327	0.35634	0.454103	0.108369		MXAN_4327	0.0801163	0.00496352	0.501808		MXAN_4327	0.213447	0	0.0812584		MXAN_4327	0	0	0.0596036
MXAN_5892	0.352922	0	0.00813179		MXAN_5892	0.0269404	0.0194995	0.0155082		MXAN_5892	0	0	0.010816		MXAN_5892	0	0	0
MXAN_6196	0.347795	0.299982	0.0481269		MXAN_6196	0.128206	0.0386445	0.261417		MXAN_6196	0.102083	0	0.0690558		MXAN_6196	0	0	0
panC	0.338395	0	0.0180891		panC	0.0212502	0.0375809	0.00917548		panC	0	0	0.00249599		panC	0	0	0
MXAN_6426	0.334122	0	0		MXAN_6426	0	0	0		MXAN_6426	0	0	0		MXAN_6426	0	0	0
MXAN_4650	0.332413	0	0.0229018		MXAN_4650	0.019387	0	0.0317764		MXAN_4650	0	0	0.00499199		MXAN_4650	0	0	0
groL(2)	0.328141	0.278244	0.794261		groL(2)	0.160434	0.130824	0.605244		groL(2)	3.01146	2.3622	2.55978		groL(2)	0	0	0.178811
htpX	0.32045	0.275853	0.492223		htpX	0.0330839	0.0354537	0.212753		htpX	0	0	0.185258		htpX	0	0	0
MXAN_2251	0.316177	0	0.0169274		MXAN_2251	0.00281993	0.00886343	0.00925991		MXAN_2251	0	0	0.00249599		MXAN_2251	0	0	0
mdh	0.310195	0	0.158819		mdh	0.104186	0.0514079	0.458886		mdh	0.273769	0	0.216042		mdh	0	0	0
MXAN_0201	0.310195	0	0.00829775		MXAN_0201	0.00276958	0	0.00759932		MXAN_0201	0	0	0		MXAN_0201	0	0	0
MXAN_6184	0.307632	0	0.00829775		MXAN_6184	0.0151571	0	0.0343377		MXAN_6184	0	0	0		MXAN_6184	0	0	0
MXAN_4860	0.300796	0.516273	0.0643905		MXAN_4860	0.103733	0.0914705	0.591509		MXAN_4860	0	0	0.0612905		MXAN_4860	0	0	0
pdhB	0.293959	0	0.198814		pdhB	0.117279	0.0163087	0.262345		pdhB	0.259849	0	0.157802		pdhB	0	0	0
MXAN_1302	0.288832	0	0.00779988		MXAN_1302	0.00130926	0.00815435	0.0159586		MXAN_1302	0.171686	0	0.00665598		MXAN_1302	0	0	0
dnaK(1)	0.279432	0.354544	1.29345		dnaK(1)	0.115366	0.199959	0.31768		dnaK(1)	0.955872	1.61417	0.666153		dnaK(1)	0	0	0.298018
MXAN_1074	0.279432	0	0.0170934		MXAN_1074	0.0100208	0.00779981	0.0206589		MXAN_1074	0	0	0.00415999		MXAN_1074	0	0	0
MXAN_4945	0.277723	0	0.01477		MXAN_4945	0.00498524	0.0152451	0.00174503		MXAN_4945	0	0	0.01248		MXAN_4945	0	0	0
MXAN_5582	0.273451	0	0.472308		MXAN_5582	0.111387	0.128697	0.108839		MXAN_5582	1.05796	1.5748	0.532756		MXAN_5582	0	0	0.104306
MXAN_7199	0.273451	0.231073	0.114177		MXAN_7199	0.0242716	0.0301356	0.0928524		MXAN_7199	0.0417614	0	0.0130346		MXAN_7199	0	0	0
MXAN_4565	0.270887	0	0.0692032		MXAN_4565	0.0605782	0.0223358	0.138364		MXAN_4565	0	0	0.0812584		MXAN_4565	0	0	0
MXAN_6306	0.269178	0	0.0389994		MXAN_6306	0.0301129	0.0148906	0.0894187		MXAN_6306	0	0	0		MXAN_6306	0	0	0
MXAN_0088	0.267469	0	0.00199146		MXAN_0088	0.00236673	0	0.00211092		MXAN_0088	0	0	0.00194133		MXAN_0088	0	0	0
MXAN_4295	0.264905	0	0.103888		MXAN_4295	0.0663188	0.00744528	0.255534		MXAN_4295	0.157765	0.748031	0.182762		MXAN_4295	0	0	0
sasN	0.261487	0	0.00099573		sasN	0.00699948	0.00709074	0.00163245		sasN	0	0	0.00776531		sasN	0	0	0
MXAN_1651	0.259778	0	0.010953		MXAN_1651	0.00231637	0	0.0156771		MXAN_1651	0	0	0		MXAN_1651	0	0	0
ald	0.252942	0	0.0230677		ald	0.0281993	0.0280084	0.0741075		ald	0.0742425	0	0.0396585		ald	0	0	0
fusA(2)	0.250378	0.105863	0.0469653		fusA(2)	0.0711026	0.0723256	0.128119		fusA(2)	0.222727	0.354331	0.1456		fusA(2)	0	0	0.178811
MXAN_3272	0.250378	0	0.00381696		MXAN_3272	0.00221566	0.0067362	0.000394039		MXAN_3272	0	0	0		MXAN_3272	0	0	0
MXAN_5133	0.246105	0.20977	0.00099573		MXAN_5133	0.00327314	0.0202086	0.000197019		MXAN_5133	0	0	0		MXAN_5133	0	0	0
metK	0.236706	0.201727	0.00265528		metK	0.0390762	0.0262357	0.0313542		metK	0	0	0.00526932		metK	0	0	0
MXAN_4685	0.234997	0	0.00365101		MXAN_4685	0.00211495	0.00638167	0.014495		MXAN_4685	0	0	0.001664		MXAN_4685	0	0	0
serB	0.234142	0	0.0132764		serB	0.00211495	0.00638167	0.00841554		serB	0	0	0		serB	0	0	0
MXAN_1234	0.231578	0	0.0272166		MXAN_1234	0	0	0		MXAN_1234	0	0	0		MXAN_1234	0	0	0
MXAN_4905	0.230724	0	0.0018255		MXAN_4905	0.00513631	0	0.00394039		MXAN_4905	0	0	0.00526932		MXAN_4905	0	0	0
MXAN_0212	0.229869	0.196075	0.447415		MXAN_0212	0.187727	0.114161	0.469131		MXAN_0212	0	0	0.0291199		MXAN_0212	0	0	0
aceA	0.216197	0	0.0902795		aceA	0.118739	0.119479	0.00402483		aceA	0.0649622	0	0.0626771		aceA	0	0	0
icd	0.214488	0	0.0730202		icd	0.104136	0.0471534	0.299104		icd	0.190246	0.629921	0.117589		icd	0	0	0.0745045
MXAN_6091	0.213633	0	0		MXAN_6091	0.00478382	0	0.00312417		MXAN_6091	0	0	0		MXAN_6091	0	0	0
MXAN_3215	0.21107	0	0.00315314		MXAN_3215	0.00281993	0.0173723	0.00360264		MXAN_3215	0	0	0.001664		MXAN_3215	0	0	0
MXAN_6263	0.208506	0	0.178734		MXAN_6263	0.0418962	0.0287175	0.0511406		MXAN_6263	0	0	0.0324479		MXAN_6263	0	0	0
MXAN_7164	0.208506	0.177163	0.0584162		MXAN_7164	0.0092655	0.0173723	0.0493956		MXAN_7164	0	0	0		MXAN_7164	0	0	0
MXAN_0452	0.207651	0.530402	0.182385		MXAN_0452	0.0527731	0.0687802	0.292658		MXAN_0452	0.617141	0	0.352212		MXAN_0452	0	0	0.372523
MXAN_4196	0.204233	0	0		MXAN_4196	0.00271922	0.00567259	0.00109768		MXAN_4196	0	0	0.00138666		MXAN_4196	0	0	0
MXAN_6248	0.195688	0	0.00746797		MXAN_6248	0.0104237	0.00531806	0.0516472		MXAN_6248	0	0	0.00443732		MXAN_6248	0	0	0
MXAN_0884	0.193124	0	0		MXAN_0884	0.0017121	0	0.00135099		MXAN_0884	0	0	0		MXAN_0884	0	0	0
MXAN_1743	0.191415	0	0.00580842		MXAN_1743	0.0017121	0.00531806	0.018745		MXAN_1743	0.0556819	0	0.0238506		MXAN_1743	0	0	0
MXAN_0656	0.191415	0	0.00580842		MXAN_0656	0	0.00531806	0.00267384		MXAN_0656	0	0	0		MXAN_0656	0	0	0
MXAN_3786	0.184579	0	0.00215741		MXAN_3786	0.000805695	0	0.00484105		MXAN_3786	0	0	0.00277333		MXAN_3786	0	0	0
MXAN_3130	0.184579	0	0.00414887		MXAN_3130	0	0	0.00171688		MXAN_3130	0	0	0.00138666		MXAN_3130	0	0	0
MXAN_0362	0.179452	0	0.0233997		MXAN_0362	0	0	0.00045033		MXAN_0362	0	0	0		MXAN_0362	0	0	0
MXAN_2285	0.178597	0	0.00199146		MXAN_2285	0	0	0.00315231		MXAN_2285	0	0	0.00138666		MXAN_2285	0	0	0
MXAN_6574	0.176888	0.149991	0.358463		MXAN_6574	0.0849505	0.0439626	0.531755		MXAN_6574	0.0510417	0	0.323647		MXAN_6574	0	0	0
MXAN_7320	0.171761	0	0.00448078		MXAN_7320	0.00307171	0.0187905	0.00132284		MXAN_7320	0	0	0.0113706		MXAN_7320	0	0	0
pgi	0.170907	0	0.00896157		pgi	0.0258326	0.028363	0.0149735		pgi	0	0	0.0113706		pgi	0	0	0
atpA	0.163216	0	0.0350165		atpA	0.0514638	0.0315538	0.108895		atpA	0.143845	0	0.0740478		atpA	0	0	0.238415
pruA	0.163216	0	0.0190848		pruA	0.0297604	0.0134724	0.0408956		pruA	0	0	0.0155306		pruA	0	0	0
ctaD(2)	0.161507	0.274331	0.0506163		ctaD(2)	0.0309186	0.0265903	0.216018		ctaD(2)	0	0.472441	0.0391039		ctaD(2)	0	0	0.119207
MXAN_0218	0.153816	0	0		MXAN_0218	0.00135961	0	0.00101324		MXAN_0218	0	0	0		MXAN_0218	0	0	0
MXAN_1450	0.151252	0.445625	0.391654		MXAN_1450	0.0689877	0.0102816	0.317342		MXAN_1450	0.134565	0.23622	0.0554665		MXAN_1450	0	0	0.0596036
MXAN_7509	0.147834	0	0.00215741		MXAN_7509	0.00921514	0.00815435	0.00793707		MXAN_7509	0	0	0.00443732		MXAN_7509	0	0	0
hscA	0.145271	0	0.00497865		hscA	0.00513631	0.00779981	0.00309602		hscA	0	0	0.011648		hscA	0	0	0
ftsH(2)	0.139289	0	0.0633948		ftsH(2)	0.0914968	0.11877	0.0672118		ftsH(2)	0.250568	0	0.165568		ftsH(2)	0	0	0
MXAN_3705	0.123907	0	0.00282123		MXAN_3705	0.00881229	0.0067362	0.00500992		MXAN_3705	0	0	0		MXAN_3705	0	0	0
glgX(2)	0.123053	0	0.00564247		glgX(2)	0.0054888	0.00354537	0.00591058		glgX(2)	0.0371212	0	0.00443732		glgX(2)	0	0	0
MXAN_3571	0.122198	0	0.0585821		MXAN_3571	0.00322278	0	0.00686753		MXAN_3571	0.0371212	0	0.0221866		MXAN_3571	0	0	0
rpoC	0.121344	0.203466	0.178734		rpoC	0.0698437	0.081189	0.11717		rpoC	0.236648	0.15748	0.267626		rpoC	0	0	0.0447027
MXAN_6601	0.120489	0	0.0149359		MXAN_6601	0.0165671	0.0067362	0.0986504		MXAN_6601	0.0371212	0	0.0377172		MXAN_6601	0	0	0.0894055
MXAN_1389	0.11878	0.300199	0.0116168		MXAN_1389	0.0183799	0.00638167	0.083874		MXAN_1389	0	0	0.0110933		MXAN_1389	0	0	0
fibA	0.117926	0	0.210431		fibA	0.0387237	0.0194995	0.0495926		fibA	0.914111	0.669291	0.659219		fibA	0	0	0
cas3(2)	0.117926	0	0.0018255		cas3(2)	0	0	0.000168874		cas3(2)	0	0	0.000831998		cas3(2)	0	0	0
MXAN_3917	0.111089	0	0.00066382		MXAN_3917	0.00025178	0.00141815	0.00045033		MXAN_3917	0	0	0.00194133		MXAN_3917	0	0	0
pkn2	0.105108	0	0.00348505		pkn2	0.00276958	0	0.00391224		pkn2	0	0	0.00443732		pkn2	0	0	0
clpB(1)	0.0991258	0.0836906	0.139734		clpB(1)	0.0506077	0.0599168	0.0815098		clpB(1)	0.0278409	0	0.0357759		clpB(1)	0	0	0
acnA	0.0957077	0.321285	0.0285443		acnA	0.103431	0.0943068	0.196766		acnA	0.143845	0	0.0571305		acnA	0	0	0.0298018
MXAN_4680	0.0957077	0	0.00066382		MXAN_4680	0.00634485	0.00248176	0.00309602		MXAN_4680	0	0	0.00194133		MXAN_4680	0	0	0
secA	0.0922895	0	0.0521099		secA	0.0338392	0.0453807	0.0545462		secA	0.0278409	0	0.0299519		secA	0	0	0.0596036
MXAN_5557	0.0871624	0	0.0622331		MXAN_5557	0.00805695	0	0.0544899		MXAN_5557	0	0	0.00194133		MXAN_5557	0	0	0
MXAN_2967	0.0820352	0.207596	0.137577		MXAN_2967	0.0109272	0.0159542	0.167635		MXAN_2967	0.120644	0.708661	0.211327		MXAN_2967	0	0	0
MXAN_0075	0.0811806	0	0.00365101		MXAN_0075	0.0050356	0.029072	0.00723343		MXAN_0075	0.0232008	0	0.00942931		MXAN_0075	0	0	0
MXAN_1922	0.076908	0	0.00199146		MXAN_1922	0.00135961	0.00425444	0.00208278		MXAN_1922	0	0	0.000554665		MXAN_1922	0	0	0
MXAN_0962	0.0760534	0.191293	0.0232337		MXAN_0962	0.0492985	0.0124088	0.254746		MXAN_0962	0	0	0.0102613		MXAN_0962	0	0	0.0298018
MXAN_2617	0.0700717	0	0.000829775		MXAN_2617	0.000604272	0.00389991	0.000197019		MXAN_2617	0	0	0		MXAN_2617	0	0	0
MXAN_4053	0.0478538	0	0.000829775		MXAN_4053	0.000201424	0	0.000619204		MXAN_4053	0	0	0.000277333		MXAN_4053	0	0	0
MXAN_4297	0.0461448	0	0.00481269		MXAN_4297	0.00589165	0.00141815	0.0199553		MXAN_4297	0	0	0.014144		MXAN_4297	0	0	0
MXAN_4596	0.0410176	0.0343457	0.0018255		MXAN_4596	0	0	0		MXAN_4596	0	0	0		MXAN_4596	0	0	0
tuf(1)	0.000854533	0.302808	0.0587481		tuf(1)	0.21079	0.107779	0.300877		tuf(1)	0.617141	0.669291	0.558825		tuf(1)	0	0	0
MXAN_2979	0	0	0.0449738		MXAN_2979	0.0665202	0.0847343	0.005798		MXAN_2979	0.654262	0	0.0471465		MXAN_2979	100	100	64.4613
rpmG(2)	0	0	0		rpmG(2)	1.04358	0	0.309095		rpmG(2)	2.37576	0	0.438463		rpmG(2)	0	0	9.04485
infA	0	0	0.0741819		infA	0.113704	0	0.0439916		infA	1.91174	0	0.0865277		infA	0	0	1.654
rplN	0	0	0.00464674		rplN	0.216732	0.0645257	0.128344		rplN	0	0	0.0937384		rplN	0	0	1.41559
rpoZ	0	0	0.0843051		rpoZ	0.172469	0.163442	0.270733		rpoZ	0	0	0.165013		rpoZ	0	0	1.32618
acpP(2)	0	0	0.0791605		acpP(2)	0.299517	0	0.15815		acpP(2)	0	0	0.182762		acpP(2)	0	0	1.23678
MXAN_3350	0	0	0.037008		MXAN_3350	0.072009	0.0627531	0.0676058		MXAN_3350	0	0	0.0238506		MXAN_3350	0	0	0.98346
rpsS	0	0	0.0609055		rpsS	0.229774	0.103879	0.294797		rpsS	0	0	0.8026		rpsS	0	0	0.804649
groS	0	0	0.774512		groS	0.166578	0.0506988	1.16042		groS	3.02538	4.6063	3.96031		groS	0	0	0.774847
MXAN_1532	0	0	0.105215		MXAN_1532	0.564088	0.297102	0.448247		MXAN_1532	0	0	0.130901		MXAN_1532	0	0	0.640739
rpsG	0	0.689741	0.0338548		rpsG	0.230177	0.0652348	0.101578		rpsG	0	0	0.0978984		rpsG	0	0	0.610937
MXAN_4637	0	0	0.0268847		MXAN_4637	0.103079	0.0368718	0.0853094		MXAN_4637	0	0	0.0368852		MXAN_4637	0	0	0.551334
rplV	0	0	0.036842		rplV	0.161089	0.0726801	0.232652		rplV	0	0	0.216874		rplV	0	0	0.536433
rpsL	0	0	0.0871264		rpsL	0.286626	0.0953705	0.133607		rpsL	0.324811	0	0.634537		rpsL	0	0	0.461928
MXAN_1093	0	0	0.19035		MXAN_1093	0.117984	0.196414	0.122405		MXAN_1093	0	0	0.238229		MXAN_1093	0	0	0.417225
MXAN_5877	0	0	0.0434802		MXAN_5877	0.149305	0.207404	0.149369		MXAN_5877	0.157765	0	0.194965		MXAN_5877	0	0	0.402325
tsf	0	0	0.0190848		tsf	0.150715	0.0545987	0.115059		tsf	0	0	0.0388266		tsf	0	0	0.372523
rplC	0	0	0.0584162		rplC	0.163607	0.0655893	0.130399		rplC	0.417614	0	0.0887464		rplC	0	0	0.357622
ndk	0	2.32616	0.0794924		ndk	0.190446	0.0241085	0.808314		ndk	0	0	0.185813		ndk	0	0	0.342721
MXAN_6080	0	0	0.0187529		MXAN_6080	0.0144522	0.00531806	0.181483		MXAN_6080	0	0	0.014144		MXAN_6080	0	0	0.342721
ssb	0	0	0.0423185		ssb	0.0781021	0.0797708	0.0258658		ssb	0	0	0.0354986		ssb	0	0	0.283117
MXAN_3791	0	0.203683	0.051612		MXAN_3791	0.0756347	0.0198541	0.104983		MXAN_3791	0.0696023	0	0.213546		MXAN_3791	0	0	0.268216
rplE	0	0	0.00779988		rplE	0.11743	0.0925342	0.0711522		rplE	0	0	0.0435412		rplE	0	0	0.253315
rpoA	0	0	0.0280464		rpoA	0.0593193	0.0623985	0.143965		rpoA	0.0835228	0	0.0615678		rpoA	0	0	0.208613
rpsD(2)	0	0	0.0726883		rpsD(2)	0.175944	0.115579	0.171773		rpsD(2)	0.153125	0	0.156416		rpsD(2)	0	0	0.193712
rpoE1	0	0.438234	0.0741819		rpoE1	0.068182	0.112034	0.0667614		rpoE1	0.148485	0	0.0954024		rpoE1	0	0	0.193712
sucC	0	0.415844	0.0165955		sucC	0.0902882	0.0538896	0.141882		sucC	0	0	0.0346666		sucC	0	0	0.178811
ccmA	0	0	0.0112849		ccmA	0.00216531	0	0.0016043		ccmA	0	0	0		ccmA	0	0	0.178811
MXAN_5727	0	0	0.0229018		MXAN_5727	0.0401337	0.0471534	0.0853939		MXAN_5727	0.125284	0	0.0429865		MXAN_5727	0	0	0.16391
MXAN_6862	0	0	0.0307017		MXAN_6862	0.175893	0.26803	0.126289		MXAN_6862	0	0	0.00665598		MXAN_6862	0	0	0.16391
MXAN_7145	0	0	0.0033191		MXAN_7145	0.0117833	0.0120543	0.00213907		MXAN_7145	0	0	0.00332799		MXAN_7145	0	0	0.16391
gltA	0	0.181945	0.033191		gltA	0.121962	0.112034	0.215877		gltA	0.0649622	0	0.0396585		gltA	0	0	0.149009
rpoN	0	0	0.0360122		rpoN	0.0456225	0.0496352	0.0121871		rpoN	0	0	0.0199679		rpoN	0	0	0.134108
MXAN_7091	0	0	0.010953		MXAN_7091	0.0257823	0.0499897	0.0145231		MXAN_7091	0	0	0.0160853		MXAN_7091	0	0	0.134108
sucD	0	0.847992	0.0277145		sucD	0.0412919	0.0180814	0.22843		sucD	0	0	0.0524158		sucD	0	0	0.119207
ilvE	0	0	0.0307017		ilvE	0.0345945	0.0340356	0.0882647		ilvE	0	0.866142	0.0443732		ilvE	0	0	0.119207
MXAN_5348	0	0	0.036842		MXAN_5348	0.0446154	0.0265903	0.021644		MXAN_5348	0	0	0.0122026		MXAN_5348	0	0	0.119207
prs	0	0	0.00945943		prs	0.0179267	0.00850889	0.0216721		prs	0	0	0.00942931		prs	0	0	0.119207
MXAN_5765	0	0	0.00232337		MXAN_5765	0	0.00850889	0.00737416		MXAN_5765	0	0	0.00221866		MXAN_5765	0	0	0.119207
MXAN_0376	0	0	0.00132764		MXAN_0376	0.00292065	0	0.00309602		MXAN_0376	0	0	0		MXAN_0376	0	0	0.119207
etfA	0	0.259115	0.10953		etfA	0.335421	0.334328	0.133467		etfA	0.180966	0.866142	0.132565		etfA	0	0	0.104306
gapA	0	0	0.0491227		gapA	0.0576072	0.047508	0.0831985		gapA	0	0.826772	0.0604585		gapA	0	0	0.104306
coxB(2)	0	0	0.0262209		coxB(2)	0.0331846	0.0226904	0.175938		coxB(2)	0	0	0.0227413		coxB(2)	0	0	0.104306
add	0	0	0.0307017		add	0.0191856	0.0223358	0.0242334		add	0	0	0.014144		add	0	0	0.104306
purM	0	0.237594	0.00945943		purM	0.0173728	0.03829	0.00394039		purM	0	0	0.00637865		purM	0	0	0.104306
MXAN_5058	0	0	0.0136083		MXAN_5058	0.0306164	0.0379355	0.0215033		MXAN_5058	0	0	0.00610132		MXAN_5058	0	0	0.104306
rpoB	0	0.0506491	0.0818158		rpoB	0.0597222	0.0712619	0.0914733		rpoB	0.199527	0	0.166677		rpoB	0	0	0.0894055
MXAN_3774	0	0.208248	0.0949263		MXAN_3774	0.0399323	0.023754	0.111963		MXAN_3774	0.111364	0	0.11648		MXAN_3774	0	0	0.0894055
MXAN_3984	0	0	0.126292		MXAN_3984	0.0114812	0.028363	0.0119056		MXAN_3984	0.30625	0	0.0923517		MXAN_3984	0	0	0.0894055
pnpA	0	0	0.0255571		pnpA	0.100511	0.140751	0.0583178		pnpA	0.143845	0	0.0920744		pnpA	0	0	0.0894055
glgC	0	0	0.00779988		glgC	0.0264369	0.0375809	0.0126092		glgC	0	0	0		glgC	0	0	0.0894055
MXAN_4982	0	0	0.00431483		MXAN_4982	0.00302136	0	0.00106953		MXAN_4982	0	0	0		MXAN_4982	0	0	0.0894055
atpD	0	0	0.0876242		atpD	0.036357	0.0262357	0.164342		atpD	0.28305	0	0.0854184		atpD	0	0	0.0745045
MXAN_0506	0	0	0.295898		MXAN_0506	0.020797	0.0393536	0.0179288		MXAN_0506	0.060322	0	0.0707198		MXAN_0506	0	0	0.0745045
MXAN_5372	0	0	0.0177572		MXAN_5372	0.114308	0.165214	0.00247682		MXAN_5372	0	0.629921	0.0413225		MXAN_5372	0	0	0.0745045
lon(1)	0	0.0899945	0.0411568		lon(1)	0.054888	0.0705529	0.0520694		lon(1)	0	0	0.0354986		lon(1)	0	0	0.0745045
clpX(1)	0	0	0.0600757		clpX(1)	0.12876	0.209531	0.0328741		clpX(1)	0.0649622	0.629921	0.0321706		clpX(1)	0	0	0.0745045
MXAN_3106	0	0	0.0336889		MXAN_3106	0.0134954	0	0.0661141		MXAN_3106	0	0	0.0180266		MXAN_3106	0	0	0.0745045
clpX(2)	0	0	0.0240635		clpX(2)	0.135256	0.234704	0.0391506		clpX(2)	0	0	0.0146986		clpX(2)	0	0	0.0745045
accC(3)	0	0	0.00597438		accC(3)	0.0106251	0	0.0305099		accC(3)	0	0	0.00887464		accC(3)	0	0	0.0745045
asnS	0	0	0.00448078		asnS	0.00790589	0.00531806	0.035745		asnS	0	0	0.00443732		asnS	0	0	0.0745045
tyrS	0	0	0.00580842		tyrS	0.00790589	0	0.00447516		tyrS	0	0	0.001664		tyrS	0	0	0.0745045
MXAN_4586	0	0	0.00829775		MXAN_4586	0.00755339	0.0187905	0.0124122		MXAN_4586	0.0510417	0	0.0324479		MXAN_4586	0	0	0.0596036
MXAN_3559	0	0	0.0253911		MXAN_3559	0.0219048	0.0272993	0.0194486		MXAN_3559	0.0974433	0	0.0313386		MXAN_3559	0	0	0.0596036
MXAN_3748	0	0	0.00929348		MXAN_3748	0.0267894	0.0294266	0.030144		MXAN_3748	0	0	0.0221866		MXAN_3748	0	0	0.0596036
gspE	0	0	0		gspE	0.00261851	0.00389991	0.0102732		gspE	0	0	0.0205226		gspE	0	0	0.0596036
glmS(2)	0	0	0.00547651		glmS(2)	0.0777496	0.140397	0.0152831		glmS(2)	0.0417614	0	0.014976		glmS(2)	0	0	0.0596036
pccB	0	0	0.00796584		pccB	0.0278972	0.014536	0.0473128		pccB	0.0510417	0	0.0102613		pccB	0	0	0.0596036
MXAN_5879	0	0	0.00813179		MXAN_5879	0.00810731	0.0138269	0.00202649		MXAN_5879	0	0	0.00970664		MXAN_5879	0	0	0.0596036
lon(2)	0	0	0.0703649		lon(2)	0.133091	0.176559	0.0723906		lon(2)	0.190246	0.314961	0.0593492		lon(2)	0	0	0.0447027
thiC	0	0.120645	0.0311995		thiC	0.0291561	0.0510533	0.0546025		thiC	0.125284	0.393701	0.0302292		thiC	0	0	0.0447027
thrS(1)	0	0	0.00630629		thrS(1)	0.0122869	0.00744528	0.00875329		thrS(1)	0	0	0.0110933		thrS(1)	0	0	0.0447027
MXAN_5322	0	0	0.00431483		MXAN_5322	0.00639521	0.0116997	0.0136225		MXAN_5322	0.0417614	0	0.00831998		MXAN_5322	0	0	0.0447027
MXAN_5510	0	0	0.00547651		MXAN_5510	0.00176246	0	0.0035182		MXAN_5510	0.0371212	0	0.00388266		MXAN_5510	0	0	0.0447027
infB	0	0	0.0788286		infB	0.0500035	0.0659439	0.062624		infB	0.0696023	0.23622	0.142272		infB	0	0	0.0298018
MXAN_5808	0	0.0673872	0.0159317		MXAN_5808	0.0858066	0.138624	0.0255562		MXAN_5808	0.0232008	0	0.0202453		MXAN_5808	0	0	0.0298018
MXAN_3002	0	0.0578226	0.00697011		MXAN_3002	0.013999	0.0113452	0.0121026		MXAN_3002	0	0	0.00776531		MXAN_3002	0	0	0.0298018
MXAN_4870	0	0	0.0204125		MXAN_4870	0.020797	0.0287175	0.0544618		MXAN_4870	0	0	0.00610132		MXAN_4870	0	0	0.0298018
dnaE(2)	0	0	0.00730202		dnaE(2)	0.0143515	0.00779981	0.00976653		dnaE(2)	0	0	0.00582398		dnaE(2)	0	0	0.0298018
MXAN_2261	0	0.0623875	0.00497865		MXAN_2261	0.0108265	0.0141815	0.0231076		MXAN_2261	0	0	0.00471465		MXAN_2261	0	0	0.0298018
MXAN_1123	0	0	0.00348505		MXAN_1123	0.00186317	0	0.00402483		MXAN_1123	0	0	0.00305066		MXAN_1123	0	0	0.0298018
MXAN_5766	0	0	0.00730202		MXAN_5766	0.00538809	0.00460898	0.00506621		MXAN_5766	0	0	0.000554665		MXAN_5766	0	0	0.0298018
MXAN_0142	0	0	0.0129445		MXAN_0142	0.00609307	0.00212722	0.00754303		MXAN_0142	0.00928031	0	0.00471465		MXAN_0142	0	0	0.0149009
MXAN_6735	0	0	0.0131104		MXAN_6735	0.0105748	0.00354537	0.0148046		MXAN_6735	0	0	0.00221866		MXAN_6735	0	0	0.0149009
rpsO	0	2.00075	0.50135		rpsO	0.420573	0.417999	0.171435		rpsO	2.34792	0	2.47076		rpsO	0	0	0
MXAN_2990	0	0	0.114509		MXAN_2990	1.09706	2.3364	0.0728409		MXAN_2990	0.923391	0	1.89585		MXAN_2990	0	0	0
MXAN_2836	0	0	0.0210763		MXAN_2836	0.0173728	0	0.0112583		MXAN_2836	1.55445	0	1.63959		MXAN_2836	0	0	0
MXAN_2720	0	0	1.38191		MXAN_2720	1.24359	0.95335	0.694409		MXAN_2720	0.951232	0	1.59577		MXAN_2720	0	0	0
atpE	0	0	0.20595		atpE	0.38195	0.0875706	1.18518		atpE	1.67046	0	1.40164		atpE	0	0	0
MXAN_3345	0	0	0.127122		MXAN_3345	1.18397	0.622567	0.186409		MXAN_3345	1.16468	0	1.24217		MXAN_3345	0	0	0
MXAN_6720	0	2.33029	0.0726883		MXAN_6720	0.135055	0.0716165	0.454355		MXAN_6720	0.728504	0	1.06357		MXAN_6720	0	0	0
rplU	0	0	0.0693692		rplU	0.517911	0.432181	0.171773		rplU	1.73542	0	0.84836		rplU	0	0	0
MXAN_3340	0	0	0		MXAN_3340	0.123926	0	0		MXAN_3340	0	0	0.822846		MXAN_3340	0	0	0
rpmA	0	1.9001	0.125462		rpmA	0.354154	0.284339	0.255422		rpmA	0	0	0.816467		rpmA	0	0	0
MXAN_0809	0	0	0.684564		MXAN_0809	0.0909932	0.342483	0.581376		MXAN_0809	0	0	0.707198		MXAN_0809	0	0	0
MXAN_2966	0	0	0.208108		MXAN_2966	0.0299114	0.0304902	0.131131		MXAN_2966	0	0	0.62899		MXAN_2966	0	0	0
MXAN_5485	0	0.361065	0.152513		MXAN_5485	0.0453707	0.0350992	0.366428		MXAN_5485	0.691383	1.81102	0.564094		MXAN_5485	0	0	0
cspE	0	0	0.173921		cspE	0.170455	0	0.10079		cspE	0	0	0.533588		cspE	0	0	0
MXAN_4809	0	0.644526	0.747129		MXAN_4809	0.178965	0.0407718	0.379065		MXAN_4809	0.213447	0	0.490047		MXAN_4809	0	0	0
rplQ	0	0	0.0705309		rplQ	0.20374	0.0779981	0.321761		rplQ	0.269129	0	0.458153		rplQ	0	0	0
MXAN_2627	0	0	0.688879		MXAN_2627	0.200366	0.221586	0.121336		MXAN_2627	0.839868	1.9685	0.455103		MXAN_2627	0	0	0
rpmH	0	0	0		rpmH	0.409998	0	0.243122		rpmH	0	0	0.439572		rpmH	0	0	0
MXAN_4816	0	0.534098	0.680747		MXAN_4816	0.0468814	0	0.0753459		MXAN_4816	0.176326	0	0.433193		MXAN_4816	0	0	0
MXAN_4896	0	2.23443	0.303034		MXAN_4896	0.0758361	0.132597	0.044639		MXAN_4896	0	0	0.431529		MXAN_4896	0	0	0
MXAN_6573	0	0	0.12513		MXAN_6573	0.0939139	0.0109906	0.403468		MXAN_6573	0.120644	0	0.400191		MXAN_6573	0	0	0
MXAN_4985	0	0	0.0229018		MXAN_4985	0	0	0		MXAN_4985	0.515057	0	0.392148		MXAN_4985	0	0	0
MXAN_2968	0	0	0.322782		MXAN_2968	0.0203942	0.0489261	0.139771		MXAN_2968	0.227368	0	0.38466		MXAN_2968	0	0	0
rpmE	0	0	0.114509		rpmE	0.266433	0.292138	0.23769		rpmE	0	0	0.371071		rpmE	0	0	0
MXAN_2140	0	0	0.146704		MXAN_2140	0.00130926	0	0.00275827		MXAN_2140	0.171686	0	0.362474		MXAN_2140	0	0	0
MXAN_0785	0	0	0.480772		MXAN_0785	0.00986977	0	0.0105828		MXAN_0785	0.218087	0	0.360532		MXAN_0785	0	0	0
rpsJ	0	0	0.0393313		rpsJ	0.206359	0	0.140222		rpsJ	0	0	0.358868		rpsJ	0	0	0
sodB	0	0	0.150023		sodB	0.153334	0.159896	0.12294		sodB	0.338731	1.61417	0.350271		sodB	0	0	0
MXAN_5725	0	0	0.0190848		MXAN_5725	0	0.129051	0		MXAN_5725	0.631061	0	0.343338		MXAN_5725	0	0	0
rplT	0	0	0.108866		rplT	0.246644	0.0358082	0.204225		rplT	0.361932	0	0.283711		rplT	0	0	0
MXAN_1448	0	0	0.166619		MXAN_1448	0.156607	0.0514079	0.492155		MXAN_1448	0.134565	0	0.282879		MXAN_1448	0	0	0
cspD	0	0	0.272332		cspD	0.572245	0.124442	0.18137		cspD	1.16468	0	0.282324		cspD	0	0	0
MXAN_5121	0	0	0.189355		MXAN_5121	0.211948	0.148906	0.721964		MXAN_5121	0.491857	0	0.247658		MXAN_5121	0	0	0
rpsF	0	0	0.00298719		rpsF	0.194525	0.0638167	0.227248		rpsF	0.445455	0	0.23601		rpsF	0	0	0
MXAN_5135	0	0.199988	0.10505		MXAN_5135	0.146536	0.129406	0.0489734		MXAN_5135	0.208807	0	0.234069		MXAN_5135	0	0	0
MXAN_0451	0	0	0.0497865		MXAN_0451	0.00997048	0	0.0410082		MXAN_0451	0.28305	0	0.233514		MXAN_0451	0	0	0
MXAN_0864	0	0	0.0282123		MXAN_0864	0.150161	0.130115	0.0373493		MXAN_0864	0	0	0.226581		MXAN_0864	0	0	0
MXAN_3849	0	0	0.239971		MXAN_3849	0.0370116	0.150324	0.0179006		MXAN_3849	0	0	0.225471		MXAN_3849	0	0	0
MXAN_6922	0	0	0.103888		MXAN_6922	0.0749297	0.0163087	0.0708989		MXAN_6922	0.171686	0	0.223807		MXAN_6922	0	0	0
MXAN_3122	0	0	0.0897817		MXAN_3122	0.00372634	0.0116997	0.0110612		MXAN_3122	0.185606	0	0.217706		MXAN_3122	0	0	0
MXAN_4897	0	0	0.0851349		MXAN_4897	0.0376159	0.0230449	0.00942879		MXAN_4897	0	0	0.216597		MXAN_4897	0	0	0
MXAN_2835	0	0	0.00464674		MXAN_2835	0.00518666	0	0.00104139		MXAN_2835	0.324811	0	0.214933		MXAN_2835	0	0	0
MXAN_4294	0	0	0.13459		MXAN_4294	0.121459	0.0067362	0.149791		MXAN_4294	0.0742425	0	0.213823		MXAN_4294	0	0	0
rpmC	0	0	0		rpmC	0.284108	0	0.153591		rpmC	0	0	0.213546		rpmC	0	0	0
rpmI	0	0	0.0695351		rpmI	0.170455	0	0.182384		rpmI	0	0	0.213546		rpmI	0	0	0
rpsA	0	0.266723	0.0776669		rpsA	0.186116	0.108488	0.177289		rpsA	0.232008	0.433071	0.209663		rpsA	0	0	0
rplO	0	0	0.0413228		rplO	0.271721	0.146778	0.256857		rplO	0.190246	0	0.209663		rplO	0	0	0
rplD	0	0	0.0243954		rplD	0.188885	0.159896	0.159135		rplD	0.459375	0	0.207445		rplD	0	0	0
rplB	0	0	0.0340208		rplB	0.146385	0.0982068	0.187816		rplB	0.315531	0	0.203285		rplB	0	0	0
MXAN_5617	0	0	0.0302038		MXAN_5617	0	0	0.00115397		MXAN_5617	0	0	0.193578		MXAN_5617	0	0	0
MXAN_5024	0	0	0.117994		MXAN_5024	0.00246744	0	0.0340562		MXAN_5024	0.167046	0	0.190527		MXAN_5024	0	0	0
MXAN_7095	0	0	0.0250592		MXAN_7095	0.00931585	0	0.00416555		MXAN_7095	0	0	0.188309		MXAN_7095	0	0	0
MXAN_6756	0	0	0.0253911		MXAN_6756	0.044565	0.0826071	0.0780478		MXAN_6756	0.29233	0	0.186645		MXAN_6756	0	0	0
MXAN_5169	0	0	0.735181		MXAN_5169	0.474202	0	0.620611		MXAN_5169	0	6.61417	0.182762		MXAN_5169	0	0	0
MXAN_1451	0	0	0.733355		MXAN_1451	0.164714	0.0124088	0.627366		MXAN_1451	0.129924	0	0.18193		MXAN_1451	0	0	0
rpsH	0	0	0.0300379		rpsH	0.0987984	0.0262357	0.264569		rpsH	0	0	0.179157		rpsH	0	0	0
MXAN_1121	0	0	0		MXAN_1121	0	0	0.000703641		MXAN_1121	0	0	0.178602		MXAN_1121	0	0	0
rpmD	0	2.00075	0.0175912		rpmD	0.22494	0.0595622	0.252748		rpmD	0.58466	0	0.178047		rpmD	0	0	0
MXAN_6967	0	0	0.0761733		MXAN_6967	0.0037767	0.0698438	0.0146639		MXAN_6967	0.241288	0	0.176938		MXAN_6967	0	0	0
rplA	0	0	0.0660501		rplA	0.114459	0.0485716	0.152887		rplA	0.389773	0	0.174165		rplA	0	0	0
MXAN_6754	0	1.47969	0.0066382		MXAN_6754	0.692747	1.43694	0.0126092		MXAN_6754	0.90019	0	0.171669		MXAN_6754	0	0	0
rpsP	0	0	0.0380037		rpsP	0.179418	0.0645257	0.108164		rpsP	0	0	0.171669		rpsP	0	0	0
MXAN_1447	0	0	0.123802		MXAN_1447	0.158923	0.0262357	0.168508		MXAN_1447	0	0	0.171114		MXAN_1447	0	0	0
MXAN_3665	0	0	0.0728542		MXAN_3665	0.0341917	0	0.0130033		MXAN_3665	0.417614	0	0.170837		MXAN_3665	0	0	0
MXAN_7040	0	0	0.153011		MXAN_7040	0.0610314	0.0131179	0.395137		MXAN_7040	0	0	0.166954		MXAN_7040	0	0	0
MXAN_4293	0	0	0.213252		MXAN_4293	0.164815	0.0645257	0.253817		MXAN_4293	0	0	0.16113		MXAN_4293	0	0	0
MXAN_6646	0	0	0.0735181		MXAN_6646	0.0628442	0.0772891	0.0213062		MXAN_6646	0	0	0.159466		MXAN_6646	0	0	0
MXAN_6757	0	0	0.0453057		MXAN_6757	0.0558448	0.0684256	0.029384		MXAN_6757	0	0	0.158912		MXAN_6757	0	0	0
rplX	0	0	0.066548		rplX	0.394891	0.0762255	0.108192		rplX	0.385133	0	0.153365		rplX	0	0	0
pdhA	0	0.206074	0.0761733		pdhA	0.0969856	0.0467989	0.236114		pdhA	0.213447	0	0.153088		pdhA	0	0	0
MXAN_1449	0	0	0.130938		MXAN_1449	0.145579	0.147842	0.0980312		MXAN_1449	0.482576	1.14173	0.152256		MXAN_1449	0	0	0
MXAN_4655	0	0	0.0399952		MXAN_4655	0.0146032	0.181168	0.0529701		MXAN_4655	0	0	0.150314		MXAN_4655	0	0	0
MXAN_4956	0	0	0.0819818		MXAN_4956	0.32958	0.0932432	0.298653		MXAN_4956	0.464016	0	0.147541		MXAN_4956	0	0	0
MXAN_4362	0	0	0		MXAN_4362	0.126645	0.135788	0.106109		MXAN_4362	0	0	0.147264		MXAN_4362	0	0	0
rplM	0	0	0.0388335		rplM	0.1415	0.136851	0.0229387		rplM	0.236648	0	0.145045		rplM	0	0	0
MXAN_7094	0	0	0.0439781		MXAN_7094	0.00689877	0	0.0220943		MXAN_7094	0.0742425	0	0.143936		MXAN_7094	0	0	0
MXAN_0425	0	0	0.00464674		MXAN_0425	0.152528	0.592077	0.0540396		MXAN_0425	0	0	0.142826		MXAN_0425	0	0	0
rbfA	0	0	0.014604		rbfA	0.0221063	0	0.0146357		rbfA	0	0	0.142549		rbfA	0	0	0
MXAN_4946	0	0	0.106543		MXAN_4946	0.0706494	0.144297	0.117564		MXAN_4946	0	0	0.141162		MXAN_4946	0	0	0
MXAN_4470	0	0	0.018255		MXAN_4470	0.00931585	0.0163087	0.00163245		MXAN_4470	0.264489	0	0.139498		MXAN_4470	0	0	0
rplP	0	0	0.018587		rplP	0.309891	0.129761	0.202029		rplP	0.269129	0	0.136725		rplP	0	0	0
MXAN_6487	0	0	0.162636		MXAN_6487	0.013999	0.0216268	0.138082		MXAN_6487	0.176326	0	0.134784		MXAN_6487	0	0	0
MXAN_3546	0	0	0.0233997		MXAN_3546	0.0695919	0.0531806	0.00382781		MXAN_3546	0.524338	0	0.134229		MXAN_3546	0	0	0
rnk	0	0	0.112517		rnk	0.12025	0.262712	0.145766		rnk	0	0	0.130346		rnk	0	0	0
MXAN_0945	0	0	0.0149359		MXAN_0945	0.0012589	0.00248176	0.00101324		MXAN_0945	0.0278409	0	0.130069		MXAN_0945	0	0	0
MXAN_3738	0	0	0.0529396		MXAN_3738	0.0042299	0.0131179	0.00616389		MXAN_3738	0.139205	0	0.129514		MXAN_3738	0	0	0
MXAN_1122	0	0	0.022072		MXAN_1122	0	0.0131179	0		MXAN_1122	0.278409	0	0.128405		MXAN_1122	0	0	0
MXAN_0883	0	0	0.123636		MXAN_0883	0.0811738	0.0875706	0.0161556		MXAN_0883	0	0	0.126741		MXAN_0883	0	0	0
MXAN_2837	0	0	0.0129445		MXAN_2837	0.00634485	0	0.0188013		MXAN_2837	0.255209	0	0.126186		MXAN_2837	0	0	0
MXAN_4234	0	0	0.0982454		MXAN_4234	0.0554923	0.0375809	0.0588244		MXAN_4234	0	0	0.125354		MXAN_4234	0	0	0
MXAN_1092	0	0	0.669628		MXAN_1092	0.186367	0.11877	0.241124		MXAN_1092	0	0	0.123136		MXAN_1092	0	0	0
MXAN_4331	0	0	0.140232		MXAN_4331	0.0722608	0.11487	0.105321		MXAN_4331	0	0	0.122581		MXAN_4331	0	0	0
rplR	0	0	0.0233997		rplR	0.153636	0.0705529	0.251594		rplR	0.245928	0	0.121749		rplR	0	0	0
cspB	0	0	0.113845		cspB	0.144068	0.13047	0.0635528		cspB	0	0	0.119808		cspB	0	0	0
MXAN_5618	0	0	0.0545992		MXAN_5618	0.00438097	0.0269448	0.00596687		MXAN_5618	0	0	0.118421		MXAN_5618	0	0	0
MXAN_2644	0	0	0.136249		MXAN_2644	0.0184303	0.023754	0.0389254		MXAN_2644	0.153125	0	0.116757		MXAN_2644	0	0	0
MXAN_2851	0	0.168033	0.0104552		MXAN_2851	0.0149557	0	0.0510562		MXAN_2851	0.116004	0	0.116757		MXAN_2851	0	0	0
infC	0	0	0.084969		infC	0.140342	0.126924	0.0589088		infC	0.120644	0	0.116202		infC	0	0	0
MXAN_6831	0	0	0.0202465		MXAN_6831	0.00387741	0.023754	0.0180414		MXAN_6831	0	0	0.115925		MXAN_6831	0	0	0
MXAN_3071	0	0	0.040659		MXAN_3071	0.0310696	0	0.0503244		MXAN_3071	0	0	0.115925		MXAN_3071	0	0	0
rplS	0	0	0.0562587		rplS	0.17262	0.0602713	0.269523		rplS	0.617141	2.87402	0.115093		rplS	0	0	0
MXAN_6486	0	0	0.172427		MXAN_6486	0.0132436	0.0407718	0.0553062		MXAN_6486	0	0	0.114816		MXAN_6486	0	0	0
MXAN_5390	0	0	0.0360122		MXAN_5390	0.0300625	0	0.133523		MXAN_5390	0	0	0.114816		MXAN_5390	0	0	0
MXAN_5703	0	0	0.108535		MXAN_5703	0.0737715	0.0815435	0.0823823		MXAN_5703	0.371212	0	0.110933		MXAN_5703	0	0	0
MXAN_1152	0	0	0.0106211		MXAN_1152	0.00614343	0	0.00230794		MXAN_1152	0.194887	0	0.110656		MXAN_1152	0	0	0
MXAN_0991	0	0	0.101233		MXAN_0991	0.017826	0.0272993	0.0500429		MXAN_0991	0	0	0.110378		MXAN_0991	0	0	0
rplF	0	0	0.0162636		rplF	0.137522	0.0166632	0.177993		rplF	0	0	0.110378		rplF	0	0	0
rpsR	0	0	0.0122807		rpsR	0.163808	0.0287175	0.137576		rpsR	0	0	0.10816		rpsR	0	0	0
MXAN_3205	0	0	0.0245613		MXAN_3205	0.0467807	0.0287175	0.0938938		MXAN_3205	0	0	0.10816		MXAN_3205	0	0	0
MXAN_1623	0	0.32498	0.0693692		MXAN_1623	0.0885761	0.0843798	0.216187		MXAN_1623	0.116004	0.551181	0.105664		MXAN_1623	0	0	0
MXAN_6440	0	0	0.095922		MXAN_6440	0.0456225	0.167341	0.00723343		MXAN_6440	0.575379	0	0.105109		MXAN_6440	0	0	0
MXAN_1402	0	0	0.018587		MXAN_1402	0.0291057	0.00886343	0.0165215		MXAN_1402	0.190246	0	0.103722		MXAN_1402	0	0	0
MXAN_0608	0	0	0.164295		MXAN_0608	0	0	0.0105265		MXAN_0608	0	0	0.102336		MXAN_0608	0	0	0
MXAN_0808	0	0	0.153342		MXAN_0808	0.0175742	0.0464443	0.0411208		MXAN_0808	0.162405	0	0.102058		MXAN_0808	0	0	0
MXAN_4361	0	1.10993	0.0791605		MXAN_4361	0.106553	0.0684256	0.0629899		MXAN_4361	0.348012	0	0.100672		MXAN_4361	0	0	0
MXAN_0946	0	0	0.0142721		MXAN_0946	0.00513631	0.0159542	0.00813409		MXAN_0946	0.0835228	0	0.0995624		MXAN_0946	0	0	0
MXAN_0948	0	0	0.0243954		MXAN_0948	0.00347456	0	0.00106953		MXAN_0948	0	0	0.096789		MXAN_0948	0	0	0
MXAN_3985	0	0	0.0816499		MXAN_3985	0.0211999	0.0779981	0.00582615		MXAN_3985	0.269129	0	0.0965117		MXAN_3985	0	0	0
MXAN_4987	0	0	0.00215741		MXAN_4987	0	0	0.00137914		MXAN_4987	0.320171	0	0.095957		MXAN_4987	0	0	0
MXAN_0694	0	0	0.411236		MXAN_0694	0.0267894	0	0.0184917		MXAN_0694	0.334091	0	0.0954024		MXAN_0694	0	0	0
MXAN_5865	0	0	0		MXAN_5865	0	0.0627531	0.0186606		MXAN_5865	0	0	0.0948477		MXAN_5865	0	0	0
MXAN_4413	0	0.167381	0.00597438		MXAN_4413	0.0306668	0.0109906	0.0622018		MXAN_4413	0.176326	0	0.0945704		MXAN_4413	0	0	0
MXAN_2081	0	0	0.092105		MXAN_2081	0.017826	0.0155996	0.0295529		MXAN_2081	0.167046	0	0.0901331		MXAN_2081	0	0	0
sucB	0	0	0.0839732		sucB	0.0314725	0.0131179	0.0949634		sucB	0.139205	0.669291	0.0893011		sucB	0	0	0
MXAN_1618	0	0	0.126956		MXAN_1618	0.218343	0.534287	0.125501		MXAN_1618	0	0	0.0890237		MXAN_1618	0	0	0
atpF	0	0	0.0318634		atpF	0.0581611	0.0187905	0.148468		atpF	0.194887	0	0.0884691		atpF	0	0	0
MXAN_6976	0	0	0.305855		MXAN_6976	0.00332349	0.0205631	0.0261473		MXAN_6976	0	0	0.0881917		MXAN_6976	0	0	0
MXAN_5566	0	0	0.0136083		MXAN_5566	0.00523702	0	0.0096821		MXAN_5566	0	0	0.0881917		MXAN_5566	0	0	0
MXAN_6228	0	0	0.0219061		MXAN_6228	0.0242212	0	0.06223		MXAN_6228	0	0	0.0879144		MXAN_6228	0	0	0
rpsB	0	0	0.0202465		rpsB	0.0895833	0.0517624	0.088124		rpsB	0	0	0.0876371		rpsB	0	0	0
MXAN_3169	0	0	0.0818158		MXAN_3169	0.0111287	0.0170178	0.0105546		MXAN_3169	0	0	0.0868051		MXAN_3169	0	0	0
rplK	0	0.749954	0.0467993		rplK	0.153636	0.0705529	0.14177		rplK	0.245928	0	0.0859731		rplK	0	0	0
etfB	0	0	0.203461		etfB	0.335522	0.285048	0.0820445		etfB	0.227368	0	0.0848637		etfB	0	0	0
sucA	0	0	0.0633948		sucA	0.0198403	0.0198541	0.112329		sucA	0.162405	0	0.0845864		sucA	0	0	0
sodC	0	0	0.0202465		sodC	0.128307	0.193223	0.120041		sodC	0	0	0.0837544		sodC	0	0	0
lpdA	0	0.167598	0.0492886		lpdA	0.0834398	0.0542442	0.205857		lpdA	0.116004	1.14173	0.0829224		lpdA	0	0	0
MXAN_2454	0	0	0.158985		MXAN_2454	0.0883747	0.0478625	0.127275		MXAN_2454	0.338731	0	0.0829224		MXAN_2454	0	0	0
MXAN_5880	0	0	0.0609055		MXAN_5880	0.0864612	0.118415	0.0263162		MXAN_5880	0	0	0.0829224		MXAN_5880	0	0	0
rpsN(2)	0	0	0		rpsN(2)	0.2334	0.168051	0.173884		rpsN(2)	0	0	0.0826451		rpsN(2)	0	0	0
ihfB(1)	0	0	0.055263		ihfB(1)	0.0227609	0.0347446	0.0221506		ihfB(1)	0	0	0.0795944		ihfB(1)	0	0	0
MXAN_3411	0	0	0.150687		MXAN_3411	0	0	0.0396291		MXAN_3411	0	0	0.0795944		MXAN_3411	0	0	0
trx(1)	0	0	0.111356		trx(1)	0.314221	0.340356	0.156884		trx(1)	0	0	0.0793171		trx(1)	0	0	0
MXAN_2838	0	0	0.00547651		MXAN_2838	0.00211495	0	0.00765561		MXAN_2838	0.139205	0	0.0770984		MXAN_2838	0	0	0
nusG	0	0	0.0718585		nusG	0.043004	0.052826	0.0540396		nusG	0	0	0.0770984		nusG	0	0	0
rpmF	0	0	0.114343		rpmF	0.27157	0	0.190377		rpmF	0	0	0.0770984		rpmF	0	0	0
MXAN_3255	0	0	0.0229018		MXAN_3255	0	0	0.0131159		MXAN_3255	0	0	0.0770984		MXAN_3255	0	0	0
MXAN_2650	0	2.49485	0.166453		MXAN_2650	0.633025	0.381836	0.890359		MXAN_2650	0	0	0.0768211		MXAN_2650	0	0	0
MXAN_0703	0	0	0.0252252		MXAN_0703	0.0161139	0.0790618	0.0262317		MXAN_0703	0	0	0.0762664		MXAN_0703	0	0	0
atpC	0	0	0.0307017		atpC	0.0307675	0	0.0961173		atpC	0	0	0.0754344		atpC	0	0	0
fghA	0	0.30259	0.0282123		fghA	0.00317243	0	0.0132003		fghA	0.102083	0	0.0751571		fghA	0	0	0
glnA	0	0	0.100901		glnA	0.119797	0.0315538	0.0194486		glnA	0	0	0.0732158		glnA	0	0	0
MXAN_0257	0	0	0.155168		MXAN_0257	0.0130422	0.0400627	0.0166341		MXAN_0257	0	0	0.0721065		MXAN_0257	0	0	0
MXAN_2436	0	0	0.0942624		MXAN_2436	0.0280986	0	0.0446108		MXAN_2436	0	0	0.0721065		MXAN_2436	0	0	0
MXAN_3207	0	0	0.051446		MXAN_3207	0	0	0		MXAN_3207	0	0	0.0718291		MXAN_3207	0	0	0
MXAN_5922	0	0	0.029374		MXAN_5922	0.038472	0.0393536	0.0819319		MXAN_5922	0	0	0.0707198		MXAN_5922	0	0	0
efp	0	0	0.0202465		efp	0.0523702	0.0322629	0.0779353		efp	0	0	0.0696105		efp	0	0	0
MXAN_4410	0	0	0.00697011		MXAN_4410	0.0189842	0.0251721	0.0244586		MXAN_4410	0	0	0.0687785		MXAN_4410	0	0	0
MXAN_0942	0	0	0.0124466		MXAN_0942	0.0136968	0	0.00326489		MXAN_0942	0	0	0.0687785		MXAN_0942	0	0	0
recA(2)	0	0	0.0348505		recA(2)	0.0432558	0.0577895	0.0215314		recA(2)	0.0788827	0	0.0685011		recA(2)	0	0	0
MXAN_2589	0	0	0.181389		MXAN_2589	0.0858066	0	0.0775131		MXAN_2589	0.403694	0	0.0682238		MXAN_2589	0	0	0
MXAN_5638	0	0	0.0209103		MXAN_5638	0.0391266	0	0.0101324		MXAN_5638	0	0	0.0671145		MXAN_5638	0	0	0
clpP(2)	0	0	0.0408249		clpP(2)	0.159226	0.16096	0.082326		clpP(2)	0	1.45669	0.0668371		clpP(2)	0	0	0
MXAN_4671	0	0	0.105381		MXAN_4671	0.100561	0.195704	0.011202		MXAN_4671	0	0.433071	0.0668371		MXAN_4671	0	0	0
fabG	0	0	0.0444759		fabG	0.040738	0.0226904	0.0745859		fabG	0	0	0.0668371		fabG	0	0	0
MXAN_2478	0	0	0		MXAN_2478	0.0195381	0	0.00219536		MXAN_2478	0	0	0.0668371		MXAN_2478	0	0	0
MXAN_0976	0	0	0.964862		MXAN_0976	0.0140493	0.0173723	0.0842399		MXAN_0976	0.185606	0	0.0665598		MXAN_0976	0	0	0
MXAN_3347	0	0	0.0474631		MXAN_3347	0.0366591	0.0804799	0.010639		MXAN_3347	0	0	0.0651731		MXAN_3347	0	0	0
MXAN_7039	0	0.0715174	0.0965858		MXAN_7039	0.0337889	0.00460898	0.244557		MXAN_7039	0.125284	0	0.0648958		MXAN_7039	0	0	0
MXAN_4094	0	0	0.0134424		MXAN_4094	0	0	0.00804965		MXAN_4094	0	0	0.0640638		MXAN_4094	0	0	0
MXAN_3206	0	0	0.0240635		MXAN_3206	0.0762893	0.067362	0.176361		MXAN_3206	0.143845	0	0.0635091		MXAN_3206	0	0	0
MXAN_6704	0	0.564966	0.095756		MXAN_6704	0.078656	0.107425	0.131806		MXAN_6704	0	0	0.0626771		MXAN_6704	0	0	0
rpsT	0	0	0.0167615		rpsT	0.139788	0.0567259	0.0934435		rpsT	0	0	0.0626771		rpsT	0	0	0
MXAN_6856	0	0	0.0250592		MXAN_6856	0.0465793	0	0.00622018		MXAN_6856	0	0	0.0626771		MXAN_6856	0	0	0
MXAN_2083	0	0	0.018587		MXAN_2083	0.237882	0.258103	0.126205		MXAN_2083	0	0	0.0623998		MXAN_2083	0	0	0
MXAN_7407	0	0.911684	0.0892838		MXAN_7407	0.224336	0.116288	0.614504		MXAN_7407	0	0	0.0621225		MXAN_7407	0	0	0
MXAN_2734	0	0	0.123802		MXAN_2734	0.0521184	0.0634621	0.0736571		MXAN_2734	0	0	0.0612905		MXAN_2734	0	0	0
iscU	0	0	0.0399952		iscU	0.0228113	0.0556623	0.0180695		iscU	0	0	0.0612905		iscU	0	0	0
MXAN_5003	0	0	0.0321953		MXAN_5003	0.0909429	0	0.00751488		MXAN_5003	0	0	0.0612905		MXAN_5003	0	0	0
MXAN_0572	0	0	0.0416547		MXAN_0572	0.042299	0.0301356	0.0902068		MXAN_0572	0.106724	0	0.0610132		MXAN_0572	0	0	0
tatA	0	0	0.1633		tatA	0.218495	0.222295	0.200003		tatA	0	0	0.0610132		tatA	0	0	0
atpH	0	0	0.00979134		atpH	0.0112797	0	0.0199834		atpH	0.180966	0	0.0607358		atpH	0	0	0
MXAN_1455	0	0	0.0131104		MXAN_1455	0.0130422	0.0134724	0.0593873		MXAN_1455	0	0	0.0607358		MXAN_1455	0	0	0
MXAN_7110	0	0	0.0376718		MXAN_7110	0.0880726	0.0436081	0.149622		MXAN_7110	0.116004	0	0.0604585		MXAN_7110	0	0	0
pgk	0	0.202379	0.0431483		pgk	0.0296597	0.0326174	0.0396009		pgk	0	0	0.0601812		pgk	0	0	0
MXAN_2069	0	0	0.0167615		MXAN_2069	0.0414933	0.0301356	0.0121026		MXAN_2069	0	0	0.0601812		MXAN_2069	0	0	0
MXAN_3680	0	0	0.0235656		MXAN_3680	0.0394791	0	0.00855627		MXAN_3680	0	0	0.0601812		MXAN_3680	0	0	0
MXAN_0986	0	0	0.0252252		MXAN_0986	0.0213006	0.129761	0.0211092		MXAN_0986	0	0	0.0596265		MXAN_0986	0	0	0
MXAN_2457	0	0	0.0275485		MXAN_2457	0.105949	0.140751	0.102985		MXAN_2457	0	0	0.0590718		MXAN_2457	0	0	0
MXAN_2460	0	0	0.0275485		MXAN_2460	0.105949	0.140751	0.102985		MXAN_2460	0	0	0.0590718		MXAN_2460	0	0	0
MXAN_4986	0	0	0.00199146		MXAN_4986	0.00115819	0	0.00064735		MXAN_4986	0	0	0.0590718		MXAN_4986	0	0	0
MXAN_3535	0	0	0.157159		MXAN_3535	0.00513631	0.047508	0.0108924		MXAN_3535	0	0	0.0587945		MXAN_3535	0	0	0
MXAN_5264	0	0	0.00829775		MXAN_5264	0.00412919	0	0.00244867		MXAN_5264	0	0	0.0585172		MXAN_5264	0	0	0
MXAN_2709	0	0	0.0204125		MXAN_2709	0.0404862	0.0350992	0.026091		MXAN_2709	0	0	0.0579625		MXAN_2709	0	0	0
MXAN_0213	0	0	0.19898		MXAN_0213	0.128508	0.106361	0.0470314		MXAN_0213	0	0	0.0574078		MXAN_0213	0	0	0
MXAN_7299	0	0	0.169274		MXAN_7299	0.00488453	0.00744528	0.0203493		MXAN_7299	0	0	0.0574078		MXAN_7299	0	0	0
MXAN_4137	0	1.36709	0.0242294		MXAN_4137	0.157262	0.0418354	0.0793707		MXAN_4137	0	3.85827	0.0568532		MXAN_4137	0	0	0
MXAN_3678	0	0	0.0575864		MXAN_3678	0.0441622	0.0400627	0.0164652		MXAN_3678	0.088163	0	0.0568532		MXAN_3678	0	0	0
MXAN_6488	0	0	0.0532716		MXAN_6488	0.0235666	0	0.0464684		MXAN_6488	0	0	0.0565758		MXAN_6488	0	0	0
MXAN_4412	0	0	0.00165955		MXAN_4412	0.0254298	0.0116997	0.0334652		MXAN_4412	0.125284	0.590551	0.0562985		MXAN_4412	0	0	0
MXAN_7474	0	0	0.022072		MXAN_7474	0.0227609	0	0.0153957		MXAN_7474	0.185606	0	0.0560212		MXAN_7474	0	0	0
ihfA	0	0	0.0252252		ihfA	0.110481	0	0.019139		ihfA	0.30161	0	0.0557438		ihfA	0	0	0
MXAN_2969	0	0	0.0945943		MXAN_2969	0.0300122	0.0067362	0.00681124		MXAN_2969	0.0742425	0	0.0557438		MXAN_2969	0	0	0
MXAN_0933	0	0	0.00647224		MXAN_0933	0.0042299	0.00354537	0.00123841		MXAN_0933	0.0556819	0	0.0557438		MXAN_0933	0	0	0
MXAN_5658	0	0	0.0421526		MXAN_5658	0.019236	0	0.0181821		MXAN_5658	0	0	0.0557438		MXAN_5658	0	0	0
MXAN_0609	0	0	0.0964199		MXAN_0609	0.00402848	0	0.000731786		MXAN_0609	0	0	0.0557438		MXAN_0609	0	0	0
rnpA	0	0	0.0219061		rnpA	0.0335874	0.0514079	0.00655793		rnpA	0	0	0.0554665		rnpA	0	0	0
MXAN_4469	0	0	0.00580842		MXAN_4469	0.00115819	0.00709074	0.000197019		MXAN_4469	0.153125	0	0.0551892		MXAN_4469	0	0	0
MXAN_1731	0	0	0.0292081		MXAN_1731	0.0459246	0.0187905	0.0201523		MXAN_1731	0	0	0.0551892		MXAN_1731	0	0	0
MXAN_2590	0	0	0.0582502		MXAN_2590	0.00916479	0.0187905	0.00689568		MXAN_2590	0	0	0.0551892		MXAN_2590	0	0	0
MXAN_4989	0	0	0.0104552		MXAN_4989	0.00307171	0	0.00298344		MXAN_4989	0.102083	0	0.0546345		MXAN_4989	0	0	0
rpsQ	0	0	0.0233997		rpsQ	0.349722	0.16096	0.143965		rpsQ	0	0	0.0543572		rpsQ	0	0	0
ubiE	0	0	0.047795		ubiE	0.0289043	0.0255267	0.0710396		ubiE	0	0	0.0538025		ubiE	0	0	0
MXAN_4411	0	0	0.00132764		MXAN_4411	0.0299618	0.0368718	0.0603724		MXAN_4411	0.199527	0	0.0535252		MXAN_4411	0	0	0
MXAN_1384	0	0	0.121811		MXAN_1384	0	0	0.0144106		MXAN_1384	1.11364	0	0.0532478		MXAN_1384	0	0	0
MXAN_4041	0	0	0.0783308		MXAN_4041	0.0390259	0.0595622	0.0209685		MXAN_4041	0.0417614	0	0.0532478		MXAN_4041	0	0	0
MXAN_4299	0	0.0234768	0.0175912		MXAN_4299	0.0101215	0	0.0337748		MXAN_4299	0	0	0.0529705		MXAN_4299	0	0	0
MXAN_2276	0	0	0.011119		MXAN_2276	0.00322278	0.0198541	0.0292715		MXAN_2276	0	0	0.0526932		MXAN_2276	0	0	0
map(2)	0	0	0.0189189		map(2)	0.0156607	0.0159542	0.0284834		map(2)	0	0	0.0526932		map(2)	0	0	0
MXAN_0716	0	0	0.175746		MXAN_0716	0.00458239	0.0556623	0.00633277		MXAN_0716	0	0	0.0524158		MXAN_0716	0	0	0
MXAN_6972	0	0	0.0338548		MXAN_6972	0.0176246	0.0453807	0.0140447		MXAN_6972	0	0	0.0524158		MXAN_6972	0	0	0
MXAN_0947	0	0	0.0235656		MXAN_0947	0.00161139	0	0.00202649		MXAN_0947	0	0	0.0524158		MXAN_0947	0	0	0
trx(2)	0	0	0.0451398		trx(2)	0.095626	0.0776436	0.0970461		trx(2)	0	0	0.0521385		trx(2)	0	0	0
MXAN_5186	0	0	0.0112849		MXAN_5186	0.0318753	0	0.00132284		MXAN_5186	0	0	0.0521385		MXAN_5186	0	0	0
MXAN_5151	0	0	0.0172593		MXAN_5151	0.0277461	0	0.0315513		MXAN_5151	0	0	0.0521385		MXAN_5151	0	0	0
MXAN_4292	0	0	0.0237316		MXAN_4292	0.0128911	0.00389991	0.0273294		MXAN_4292	0.0139205	0	0.0518612		MXAN_4292	0	0	0
MXAN_2595	0	0	0.0506163		MXAN_2595	0.0811235	0.0634621	0.106925		MXAN_2595	0.0742425	0	0.0515838		MXAN_2595	0	0	0
MXAN_2067	0	0	0.332906		MXAN_2067	0.200568	0.114515	0.0625677		MXAN_2067	0.385133	0	0.0510292		MXAN_2067	0	0	0
MXAN_6833	0	0	0.0419866		MXAN_6833	0.00196388	0.0120543	0.00531952		MXAN_6833	0	0	0.0510292		MXAN_6833	0	0	0
MXAN_5136	0	0	0.0501184		MXAN_5136	0.100762	0.0393536	0.0363642		MXAN_5136	0.129924	0	0.0504745		MXAN_5136	0	0	0
MXAN_2634	0	0.594312	0.0265528		MXAN_2634	0.20515	0.131533	0.150748		MXAN_2634	0	0	0.0499199		MXAN_2634	0	0	0
MXAN_5591	0	0	0.0353484		MXAN_5591	0.00765411	0	0.0105265		MXAN_5591	0.0464016	0	0.0490879		MXAN_5591	0	0	0
MXAN_4291	0	0	0.0285443		MXAN_4291	0.0210991	0	0.055278		MXAN_4291	0	0	0.0490879		MXAN_4291	0	0	0
coxC(2)	0	0.414323	0.036842		coxC(2)	0.0150564	0.0662984	0.183256		coxC(2)	0.139205	0	0.0488105		coxC(2)	0	0	0
MXAN_6521	0	0	0.0215741		MXAN_6521	0.0451693	0.0155996	0.0526605		MXAN_6521	0	0	0.0488105		MXAN_6521	0	0	0
accB	0	0	0		accB	0.0373641	0.0152451	0.0586836		accB	0	0	0.0482559		accB	0	0	0
MXAN_6572	0	0	0.0545992		MXAN_6572	0.0298107	0	0.0307913		MXAN_6572	0	0	0.0482559		MXAN_6572	0	0	0
MXAN_5594	0	3.78086	0.0160976		MXAN_5594	0.175037	0.109552	0.0393476		MXAN_5594	0	0	0.0479785		MXAN_5594	0	0	0
MXAN_5881	0	0	0.0481269		MXAN_5881	0.105043	0.109552	0.0830578		MXAN_5881	0	0	0.0479785		MXAN_5881	0	0	0
MXAN_5814	0	0	0.0326931		MXAN_5814	0.0781525	0	0.0797366		MXAN_5814	0	0	0.0477012		MXAN_5814	0	0	0
truB(2)	0	0	0.0157657		truB(2)	0.0107762	0.019145	0.00599502		truB(2)	0	0	0.0471465		truB(2)	0	0	0
MXAN_1446	0	0	0.080986		MXAN_1446	0.0871158	0.0397081	0.0756273		MXAN_1446	0	0	0.0468692		MXAN_1446	0	0	0
MXAN_4635	0	0	0.0532716		MXAN_4635	0.0194374	0.0120543	0.059528		MXAN_4635	0	0	0.0468692		MXAN_4635	0	0	0
MXAN_3960	0	0	0.00829775		MXAN_3960	0.0159628	0.0393536	0.00844369		MXAN_3960	0	0	0.0465919		MXAN_3960	0	0	0
MXAN_0248	0	0	0.107207		MXAN_0248	0.0367095	0.0868616	0.00526323		MXAN_0248	0	0	0.0454825		MXAN_0248	0	0	0
MXAN_2856	0	0	0.246775		MXAN_2856	0.168541	0	0.719909		MXAN_2856	0	0	0.0454825		MXAN_2856	0	0	0
MXAN_0776	0	0	0.0250592		MXAN_0776	0.00181281	0.0109906	0.00368708		MXAN_0776	0.148485	0	0.0452052		MXAN_0776	0	0	0
MXAN_6302	0	0	0.0287102		MXAN_6302	0.936017	0.514433	0.496405		MXAN_6302	0	0	0.0449279		MXAN_6302	0	0	0
MXAN_1164	0	0	0.13376		MXAN_1164	0.0254298	0.0627531	0.0309602		MXAN_1164	0	0	0.0449279		MXAN_1164	0	0	0
MXAN_1456	0	0	0.0137743		MXAN_1456	0.00397812	0	0.0215596		MXAN_1456	0.250568	0	0.0446505		MXAN_1456	0	0	0
MXAN_4184	0	0	0.0121147		MXAN_4184	0.0243219	0.0212722	0.0828045		MXAN_4184	0	0	0.0446505		MXAN_4184	0	0	0
nusA	0	0.13434	0.0526077		nusA	0.0324292	0.0173723	0.0299188		nusA	0.143845	0	0.0440959		nusA	0	0	0
MXAN_3758	0	0	0.014604		MXAN_3758	0.430795	0.33681	0.0146357		MXAN_3758	0	0	0.0438185		MXAN_3758	0	0	0
sdhA	0	0	0.0389994		sdhA	0.0391266	0.0311993	0.109487		sdhA	0.0417614	0	0.0435412		sdhA	0	0	0
MXAN_7409	0	0	0.476457		MXAN_7409	0.0139486	0	0.112048		MXAN_7409	0	0	0.0435412		MXAN_7409	0	0	0
rpiB	0	0	0.040659		rpiB	0.00775482	0	0.0405579		rpiB	0	0	0.0435412		rpiB	0	0	0
MXAN_4300	0	0.0502143	0.0155998		MXAN_4300	0.00871158	0	0.0242615		MXAN_4300	0.0556819	0.15748	0.0432639		MXAN_4300	0	0	0
MXAN_2727	0	0	0.018587		MXAN_2727	0.019387	0.00531806	0.0944849		MXAN_2727	0	0	0.0432639		MXAN_2727	0	0	0
MXAN_7510	0	0	0		MXAN_7510	0	0	0		MXAN_7510	0	0	0.0432639		MXAN_7510	0	0	0
MXAN_3743	0	0	0.0308676		MXAN_3743	0.139083	0.214849	0.10974		MXAN_3743	0.088163	0	0.0429865		MXAN_3743	0	0	0
MXAN_2260	0	0.129992	0.0544332		MXAN_2260	0.00407883	0.00850889	0.011399		MXAN_2260	0.0464016	0	0.0427092		MXAN_2260	0	0	0
MXAN_0675	0	0	0.00580842		MXAN_0675	0	0	0.00379966		MXAN_0675	0	0	0.0427092		MXAN_0675	0	0	0
MXAN_2963	0	1.34144	0.0476291		MXAN_2963	0.604473	0.204568	0.0664237		MXAN_2963	0.412974	0	0.0418772		MXAN_2963	0	0	0
MXAN_6458	0	0	0.0592459		MXAN_6458	0.0214013	0	0.00303973		MXAN_6458	0.31089	0	0.0418772		MXAN_6458	0	0	0
MXAN_3796	0	0	0.02954		MXAN_3796	0.00750304	0.0230449	0.0304536		MXAN_3796	0.241288	0	0.0418772		MXAN_3796	0	0	0
MXAN_4208	0	0	0.0343527		MXAN_4208	0.0436083	0.0216268	0.0693508		MXAN_4208	0.116004	0	0.0418772		MXAN_4208	0	0	0
MXAN_0454	0	0	0.0170934		MXAN_0454	0.0328321	0.0602713	0.0224039		MXAN_0454	0	0	0.0418772		MXAN_0454	0	0	0
MXAN_2812	0	0	0.00829775		MXAN_2812	0.0652613	0.0567259	0.041543		MXAN_2812	0	0	0.0418772		MXAN_2812	0	0	0
MXAN_2435	0	0	0.0491227		MXAN_2435	0.0338392	0.0460898	0.0456522		MXAN_2435	0	0	0.0418772		MXAN_2435	0	0	0
mraZ	0	0	0.0262209		mraZ	0.0376159	0.0230449	0.005798		mraZ	0	0	0.0418772		mraZ	0	0	0
MXAN_0580	0	0	0.0114509		MXAN_0580	0.0328321	0.0202086	0.00498178		MXAN_0580	0	0	0.0418772		MXAN_0580	0	0	0
MXAN_7297	0	0	0.0131104		MXAN_7297	0.0150564	0	0.0224602		MXAN_7297	0	0	0.0418772		MXAN_7297	0	0	0
MXAN_6078	0	0	0.0224039		MXAN_6078	0.00654628	0	0.127866		MXAN_6078	0	0	0.0418772		MXAN_6078	0	0	0
panE	0	0	0.0197486		panE	0.00407883	0.00850889	0.00484105		panE	0	0	0.0415999		panE	0	0	0
MXAN_4322	0	0	0.0101233		MXAN_4322	0.00236673	0	0.00346191		MXAN_4322	0	0	0.0415999		MXAN_4322	0	0	0
MXAN_4984	0	0	0.00448078		MXAN_4984	0	0	0.00298344		MXAN_4984	0	0	0.0415999		MXAN_4984	0	0	0
lexA	0	0	0.0497865		lexA	0.0365584	0.0265903	0.0355479		lexA	0.139205	0	0.0413225		lexA	0	0	0
MXAN_2985	0	0	0.0348505		MXAN_2985	0.0313214	0.00850889	0.0411489		MXAN_2985	0	0	0.0413225		MXAN_2985	0	0	0
MXAN_1380	0	0	0.114343		MXAN_1380	0.664648	1.11112	0.062624		MXAN_1380	0	0	0.0407679		MXAN_1380	0	0	0
lipA	0	0	0.0361782		lipA	0.0339903	0.0173723	0.0210529		lipA	0	0	0.0407679		lipA	0	0	0
sdhB	0	0.645178	0.0977475		sdhB	0.0671749	0.0414808	0.126036		sdhB	0	0	0.0402132		sdhB	0	0	0
MXAN_1084	0	0	0.0137743		MXAN_1084	0.0126897	0	0.0884899		MXAN_1084	0	0	0.0402132		MXAN_1084	0	0	0
MXAN_5101	0	0	0.0169274		MXAN_5101	0	0	0.000534767		MXAN_5101	0	1.73228	0.0399359		MXAN_5101	0	0	0
sugE	0	0	0		sugE	0.00649592	0.0393536	0.00135099		sugE	0.399053	0	0.0399359		sugE	0	0	0
tpiA	0	0	0.0199146		tpiA	0.0679302	0.0662984	0.0237268		tpiA	0.236648	0	0.0399359		tpiA	0	0	0
MXAN_4211	0	0	0.055263		MXAN_4211	0.0428026	0.0716165	0.0394883		MXAN_4211	0	0	0.0399359		MXAN_4211	0	0	0
MXAN_0935	0	0.399976	0.0106211		MXAN_0935	0.220056	0.217331	0.0244586		MXAN_0935	0.273769	0	0.0396585		MXAN_0935	0	0	0
sufD	0	0	0.00232337		sufD	0.0156607	0.0514079	0.000788078		sufD	0.060322	0	0.0396585		sufD	0	0	0
MXAN_3079	0	0	0.0192508		MXAN_3079	0.138982	0.341419	0.0268791		MXAN_3079	0	0	0.0396585		MXAN_3079	0	0	0
MXAN_5848	0	0	0.0781648		MXAN_5848	0.03253	0.0287175	0.0333526		MXAN_5848	0	0	0.0396585		MXAN_5848	0	0	0
fabF(2)	0	0	0.0414887		fabF(2)	0.0358031	0.0184359	0.0369271		fabF(2)	0	0	0.0396585		fabF(2)	0	0	0
MXAN_1975	0	0	0		MXAN_1975	0.0302639	0.0939523	0		MXAN_1975	0	0	0.0393812		MXAN_1975	0	0	0
MXAN_0199	0	0	0.0238975		MXAN_0199	0.00891301	0	0.021644		MXAN_0199	0	0	0.0393812		MXAN_0199	0	0	0
MXAN_3533	0	0	0.0401611		MXAN_3533	0.005942	0.00921796	0.0170281		MXAN_3533	0.0510417	0	0.0391039		MXAN_3533	0	0	0
kdsC	0	0	0.0867945		kdsC	0.0417955	0.0453807	0.0158178		kdsC	0	0	0.0391039		kdsC	0	0	0
MXAN_0158	0	0	0.0134424		MXAN_0158	0.0383712	0.0755164	0.0396853		MXAN_0158	0	0	0.0388266		MXAN_0158	0	0	0
MXAN_3702	0	0	0.0212422		MXAN_3702	0.00307171	0.0187905	0.0172533		MXAN_3702	0	0	0.0388266		MXAN_3702	0	0	0
MXAN_5356	0	0	0.0084637		MXAN_5356	0.00488453	0	0.00090066		MXAN_5356	0	0	0.0388266		MXAN_5356	0	0	0
MXAN_1176	0	0.716043	0.0127785		MXAN_1176	0.0149054	0.0113452	0.0398542		MXAN_1176	0.120644	0	0.0385492		MXAN_1176	0	0	0
MXAN_6021	0	0	0.0418207		MXAN_6021	0.0700955	0.0496352	0.0209966		MXAN_6021	0.176326	0	0.0382719		MXAN_6021	0	0	0
MXAN_5349	0	0	0.106875		MXAN_5349	0.0222573	0.0421899	0.0208278		MXAN_5349	0	0	0.0379946		MXAN_5349	0	0	0
MXAN_0476	0	0	0.0272166		MXAN_0476	0.0184806	0.0375809	0.00895031		MXAN_0476	0	0	0.0377172		MXAN_0476	0	0	0
MXAN_5202	0	0	0.0051446		MXAN_5202	0.0358534	0.0365173	0.0184635		MXAN_5202	0	0	0.0377172		MXAN_5202	0	0	0
MXAN_2941	0	0	0.0245613		MXAN_2941	0.00402848	0.0244631	0.00154801		MXAN_2941	0	0	0.0377172		MXAN_2941	0	0	0
MXAN_0773	0	0	0		MXAN_0773	0.0123372	0	0.00256125		MXAN_0773	0	0	0.0377172		MXAN_0773	0	0	0
slyD(2)	0	0	0.00879561		slyD(2)	0.115869	0.0836707	0.058374		slyD(2)	0	0	0.0374399		slyD(2)	0	0	0
MXAN_2456	0	0	0.0463014		MXAN_2456	0.0266383	0.0315538	0.0538707		MXAN_2456	0	0	0.0374399		MXAN_2456	0	0	0
MXAN_4864	0	0.12021	0.0250592		MXAN_4864	0.0385223	0.0155996	0.0457367		MXAN_4864	0	0	0.0374399		MXAN_4864	0	0	0
MXAN_0441	0	0	0.0225699		MXAN_0441	0.00735197	0.0216268	0.00593873		MXAN_0441	0	0.23622	0.0371626		MXAN_0441	0	0	0
slyD(1)	0	0.656917	0.00298719		slyD(1)	0.0202431	0.0205631	0.0333807		slyD(1)	0.218087	0	0.0371626		slyD(1)	0	0	0
MXAN_5001	0	0	0.0326931		MXAN_5001	0.0312711	0.0386445	0.00529138		MXAN_5001	0.060322	0	0.0371626		MXAN_5001	0	0	0
gcvH	0	0	0.0716926		gcvH	0.0528234	0.0294266	0.179063		gcvH	0	0	0.0371626		gcvH	0	0	0
pheS	0	0	0.0270507		pheS	0.0183799	0.0152451	0.0301158		pheS	0.0835228	0	0.0368852		pheS	0	0	0
MXAN_4866	0	0	0.022072		MXAN_4866	0.0209984	0.0287175	0.0460463		MXAN_4866	0	0	0.0368852		MXAN_4866	0	0	0
MXAN_1444	0	0	0.0328591		MXAN_1444	0.00639521	0	0.00500992		MXAN_1444	0	0	0.0368852		MXAN_1444	0	0	0
MXAN_0303	0	0.245202	0.0960879		MXAN_0303	0.0384216	0.0553078	0.021644		MXAN_0303	0	0	0.0366079		MXAN_0303	0	0	0
panB	0	0	0.0502844		panB	0.0316739	0.0354537	0.0361671		panB	0	0	0.0366079		panB	0	0	0
panD	0	0	0.0456376		panD	0.0331846	0.029072	0.0292433		panD	0	0	0.0366079		panD	0	0	0
MXAN_6832	0	0	0.0199146		MXAN_6832	0.00231637	0.0141815	0.00295529		MXAN_6832	0	0	0.0366079		MXAN_6832	0	0	0
MXAN_2710	0	0	0.0385016		MXAN_2710	0.0166678	0	0.0529982		MXAN_2710	0	0	0.0363306		MXAN_2710	0	0	0
MXAN_1125	0	0	0.00398292		MXAN_1125	0.00120854	0	0.000422185		MXAN_1125	0	0	0.0360532		MXAN_1125	0	0	0
MXAN_6753	0	0	0.00862966		MXAN_6753	0.131681	0.219458	0.00225165		MXAN_6753	0.0974433	0	0.0357759		MXAN_6753	0	0	0
MXAN_4043	0	0	0.025889		MXAN_4043	0.20802	0.326529	0.00681124		MXAN_4043	0	0	0.0357759		MXAN_4043	0	0	0
secF	0	0.204118	0.018255		secF	0.0245737	0.0067362	0.0759932		secF	0	0	0.0357759		secF	0	0	0
MXAN_4385	0	0	0.0162636		MXAN_4385	0.0323285	0.0563714	0.0430628		MXAN_4385	0	0	0.0354986		MXAN_4385	0	0	0
MXAN_3764	0	0.48497	0.108037		MXAN_3764	0.137975	0.0155996	0.306309		MXAN_3764	0	0	0.0354986		MXAN_3764	0	0	0
MXAN_5724	0	0	0		MXAN_5724	0.252737	0	0.0674088		MXAN_5724	0	0	0.0354986		MXAN_5724	0	0	0
adk	0	0	0.0212422		adk	0.0493488	0.0414808	0.0359983		adk	0	0	0.0352212		adk	0	0	0
trxB(1)	0	0	0.0660501		trxB(1)	0.0651606	0.13437	0.0297218		trxB(1)	0	0.866142	0.0343892		trxB(1)	0	0	0
MXAN_4033	0	0	0.0871264		MXAN_4033	0.30128	0.337874	0.0686191		MXAN_4033	0	0	0.0343892		MXAN_4033	0	0	0
MXAN_1983	0	0	0.0356803		MXAN_1983	0.0159628	0.146069	0.0173096		MXAN_1983	0	0	0.0343892		MXAN_1983	0	0	0
MXAN_5315	0	0	0.011119		MXAN_5315	0.0115315	0	0.0314668		MXAN_5315	0	0	0.0343892		MXAN_5315	0	0	0
MXAN_2733	0	0	0.0351825		MXAN_2733	0.0380188	0.0166632	0.0609916		MXAN_2733	0.176326	0	0.0338346		MXAN_2733	0	0	0
MXAN_5806	0	0.176294	0.0180891		MXAN_5806	0.0544852	0.0226904	0.00996355		MXAN_5806	0.060322	0	0.0338346		MXAN_5806	0	0	0
rimM	0	0	0.00464674		rimM	0.0161643	0.0329719	0.00149172		rimM	0	1.65354	0.0335572		rimM	0	0	0
MXAN_5074	0	0	0.0139402		MXAN_5074	0.0234659	0.0953705	0.00844369		MXAN_5074	0.473296	0	0.0335572		MXAN_5074	0	0	0
crt(1)	0	0	0.0212422		crt(1)	0.0194878	0.0219813	0.0412615		crt(1)	0.116004	0	0.0335572		crt(1)	0	0	0
MXAN_1109	0	0	0.0160976		MXAN_1109	0.0092655	0	0.0290463		MXAN_1109	0	0	0.0335572		MXAN_1109	0	0	0
MXAN_1937	0	0	0.0471312		MXAN_1937	0.0650096	0.0443171	0.00622018		MXAN_1937	0.232008	0	0.0332799		MXAN_1937	0	0	0
MXAN_2035	0	0.211074	0.0179231		MXAN_2035	0.0309186	0.0205631	0.072278		MXAN_2035	0	0	0.0332799		MXAN_2035	0	0	0
MXAN_1310	0	0	0.0403271		MXAN_1310	0.00523702	0.0106361	0.00188576		MXAN_1310	0.116004	0	0.0330026		MXAN_1310	0	0	0
aceB	0	0	0.0464674		aceB	0.0414933	0.0549532	0.00090066		aceB	0	0	0.0330026		aceB	0	0	0
murE	0	0	0.0127785		murE	0.0518163	0.0492806	0.071321		murE	0	0	0.0330026		murE	0	0	0
MXAN_6979	0	0	0.113181		MXAN_6979	0.00191353	0.00567259	0.00689568		MXAN_6979	0	0	0.0330026		MXAN_6979	0	0	0
MXAN_5562	0	0	0.0107871		MXAN_5562	0.0114812	0.0141815	0.0480165		MXAN_5562	0.0742425	0	0.0327252		MXAN_5562	0	0	0
MXAN_1083	0	0	0.00680415		MXAN_1083	0.00765411	0	0.0989882		MXAN_1083	0	0	0.0327252		MXAN_1083	0	0	0
MXAN_4534	0	0	0.0288762		MXAN_4534	0.00206459	0	0.0104139		MXAN_4534	0	0	0.0327252		MXAN_4534	0	0	0
MXAN_4564	0	0	0.0229018		MXAN_4564	0.0294582	0.00779981	0.0913326		MXAN_4564	0	0	0.0324479		MXAN_4564	0	0	0
MXAN_2978	0	0	0.0609055		MXAN_2978	0.164614	0.253494	0.0121026		MXAN_2978	0.148485	0	0.0321706		MXAN_2978	0	0	0
MXAN_5702	0	0	0.0270507		MXAN_5702	0.00740233	0.0326174	0.00424999		MXAN_5702	0	0	0.0318932		MXAN_5702	0	0	0
MXAN_1240	0	0	0		MXAN_1240	0.0160636	0	0.0184917		MXAN_1240	0	0	0.0318932		MXAN_1240	0	0	0
MXAN_6103	0	0	0.0141062		MXAN_6103	0.00533773	0	0.00759932		MXAN_6103	0	0	0.0318932		MXAN_6103	0	0	0
MXAN_4031	0	0	0.0066382		MXAN_4031	0	0	0.0096821		MXAN_4031	0	0	0.0318932		MXAN_4031	0	0	0
bktB	0	0	0.0232337		bktB	0.030415	0.0389991	0.0432598		bktB	0.139205	0	0.0316159		bktB	0	0	0
MXAN_4900	0	0	0.0277145		MXAN_4900	0.0589668	0.0457353	0.190856		MXAN_4900	0	0	0.0316159		MXAN_4900	0	0	0
mglB	0	0	0.0418207		mglB	0.0275447	0.0209177	0.0399949		mglB	0	0	0.0316159		mglB	0	0	0
def(2)	0	0	0		def(2)	0.0323285	0.0180814	0.0230794		def(2)	0	0	0.0316159		def(2)	0	0	0
MXAN_4084	0	0	0.00630629		MXAN_4084	0.0042299	0.00638167	0.00146357		MXAN_4084	0	0	0.0316159		MXAN_4084	0	0	0
MXAN_7088	0	0	0		MXAN_7088	0.0385727	0	0.0151705		MXAN_7088	0	0	0.0316159		MXAN_7088	0	0	0
frzZ	0	0	0.0600757		frzZ	0.00916479	0.028363	0.0135943		frzZ	0	0	0.0313386		frzZ	0	0	0
sufB	0	0	0.0129445		sufB	0.0187324	0.0209177	0.00340562		sufB	0	0	0.0310612		sufB	0	0	0
rph	0	0	0.022072		rph	0.0118337	0.0244631	0.0217284		rph	0	0	0.0307839		rph	0	0	0
tig	0	0.185858	0.00912752		tig	0.0252787	0.0241085	0.0356042		tig	0	0	0.0307839		tig	0	0	0
MXAN_2602	0	0.481492	0.0278804		MXAN_2602	0.019941	0.0152451	0.0242897		MXAN_2602	0	0	0.0307839		MXAN_2602	0	0	0
ychF	0	0	0.0253911		ychF	0.0194878	0.0141815	0.0313261		ychF	0	0	0.0307839		ychF	0	0	0
MXAN_4384	0	0	0.0167615		MXAN_4384	0.0195885	0.00992704	0.0259503		MXAN_4384	0	0	0.0307839		MXAN_4384	0	0	0
secY	0	0.174989	0.0187529		secY	0.0311703	0.0170178	0.068028		secY	0.060322	0	0.0305066		secY	0	0	0
MXAN_6542	0	0	0.00448078		MXAN_6542	0.0103733	0.0159542	0.0016043		MXAN_6542	0	0	0.0305066		MXAN_6542	0	0	0
MXAN_5106	0	0	0		MXAN_5106	0.00241709	0	0.00253311		MXAN_5106	0	0	0.0305066		MXAN_5106	0	0	0
pheT	0	0	0.022072		pheT	0.0113804	0.014536	0.015846		pheT	0.0974433	0	0.0302292		pheT	0	0	0
carA	0	0	0.00862966		carA	0.0169196	0.0209177	0.0158178		carA	0	0	0.0302292		carA	0	0	0
MXAN_4145	0	0	0.0101233		MXAN_4145	0.0109272	0.0113452	0.00523509		MXAN_4145	0	0	0.0302292		MXAN_4145	0	0	0
rimI	0	0	0.0142721		rimI	0.00327314	0	0.00683939		rimI	0	0	0.0299519		rimI	0	0	0
MXAN_1120	0	0	0.0084637		MXAN_1120	0.00246744	0	0.00315231		MXAN_1120	0	0	0.0299519		MXAN_1120	0	0	0
MXAN_0038	0	0	0.0199146		MXAN_0038	0	0	0.00123841		MXAN_0038	0	0	0.0299519		MXAN_0038	0	0	0
MXAN_3803	0	0	0.0129445		MXAN_3803	0.0129415	0.0365173	0.0257814		MXAN_3803	0.0788827	0	0.0296746		MXAN_3803	0	0	0
MXAN_5089	0	0	0.0126126		MXAN_5089	0.0213006	0	0.0226009		MXAN_5089	0	0	0.0296746		MXAN_5089	0	0	0
MXAN_7092	0	0	0.0253911		MXAN_7092	0.00976906	0	0.00368708		MXAN_7092	0	0	0.0296746		MXAN_7092	0	0	0
MXAN_0475	0	0	0.0252252		MXAN_0475	0	0	0.00754303		MXAN_0475	0	0	0.0296746		MXAN_0475	0	0	0
gyrB	0	0	0.0224039		gyrB	0.0360549	0.0294266	0.0526886		gyrB	0.0649622	0	0.0293972		gyrB	0	0	0
MXAN_5722	0	0	0.0328591		MXAN_5722	0.0121358	0	0.00281456		MXAN_5722	0	0	0.0293972		MXAN_5722	0	0	0
MXAN_2074	0	0	0.0336889		MXAN_2074	0.0017121	0	0.000309602		MXAN_2074	0	0	0.0293972		MXAN_2074	0	0	0
MXAN_6592	0	0	0.0164295		MXAN_6592	0.0163153	0.0333265	0.0221788		MXAN_6592	0	0	0.0291199		MXAN_6592	0	0	0
MXAN_4636	0	0	0.070199		MXAN_4636	0.0899861	0.0304902	0.124347		MXAN_4636	0	0	0.0291199		MXAN_4636	0	0	0
MXAN_3170	0	0	0.0104552		MXAN_3170	0.0454211	0.0304902	0.0103576		MXAN_3170	0.0835228	0	0.0288426		MXAN_3170	0	0	0
MXAN_5688	0	0	0.0389994		MXAN_5688	0.0296093	0	0.0305943		MXAN_5688	0	0	0.0288426		MXAN_5688	0	0	0
MXAN_7415	0	0	0.0376718		MXAN_7415	0.00654628	0.0407718	0.00568542		MXAN_7415	0.0556819	0	0.0285652		MXAN_7415	0	0	0
MXAN_4180	0	0	0.00697011		MXAN_4180	0.0287029	0.0152451	0.0368145		MXAN_4180	0.0556819	0	0.0285652		MXAN_4180	0	0	0
MXAN_6918	0	0	0.0033191		MXAN_6918	0.00382705	0	0.00149172		MXAN_6918	0	0	0.0285652		MXAN_6918	0	0	0
MXAN_4867	0	0.234768	0.0433143		MXAN_4867	0.0462268	0.019145	0.0932465		MXAN_4867	0.0417614	0.393701	0.0282879		MXAN_4867	0	0	0
gloA	0	0	0.00431483		gloA	0.0632471	0.0297811	0.00681124		gloA	0	0	0.0282879		gloA	0	0	0
MXAN_0548	0	0	0.00464674		MXAN_0548	0.0239191	0.0163087	0.0772316		MXAN_0548	0	0	0.0282879		MXAN_0548	0	0	0
MXAN_6033	0	0	0.00431483		MXAN_6033	0.00488453	0	0.0262599		MXAN_6033	0	0	0.0282879		MXAN_6033	0	0	0
MXAN_0473	0	0	0.0199146		MXAN_0473	0	0	0.00954137		MXAN_0473	0	0	0.0282879		MXAN_0473	0	0	0
MXAN_2726	0	0.347153	0.0401611		MXAN_2726	0.0216531	0.0109906	0.103069		MXAN_2726	0	0	0.0280106		MXAN_2726	0	0	0
MXAN_6849	0	0	0.143053		MXAN_6849	0.174634	0.12267	0.0932746		MXAN_6849	0	0	0.0277333		MXAN_6849	0	0	0
MXAN_0125	0	0	0.00215741		MXAN_0125	0.00261851	0.0319083	0.00239238		MXAN_0125	0	0	0.0277333		MXAN_0125	0	0	0
htpG	0	0	0.0243954		htpG	0.0144522	0.0223358	0.0410645		htpG	0	0	0.0277333		htpG	0	0	0
fumC	0	0	0.0194167		fumC	0.0105244	0.0163087	0.0054884		fumC	0	0	0.0277333		fumC	0	0	0
MXAN_0090	0	0	0.00896157		MXAN_0090	0.0311703	0.0159542	0.0201804		MXAN_0090	0	0	0.0277333		MXAN_0090	0	0	0
MXAN_1016	0	0	0.0119488		MXAN_1016	0	0	0.00847184		MXAN_1016	0	0	0.0277333		MXAN_1016	0	0	0
MXAN_2518	0	0	0.010953		MXAN_2518	0.01556	0.028363	0.0167185		MXAN_2518	0	0	0.0274559		MXAN_2518	0	0	0
MXAN_3848	0	0	0.0602417		MXAN_3848	0.00820802	0.019145	0.00106953		MXAN_3848	0	0	0.0274559		MXAN_3848	0	0	0
MXAN_7408	0	0	0.170104		MXAN_7408	0.0257823	0	0.0308195		MXAN_7408	0	0	0.0274559		MXAN_7408	0	0	0
MXAN_2912	0	0	0.0233997		MXAN_2912	0.0150564	0.0184359	0.00112583		MXAN_2912	0.194887	0	0.0271786		MXAN_2912	0	0	0
MXAN_2470	0	0	0.0187529		MXAN_2470	0.0283001	0.0095725	0.0586555		MXAN_2470	0.0510417	0	0.0271786		MXAN_2470	0	0	0
MXAN_0865	0	0	0		MXAN_0865	0.0399323	0.0790618	0.00340562		MXAN_0865	0	0	0.0271786		MXAN_0865	0	0	0
msrA	0	0	0.0151019		msrA	0.0264369	0.0542442	0.0196457		msrA	0	0	0.0269013		msrA	0	0	0
MXAN_6020	0	0	0.0134424		MXAN_6020	0.0191856	0.042899	0.00748674		MXAN_6020	0	0	0.0269013		MXAN_6020	0	0	0
aroF	0	0	0.0433143		aroF	0.0232141	0.0358082	0.0113145		aroF	0	0	0.0269013		aroF	0	0	0
MXAN_2526	0	0	0		MXAN_2526	0.0447665	0	0.0587681		MXAN_2526	0	0	0.0269013		MXAN_2526	0	0	0
surE	0	0	0.0149359		surE	0.0347456	0	0.0298344		surE	0	0	0.0269013		surE	0	0	0
MXAN_0282	0	0	0.0670458		MXAN_0282	0.0149054	0	0.0246274		MXAN_0282	0	0	0.0269013		MXAN_0282	0	0	0
MXAN_4296	0	0	0.00481269		MXAN_4296	0.00730162	0	0.0284552		MXAN_4296	0	0.15748	0.0266239		MXAN_4296	0	0	0
coaE	0	0	0.0107871		coaE	0.0025178	0.0155996	0.00971024		coaE	0	0	0.0266239		coaE	0	0	0
MXAN_3788	0	0	0.0121147		MXAN_3788	0.0092655	0	0.0110049		MXAN_3788	0	0	0.0266239		MXAN_3788	0	0	0
MXAN_2410	0	0	0.00580842		MXAN_2410	0	0	0.0108642		MXAN_2410	0	0	0.0266239		MXAN_2410	0	0	0
MXAN_6852	0	0	0.0557609		MXAN_6852	0.0432558	0.066653	0.0125811		MXAN_6852	0.139205	0	0.0263466		MXAN_6852	0	0	0
astB	0	0	0.0199146		astB	0.0205956	0.0116997	0.0138195		astB	0.060322	0	0.0263466		astB	0	0	0
gcvP	0	0	0.0353484		gcvP	0.0157614	0.00496352	0.0453426		gcvP	0.0278409	0	0.0263466		gcvP	0	0	0
MXAN_3083	0	0	0.00315314		MXAN_3083	0.00715055	0.0439626	0.0150579		MXAN_3083	0	0	0.0263466		MXAN_3083	0	0	0
MXAN_0337	0	0	0.0119488		MXAN_0337	0.0228113	0.0280084	0.00360264		MXAN_0337	0	0	0.0263466		MXAN_0337	0	0	0
MXAN_2525	0	0	0.00315314		MXAN_2525	0.0178764	0	0.0308195		MXAN_2525	0	0	0.0263466		MXAN_2525	0	0	0
MXAN_3720	0	0	0		MXAN_3720	0.00281993	0	0.0160993		MXAN_3720	0	0	0.0263466		MXAN_3720	0	0	0
MXAN_3745	0	0	0.00215741		MXAN_3745	0.0688366	0.120897	0.0411208		MXAN_3745	0	0	0.0260693		MXAN_3745	0	0	0
MXAN_1085	0	0.175859	0.0227358		MXAN_1085	0.0239694	0.0113452	0.0806935		MXAN_1085	0	0	0.0260693		MXAN_1085	0	0	0
MXAN_2839	0	0	0.00431483		MXAN_2839	0	0	0.00500992		MXAN_2839	0	0	0.0260693		MXAN_2839	0	0	0
MXAN_1561	0	0	0.018421		MXAN_1561	0.0395798	0.0315538	0.0051788		MXAN_1561	0	0	0.0257919		MXAN_1561	0	0	0
MXAN_5357	0	0.197814	0.00879561		MXAN_5357	0	0	0.000365893		MXAN_5357	0	0	0.0257919		MXAN_5357	0	0	0
MXAN_6034	0	0	0.0141062		MXAN_6034	0.0149054	0.0102816	0.0606257		MXAN_6034	0	1.06299	0.0255146		MXAN_6034	0	0	0
MXAN_3051	0	0	0.022238		MXAN_3051	0.0626932	0	0.0677747		MXAN_3051	0.385133	0	0.0255146		MXAN_3051	0	0	0
MXAN_6081	0	0	0.02954		MXAN_6081	0.0341413	0.0173723	0.163892		MXAN_6081	0	0	0.0255146		MXAN_6081	0	0	0
MXAN_6079	0	0.0680393	0.0194167		MXAN_6079	0.016416	0.00886343	0.111851		MXAN_6079	0	0	0.0255146		MXAN_6079	0	0	0
MXAN_4423	0	0	0		MXAN_4423	0.054183	0	0.00743045		MXAN_4423	0	0	0.0255146		MXAN_4423	0	0	0
MXAN_3023	0	0	0.0250592		MXAN_3023	0.0266887	0	0.0258095		MXAN_3023	0	0	0.0255146		MXAN_3023	0	0	0
sufS	0	0	0.00431483		sufS	0.013294	0	0.0016043		sufS	0	0	0.0255146		sufS	0	0	0
MXAN_4699	0	0	0.0229018		MXAN_4699	0.026034	0.0276539	0.0535048		MXAN_4699	0.060322	0	0.0252373		MXAN_4699	0	0	0
MXAN_5707	0	0	0.0268847		MXAN_5707	0.0307675	0	0.0623426		MXAN_5707	0	0	0.0252373		MXAN_5707	0	0	0
MXAN_4577	0	0	0.0267188		MXAN_4577	0.00478382	0	0.0166622		MXAN_4577	0	0	0.0252373		MXAN_4577	0	0	0
clpA	0	0	0.0124466		clpA	0.0431551	0.0599168	0.0149735		clpA	0.0696023	0	0.0249599		clpA	0	0	0
rsmB	0	0	0.00962539		rsmB	0.00750304	0.00567259	0.00638906		rsmB	0.0649622	0	0.0249599		rsmB	0	0	0
MXAN_7038	0	0	0.0106211		MXAN_7038	0.0348967	0.0886343	0.00484105		MXAN_7038	0	0	0.0249599		MXAN_7038	0	0	0
MXAN_4123	0	0	0.0273826		MXAN_4123	0.00322278	0.0067362	0.000928806		MXAN_4123	0	0	0.0249599		MXAN_4123	0	0	0
MXAN_0605	0	0	0.010953		MXAN_0605	0.0123372	0	0.0230231		MXAN_0605	0	0	0.0249599		MXAN_0605	0	0	0
MXAN_4414	0	0	0.00165955		MXAN_4414	0.00740233	0.00567259	0.0255844		MXAN_4414	0.0139205	0.0787402	0.0246826		MXAN_4414	0	0	0
MXAN_4947	0	0	0.0761733		MXAN_4947	0.0248255	0.0340356	0.0768939		MXAN_4947	0.176326	0	0.0246826		MXAN_4947	0	0	0
MXAN_4148	0	0	0.0373399		MXAN_4148	0.034947	0.0631076	0.0178162		MXAN_4148	0.0974433	0	0.0246826		MXAN_4148	0	0	0
MXAN_6534	0	0	0.0439781		MXAN_6534	0.0067477	0.0205631	0.00962581		MXAN_6534	0	0	0.0246826		MXAN_6534	0	0	0
MXAN_5319	0	0.087386	0.0101233		MXAN_5319	0.0183296	0.0028363	0.0141291		MXAN_5319	0	0	0.0246826		MXAN_5319	0	0	0
MXAN_0784	0	0	0.0424845		MXAN_0784	0.00584129	0	0.0025894		MXAN_0784	0	0	0.0246826		MXAN_0784	0	0	0
mmgB	0	0	0.00945943		mmgB	0.0253291	0.0294266	0.0262317		mmgB	0	0	0.0244053		mmgB	0	0	0
MXAN_4906	0	0	0.00945943		MXAN_4906	0.116071	0	0.0192235		MXAN_4906	0	0	0.0244053		MXAN_4906	0	0	0
MXAN_4154	0	0	0.0134424		MXAN_4154	0.0100712	0	0.00382781		MXAN_4154	0	0	0.0244053		MXAN_4154	0	0	0
MXAN_5109	0	0	0.00199146		MXAN_5109	0.00725126	0	0.0110331		MXAN_5109	0	0	0.0244053		MXAN_5109	0	0	0
MXAN_3822	0	0	0.00298719		MXAN_3822	0.00100712	0	0.000422185		MXAN_3822	0.0324811	0	0.0241279		MXAN_3822	0	0	0
MXAN_5127	0	0	0.100735		MXAN_5127	0.0421479	0.0808344	0.120745		MXAN_5127	0	0	0.0241279		MXAN_5127	0	0	0
MXAN_0924	0	0	0.0099573		MXAN_0924	0.0506077	0.0709074	0.0819882		MXAN_0924	0	0	0.0241279		MXAN_0924	0	0	0
nadA	0	0	0.0385016		nadA	0.0183296	0.0262357	0.0247119		nadA	0.0928031	0	0.0238506		nadA	0	0	0
fadJ(1)	0	0.198684	0.00979134		fadJ(1)	0.0871158	0.113097	0.00287085		fadJ(1)	0.0696023	0	0.0238506		fadJ(1)	0	0	0
MXAN_4066	0	0	0.00580842		MXAN_4066	0.0113804	0.0138269	0.00247682		MXAN_4066	0	0	0.0238506		MXAN_4066	0	0	0
MXAN_2448	0	0	0.018587		MXAN_2448	0.0102726	0	0.0093162		MXAN_2448	0	0	0.0238506		MXAN_2448	0	0	0
MXAN_0450	0	0	0.0310336		MXAN_0450	0.00302136	0.0124088	0.0310446		MXAN_0450	0.0696023	0	0.0235733		MXAN_0450	0	0	0
tesB	0	0	0.0144381		tesB	0.0184303	0.0379355	0.0101043		tesB	0	0	0.0235733		tesB	0	0	0
MXAN_0874	0	0	0.00763393		MXAN_0874	0.0291561	0.0138269	0.0114553		MXAN_0874	0	0	0.0235733		MXAN_0874	0	0	0
MXAN_3776	0	0	0.0212422		MXAN_3776	0.00896336	0	0.0286523		MXAN_3776	0	0	0.0235733		MXAN_3776	0	0	0
trpD	0	0	0.00431483		trpD	0.0012589	0	0.0035745		trpD	0	0	0.0235733		trpD	0	0	0
MXAN_6005	0	0	0.0104552		MXAN_6005	0	0	0.00484105		MXAN_6005	0	0	0.0235733		MXAN_6005	0	0	0
secD	0	0.385194	0.0137743		secD	0.0188835	0.00425444	0.0485231		secD	0.088163	0	0.0232959		secD	0	0	0
kamD	0	0.149121	0.0106211		kamD	0.0226602	0.00496352	0.0443294		kamD	0.0510417	0	0.0232959		kamD	0	0	0
MXAN_0863	0	0	0.00431483		MXAN_0863	0.0224588	0.0258812	0.00374337		MXAN_0863	0	0	0.0232959		MXAN_0863	0	0	0
MXAN_7389	0	0	0.0321953		MXAN_7389	0.0287029	0.0251721	0.0327897		MXAN_7389	0	0	0.0232959		MXAN_7389	0	0	0
MXAN_1461	0	0	0.0152679		MXAN_1461	0.0520177	0	0.0450893		MXAN_1461	0	0	0.0232959		MXAN_1461	0	0	0
MXAN_6252	0	0	0.0393313		MXAN_6252	0.00407883	0	0.00959766		MXAN_6252	0	0	0.0232959		MXAN_6252	0	0	0
tldD	0	0	0.00481269		tldD	0.0106755	0.0152451	0.008697		tldD	0.0556819	0	0.0230186		tldD	0	0	0
MXAN_1080	0	0	0.0197486		MXAN_1080	0.019387	0.00496352	0.0689005		MXAN_1080	0.0510417	0	0.0230186		MXAN_1080	0	0	0
MXAN_2995	0	0	0.0307017		MXAN_2995	0.0263362	0.0712619	0.0183791		MXAN_2995	0	0	0.0230186		MXAN_2995	0	0	0
MXAN_6225	0	0.218465	0.182882		MXAN_6225	0.0525716	0.0354537	0.159389		MXAN_6225	0	0	0.0230186		MXAN_6225	0	0	0
MXAN_1175	0	0	0.0162636		MXAN_1175	0.00951728	0.0116997	0.00923177		MXAN_1175	0	0	0.0230186		MXAN_1175	0	0	0
MXAN_1358	0	0	0.0200806		MXAN_1358	0.00513631	0.0159542	0.00762747		MXAN_1358	0	0	0.0227413		MXAN_1358	0	0	0
MXAN_4107	0	0	0.0434802		MXAN_4107	0.0050356	0.00460898	0.0437665		MXAN_4107	0	0	0.0227413		MXAN_4107	0	0	0
MXAN_4236	0	0	0.0672118		MXAN_4236	0.0202935	0	0.198117		MXAN_4236	0	0	0.0227413		MXAN_4236	0	0	0
MXAN_1177	0	0	0		MXAN_1177	0.00538809	0	0.00526323		MXAN_1177	0	0	0.0227413		MXAN_1177	0	0	0
MXAN_6731	0	0	0.0051446		MXAN_6731	0.002971	0	0.00633277		MXAN_6731	0	0	0.0227413		MXAN_6731	0	0	0
MXAN_5742	0	0	0.0101233		MXAN_5742	0	0	0.0454552		MXAN_5742	0	0	0.0227413		MXAN_5742	0	0	0
MXAN_6276	0	0	0.0350165		MXAN_6276	0.00312207	0	0.00762747		MXAN_6276	0.399053	0	0.0224639		MXAN_6276	0	0	0
MXAN_2719	0	0	0.0385016		MXAN_2719	0.497366	0.24534	0.0452019		MXAN_2719	0	0	0.0224639		MXAN_2719	0	0	0
MXAN_2740	0	0	0.0174253		MXAN_2740	0.0401337	0.0982068	0.0358575		MXAN_2740	0	0	0.0224639		MXAN_2740	0	0	0
MXAN_0875	0	0	0.00431483		MXAN_0875	0.0201927	0.0155996	0.00371522		MXAN_0875	0	0	0.0224639		MXAN_0875	0	0	0
recR	0	0	0.00431483		recR	0.0101215	0.0155996	0.00745859		recR	0	0	0.0224639		recR	0	0	0
yajC	0	0	0.00497865		yajC	0.0224084	0	0.0137351		yajC	0	0	0.0224639		yajC	0	0	0
MXAN_2810	0	0	0		MXAN_2810	0.00402848	0	0.00154801		MXAN_2810	0	0	0.0224639		MXAN_2810	0	0	0
MXAN_3783	0	0	0.0160976		MXAN_3783	0.00307171	0	0.00928806		MXAN_3783	0	0	0.0224639		MXAN_3783	0	0	0
MXAN_4269	0	0	0		MXAN_4269	0.00307171	0	0.00928806		MXAN_4269	0	0	0.0224639		MXAN_4269	0	0	0
MXAN_1760	0	0	0.00531056		MXAN_1760	0	0	0		MXAN_1760	0	0	0.0224639		MXAN_1760	0	0	0
MXAN_2748	0	0.310851	0.022072		MXAN_2748	0.00322278	0.0198541	0.00461588		MXAN_2748	0	0	0.0221866		MXAN_2748	0	0	0
MXAN_3476	0	0	0		MXAN_3476	0	0	0.0132003		MXAN_3476	0	0	0.0221866		MXAN_3476	0	0	0
MXAN_6434	0	0	0.0155998		MXAN_6434	0.0054888	0.0223358	0.00588244		MXAN_6434	0	0	0.0219093		MXAN_6434	0	0	0
MXAN_2728	0	0	0.0144381		MXAN_2728	0.03112	0.0138269	0.0775975		MXAN_2728	0	0	0.0219093		MXAN_2728	0	0	0
MXAN_4825	0	0	0.00232337		MXAN_4825	0.000906407	0	0.00126655		MXAN_4825	0	0	0.0219093		MXAN_4825	0	0	0
MXAN_5402	0	0	0.0162636		MXAN_5402	0.00871158	0.0163087	0.0074023		MXAN_5402	0.060322	0	0.0216319		MXAN_5402	0	0	0
MXAN_2409	0	0	0.00481269		MXAN_2409	0.0108769	0.0333265	0.00551654		MXAN_2409	0	0	0.0216319		MXAN_2409	0	0	0
MXAN_1081	0	0.263245	0.0240635		MXAN_1081	0.0137975	0.00425444	0.101887		MXAN_1081	0	0	0.0216319		MXAN_1081	0	0	0
MXAN_5930	0	0	0.0343527		MXAN_5930	0.0286525	0	0.00855627		MXAN_5930	0	0	0.0216319		MXAN_5930	0	0	0
deoC	0	0	0.0018255		deoC	0.0104237	0	0.018942		deoC	0	0	0.0216319		deoC	0	0	0
MXAN_6540	0	0	0.0149359		MXAN_6540	0	0	0		MXAN_6540	0	0	0.0216319		MXAN_6540	0	0	0
pep	0	0.108254	0.0169274		pep	0.026739	0.0705529	0.0641439		pep	0	0.354331	0.0213546		pep	0	0	0
MXAN_3647	0	0	0.158321		MXAN_3647	0	0	0		MXAN_3647	0.116004	0	0.0213546		MXAN_3647	0	0	0
aroF(2)	0	0	0.0117828		aroF(2)	0.00881229	0	0.0130596		aroF(2)	0	0	0.0210773		aroF(2)	0	0	0
MXAN_3489	0	0	0.0250592		MXAN_3489	0	0.0567259	0.00622018		MXAN_3489	0	0	0.0207999		MXAN_3489	0	0	0
MXAN_0093	0	0	0.0232337		MXAN_0093	0.0158621	0.0322629	0.0470595		MXAN_0093	0	0	0.0207999		MXAN_0093	0	0	0
dnaJ	0	0	0.0297059		dnaJ	0.0179771	0.0276539	0.0321142		dnaJ	0	0	0.0207999		dnaJ	0	0	0
MXAN_4336	0	0	0.0167615		MXAN_4336	0.0279476	0	0.0228543		MXAN_4336	0	0	0.0207999		MXAN_4336	0	0	0
MXAN_0718	0	0	0.0399952		MXAN_0718	0	0	0.00295529		MXAN_0718	0	0	0.0207999		MXAN_0718	0	0	0
MXAN_1818	0	0	0.00829775		MXAN_1818	0	0	0.00208278		MXAN_1818	0	0	0.0207999		MXAN_1818	0	0	0
MXAN_5366	0	0	0.0116168		MXAN_5366	0.00407883	0.0166632	0.00360264		MXAN_5366	0	0.866142	0.0205226		MXAN_5366	0	0	0
atpG	0	0	0.0051446		atpG	0.0240702	0.00921796	0.0256407		atpG	0	0	0.0205226		atpG	0	0	0
hemE	0	0	0.00315314		hemE	0.0171714	0.00744528	0.0248244		hemE	0	0	0.0205226		hemE	0	0	0
MXAN_1616	0	0	0.0116168		MXAN_1616	0.0017121	0	0.00334933		MXAN_1616	0	0	0.0205226		MXAN_1616	0	0	0
MXAN_5563	0	0	0		MXAN_5563	0	0	0.00332118		MXAN_5563	0	0	0.0205226		MXAN_5563	0	0	0
MXAN_0855	0	0	0.0260549		MXAN_0855	0.0881733	0.104588	0.203071		MXAN_0855	0	0	0.0202453		MXAN_0855	0	0	0
MXAN_2377	0	0	0.0136083		MXAN_2377	0.0102726	0.0311993	0		MXAN_2377	0	0	0.0202453		MXAN_2377	0	0	0
MXAN_3721	0	0	0.00448078		MXAN_3721	0.00513631	0.0311993	0.00723343		MXAN_3721	0	0	0.0202453		MXAN_3721	0	0	0
fni	0	0	0.018587		fni	0.0254298	0.0301356	0.00405297		fni	0	0	0.0202453		fni	0	0	0
MXAN_2455	0	0	0.0371739		MXAN_2455	0.0242716	0.0262357	0.0288493		MXAN_2455	0	0	0.0202453		MXAN_2455	0	0	0
MXAN_2653	0	0	0.0476291		MXAN_2653	0.00730162	0.0223358	0.0245148		MXAN_2653	0	0	0.0202453		MXAN_2653	0	0	0
tonB(1)	0	0	0.0706968		tonB(1)	0.0017121	0.000354537	0.00413741		tonB(1)	0	0	0.0202453		tonB(1)	0	0	0
MXAN_1038	0	0	0.00730202		MXAN_1038	0.0284511	0	0.00636091		MXAN_1038	0	0	0.0202453		MXAN_1038	0	0	0
cheY(2)	0	0	0.00448078		cheY(2)	0.00513631	0	0.00104139		cheY(2)	0	0	0.0202453		cheY(2)	0	0	0
MXAN_0943	0	0	0.014604		MXAN_0943	0.00281993	0	0.00315231		MXAN_0943	0	0	0.0202453		MXAN_0943	0	0	0
MXAN_6215	0	0	0		MXAN_6215	0	0	0.00309602		MXAN_6215	0	0	0.0202453		MXAN_6215	0	0	0
MXAN_7104	0	0.116515	0.0051446		MXAN_7104	0.00614343	0.00389991	0.0239801		MXAN_7104	0.0417614	0.393701	0.0199679		MXAN_7104	0	0	0
ahcY	0	0	0.0348505		ahcY	0.0342421	0.0319083	0.0764154		ahcY	0.0556819	0	0.0199679		ahcY	0	0	0
vegA	0	0	0.0411568		vegA	0.0476367	0.0687802	0.0917548		vegA	0	0	0.0199679		vegA	0	0	0
MXAN_6084	0	0	0.0527737		MXAN_6084	0.0143011	0	0.121871		MXAN_6084	0.227368	0	0.0196906		MXAN_6084	0	0	0
MXAN_3291	0	0	0.0343527		MXAN_3291	0.00574058	0.0116997	0.0327052		MXAN_3291	0.125284	0	0.0196906		MXAN_3291	0	0	0
MXAN_6965	0	0	0.00896157		MXAN_6965	0.0760375	0.0928887	0.0173096		MXAN_6965	0	0	0.0196906		MXAN_6965	0	0	0
MXAN_0207	0	0	0.0677096		MXAN_0207	0.113301	0.0868616	0.0115116		MXAN_0207	0	0	0.0196906		MXAN_0207	0	0	0
MXAN_2962	0	0	0.0534375		MXAN_2962	0.0557441	0.0616894	0.0254718		MXAN_2962	0	0	0.0196906		MXAN_2962	0	0	0
MXAN_6351	0	0	0		MXAN_6351	0.00508595	0.0616894	0.00816223		MXAN_6351	0	0	0.0196906		MXAN_6351	0	0	0
MXAN_4966	0	0	0.0210763		MXAN_4966	0.0435076	0.029072	0.0709833		MXAN_4966	0	0	0.0196906		MXAN_4966	0	0	0
MXAN_2208	0	0	0.0403271		MXAN_2208	0.0321775	0.0219813	0.12598		MXAN_2208	0	0	0.0196906		MXAN_2208	0	0	0
MXAN_6227	0	0	0.0399952		MXAN_6227	0.01415	0.0216268	0.0250496		MXAN_6227	0	0	0.0196906		MXAN_6227	0	0	0
MXAN_2628	0	0	0.0174253		MXAN_2628	0	0.0138269	0.00123841		MXAN_2628	0	0	0.0196906		MXAN_2628	0	0	0
MXAN_5461	0	0	0.00099573		MXAN_5461	0.00115819	0.00709074	0.00104139		MXAN_5461	0	0	0.0196906		MXAN_5461	0	0	0
MXAN_1619	0	0	0.0252252		MXAN_1619	0.00453204	0	0.00166059		MXAN_1619	0	0	0.0196906		MXAN_1619	0	0	0
MXAN_3992	0	0	0.0380037		MXAN_3992	0.0145529	0.00602713	0.0280612		MXAN_3992	0.129924	0	0.0194133		MXAN_3992	0	0	0
ggt	0	0	0.0229018		ggt	0.0105244	0.00815435	0.0123559		ggt	0	0	0.0194133		ggt	0	0	0
MXAN_6223	0	0	0.0592459		MXAN_6223	0.00775482	0.00602713	0.0148327		MXAN_6223	0	0	0.0194133		MXAN_6223	0	0	0
hsfA	0	0	0.0298719		hsfA	0.0025178	0.00531806	0.0146639		hsfA	0	0	0.0194133		hsfA	0	0	0
MXAN_3726	0	0	0.0482929		MXAN_3726	0.0100208	0	0.00301158		MXAN_3726	0	0	0.0194133		MXAN_3726	0	0	0
MXAN_4551	0	0	0		MXAN_4551	0	0	0.00500992		MXAN_4551	0	0	0.0194133		MXAN_4551	0	0	0
MXAN_6660	0	0	0.0363441		MXAN_6660	0.0368606	0	0.100987		MXAN_6660	0	0	0.0191359		MXAN_6660	0	0	0
MXAN_0611	0	0	0.0187529		MXAN_0611	0	0	0.00399668		MXAN_0611	0	0	0.0191359		MXAN_0611	0	0	0
galE	0	0	0.02954		galE	0.100007	0.111679	0.0432035		galE	0	0	0.0188586		galE	0	0	0
rplY	0	0.41954	0.0018255		rplY	0.0761886	0	0.0855064		rplY	0	0	0.0188586		rplY	0	0	0
MXAN_5613	0	0	0.0982454		MXAN_5613	0.0681316	0	0.033043		MXAN_5613	0	0	0.0188586		MXAN_5613	0	0	0
MXAN_4468	0	0	0.0214082		MXAN_4468	0.0097187	0	0.0136225		MXAN_4468	0	0	0.0188586		MXAN_4468	0	0	0
MXAN_4387	0	0	0.0179231		MXAN_4387	0.00689877	0	0.0393194		MXAN_4387	0	0	0.0188586		MXAN_4387	0	0	0
tmk	0	0	0.0408249		tmk	0.00433061	0	0.00433443		tmk	0	0	0.0188586		tmk	0	0	0
MXAN_7108	0	0	0.0204125		MXAN_7108	0.00261851	0	0.00683939		MXAN_7108	0	0	0.0188586		MXAN_7108	0	0	0
MXAN_4081	0	0	0.0157657		MXAN_4081	0.0298611	0.0350992	0.00909104		MXAN_4081	0.106724	0	0.0185813		MXAN_4081	0	0	0
MXAN_2065	0	0	0.0439781		MXAN_2065	0.054032	0.0829617	0.00385595		MXAN_2065	0	0	0.0185813		MXAN_2065	0	0	0
MXAN_4910	0	0	0.0169274		MXAN_4910	0.0432054	0.0294266	0.022038		MXAN_4910	0	0	0.0185813		MXAN_4910	0	0	0
argE	0	0	0.0084637		argE	0.013294	0.0205631	0.00911919		argE	0	0	0.0185813		argE	0	0	0
MXAN_7333	0	0.298677	0.0106211		MXAN_7333	0.0684841	0.019145	0.164173		MXAN_7333	0	0	0.0185813		MXAN_7333	0	0	0
MXAN_7382	0	0	0.00896157		MXAN_7382	0.00785553	0.0159542	0.0203211		MXAN_7382	0	0	0.0185813		MXAN_7382	0	0	0
MXAN_6627	0	0	0.0214082		MXAN_6627	0.0104237	0.00531806	0.0176192		MXAN_6627	0	0	0.0185813		MXAN_6627	0	0	0
MXAN_2085	0	0	0.00763393		MXAN_2085	0.0378677	0	0.0153112		MXAN_2085	0	0	0.0185813		MXAN_2085	0	0	0
gatC	0	0	0.0152679		gatC	0.0170203	0	0.0224039		gatC	0	0	0.0185813		gatC	0	0	0
pgl	0	0	0.0127785		pgl	0.0149557	0	0.0104702		pgl	0	0	0.0185813		pgl	0	0	0
argH	0	0	0.00149359		argH	0.00639521	0	0.00509436		argH	0.060322	0.590551	0.0183039		argH	0	0	0
MXAN_5743	0	0	0.037008		MXAN_5743	0.0150061	0.028363	0.0308758		MXAN_5743	0.0417614	0.433071	0.0183039		MXAN_5743	0	0	0
MXAN_4332	0	0	0.0595778		MXAN_4332	0.0832888	0.253848	0.00726157		MXAN_4332	0	0	0.0183039		MXAN_4332	0	0	0
MXAN_0290	0	0	0.0179231		MXAN_0290	0.0753829	0.191805	0.152718		MXAN_0290	0	0	0.0183039		MXAN_0290	0	0	0
MXAN_7032	0	0	0.00531056		MXAN_7032	0.00770446	0.047508	0.00464403		MXAN_7032	0	0	0.0183039		MXAN_7032	0	0	0
MXAN_5749	0	0	0.00448078		MXAN_5749	0.0177253	0.0436081	0.0104702		MXAN_5749	0	0	0.0183039		MXAN_5749	0	0	0
MXAN_3851	0	0	0.0365101		MXAN_3851	0.0160132	0.0329719	0.00318046		MXAN_3851	0	0	0.0183039		MXAN_3851	0	0	0
MXAN_1454	0	0	0.0155998		MXAN_1454	0.00261851	0.0159542	0.014889		MXAN_1454	0	0	0.0183039		MXAN_1454	0	0	0
MXAN_1105	0	0	0		MXAN_1105	0.0166678	0	0.00546025		MXAN_1105	0	0	0.0183039		MXAN_1105	0	0	0
MXAN_4064	0	0	0.0197486		MXAN_4064	0.0106755	0	0.0398824		MXAN_4064	0	0	0.0183039		MXAN_4064	0	0	0
MXAN_6763	0	0	0.0149359		MXAN_6763	0.00830873	0	0.0109205		MXAN_6763	0	0	0.0183039		MXAN_6763	0	0	0
MXAN_1050	0	0	0.00746797		MXAN_1050	0	0	0.0127218		MXAN_1050	0	0	0.0183039		MXAN_1050	0	0	0
guaB	0	0	0.00647224		guaB	0.0184303	0.00531806	0.018745		guaB	0	0.551181	0.0180266		guaB	0	0	0
MXAN_2041	0	0	0.00680415		MXAN_2041	0.0306164	0.00567259	0.0470876		MXAN_2041	0.060322	0	0.0180266		MXAN_2041	0	0	0
asgB	0	0	0.0287102		asgB	0.0232141	0.0609804	0.0439916		asgB	0	0	0.0180266		asgB	0	0	0
MXAN_0094	0	0	0.0131104		MXAN_0094	0.0130422	0.0294266	0.0577548		MXAN_0094	0	0	0.0180266		MXAN_0094	0	0	0
MXAN_0627	0	0	0.0142721		MXAN_0627	0.00624414	0.0127633	0.00112583		MXAN_0627	0	0	0.0180266		MXAN_0627	0	0	0
mglA	0	0	0.022072		mglA	0.0179267	0	0.0425562		mglA	0	0	0.0180266		mglA	0	0	0
MXAN_4807	0	0	0.0170934		MXAN_4807	0.016416	0	0.0248807		MXAN_4807	0	0	0.0180266		MXAN_4807	0	0	0
MXAN_5422	0	0	0.00713606		MXAN_5422	0.0124379	0	0.0045033		MXAN_5422	0	0	0.0180266		MXAN_5422	0	0	0
MXAN_2562	0	0	0.00149359		MXAN_2562	0.0122869	0	0.0128626		MXAN_2562	0	0	0.0180266		MXAN_2562	0	0	0
MXAN_1689	0	0	0.199312		MXAN_1689	0	0	0.00616389		MXAN_1689	0	0	0.0180266		MXAN_1689	0	0	0
MXAN_7393	0	0	0.0280464		MXAN_7393	0	0	0.00551654		MXAN_7393	0	0	0.0180266		MXAN_7393	0	0	0
MXAN_4944	0	0	0.00414887		MXAN_4944	0	0	0		MXAN_4944	0	0	0.0180266		MXAN_4944	0	0	0
MXAN_0777	0	0	0.0169274		MXAN_0777	0.00327314	0	0.00123841		MXAN_0777	0.417614	0	0.0177493		MXAN_0777	0	0	0
MXAN_4808	0	0	0.0195827		MXAN_4808	0.0114812	0.0255267	0.0430628		MXAN_4808	0.0556819	0	0.0177493		MXAN_4808	0	0	0
MXAN_1313	0	0	0.0472972		MXAN_1313	0.0143011	0.0503443	0.00405297		MXAN_1313	0	0	0.0177493		MXAN_1313	0	0	0
MXAN_2977	0	0	0.0401611		MXAN_2977	0.0416947	0.0212722	0.00374337		MXAN_2977	0	0	0.0177493		MXAN_2977	0	0	0
MXAN_5338	0	0	0.00564247		MXAN_5338	0.016265	0.0198541	0.022798		MXAN_5338	0	0	0.0177493		MXAN_5338	0	0	0
MXAN_1442	0	0.169338	0.0219061		MXAN_1442	0.0142004	0.0163087	0.0361953		MXAN_1442	0	0	0.0177493		MXAN_1442	0	0	0
sufC	0	0	0.00448078		sufC	0.0243219	0.0106361	0.00247682		sufC	0	0	0.0177493		sufC	0	0	0
MXAN_5476	0	0	0.0131104		MXAN_5476	0.000402848	0.00248176	0.00180132		MXAN_5476	0	0	0.0177493		MXAN_5476	0	0	0
MXAN_0416	0	0	0.037008		MXAN_0416	0.0025178	0	0.0130314		MXAN_0416	0	0	0.0177493		MXAN_0416	0	0	0
MXAN_0726	0	0	0.00564247		MXAN_0726	0	0	0.00185761		MXAN_0726	0	0	0.0177493		MXAN_0726	0	0	0
MXAN_6998	0	0	0.0670458		MXAN_6998	0	0	0.000619204		MXAN_6998	0.208807	0	0.0174719		MXAN_6998	0	0	0
hemL	0	0	0.00896157		hemL	0.0239191	0.0354537	0.0395165		hemL	0	0	0.0174719		hemL	0	0	0
MXAN_3961	0	0.155208	0.0131104		MXAN_3961	0.0178764	0.0251721	0.00534767		MXAN_3961	0	0	0.0174719		MXAN_3961	0	0	0
pgsA	0	0	0.00630629		pgsA	0.00493488	0.0152451	0.00498178		pgsA	0	0	0.0174719		pgsA	0	0	0
MXAN_3953	0	0	0.0117828		MXAN_3953	0.000453204	0.00567259	0.00652979		MXAN_3953	0	0	0.0174719		MXAN_3953	0	0	0
MXAN_4298	0	0	0.00929348		MXAN_4298	0.00921514	0.00141815	0.0159586		MXAN_4298	0	0	0.0174719		MXAN_4298	0	0	0
MXAN_4368	0	0	0.0718585		MXAN_4368	0.0273936	0	0.0045033		MXAN_4368	0	0	0.0174719		MXAN_4368	0	0	0
MXAN_4552	0	0	0		MXAN_4552	0.00911443	0	0.0045033		MXAN_4552	0	0	0.0174719		MXAN_4552	0	0	0
MXAN_3746	0	0	0.00448078		MXAN_3746	0.00775482	0	0.0120745		MXAN_3746	0	0	0.0174719		MXAN_3746	0	0	0
nadB	0	0	0.00580842		nadB	0.00684841	0	0.00526323		nadB	0	0	0.0174719		nadB	0	0	0
MXAN_2803	0	0	0.0204125		MXAN_2803	0.00508595	0	0.00273013		MXAN_2803	0	0	0.0174719		MXAN_2803	0	0	0
MXAN_6154	0	0	0.00398292		MXAN_6154	0.00458239	0	0.00180132		MXAN_6154	0	0	0.0174719		MXAN_6154	0	0	0
MXAN_0841	0	0	0.0104552		MXAN_0841	0.000956763	0	0.000816223		MXAN_0841	0	0	0.0174719		MXAN_0841	0	0	0
MXAN_0877	0	0	0.00862966		MXAN_0877	0	0	0.00458774		MXAN_0877	0	0	0.0174719		MXAN_0877	0	0	0
MXAN_3644	0	0	0.535869		MXAN_3644	0	0	0.000534767		MXAN_3644	0	0	0.0174719		MXAN_3644	0	0	0
cdd	0	0	0.0117828		cdd	0.00901372	0.0276539	0.0213625		cdd	0	0	0.0171946		cdd	0	0	0
MXAN_4553	0	0	0.00547651		MXAN_4553	0.00941657	0	0.0207152		MXAN_4553	0	0	0.0171946		MXAN_4553	0	0	0
MXAN_3798	0	0	0.00348505		MXAN_3798	0.00397812	0	0.0111738		MXAN_3798	0	0	0.0171946		MXAN_3798	0	0	0
MXAN_1729	0	0	0.0570885		MXAN_1729	0	0	0		MXAN_1729	0	0	0.0171946		MXAN_1729	0	0	0
MXAN_3331	0	0	0.0248932		MXAN_3331	0.00961799	0.0592077	0.00751488		MXAN_3331	0.157765	0	0.0169173		MXAN_3331	0	0	0
purF	0	0	0.00497865		purF	0.0213006	0.0421899	0.00531952		purF	0.0556819	0	0.0169173		purF	0	0	0
MXAN_3989	0	0	0.00614033		MXAN_3989	0.00478382	0.0294266	0.0048129		MXAN_3989	0	0	0.0169173		MXAN_3989	0	0	0
MXAN_4391	0	0	0.0084637		MXAN_4391	0.0124883	0.0230449	0.0136225		MXAN_4391	0	0	0.0169173		MXAN_4391	0	0	0
ftsA	0	0	0.014604		ftsA	0.0263865	0.0187905	0.0313261		ftsA	0	0	0.0169173		ftsA	0	0	0
deoD	0	0	0.0066382		deoD	0.00976906	0	0.0348724		deoD	0	0	0.0169173		deoD	0	0	0
greA	0	0	0.0318634		greA	0.107157	0.0375809	0.0282019		greA	0	0	0.01664		greA	0	0	0
MXAN_5530	0	0	0.0482929		MXAN_5530	0.0271922	0.0358082	0.012947		MXAN_5530	0	0	0.01664		MXAN_5530	0	0	0
MXAN_2959	0	0	0.0124466		MXAN_2959	0.00508595	0.0198541	0.00571356		MXAN_2959	0	0	0.01664		MXAN_2959	0	0	0
MXAN_0554	0	0	0.0313655		MXAN_0554	0.0197395	0.00886343	0.00774005		MXAN_0554	0	0	0.01664		MXAN_0554	0	0	0
MXAN_1082	0	0	0.0175912		MXAN_1082	0.00745268	0.0067362	0.0779071		MXAN_1082	0	0	0.01664		MXAN_1082	0	0	0
MXAN_2729	0	0	0.0136083		MXAN_2729	0.0300122	0.00602713	0.0714899		MXAN_2729	0	0	0.01664		MXAN_2729	0	0	0
MXAN_0732	0	0	0.00763393		MXAN_0732	0.0131933	0	0.0329022		MXAN_0732	0	0	0.01664		MXAN_0732	0	0	0
MXAN_0734	0	0	0.0346846		MXAN_0734	0.0121358	0	0.017394		MXAN_0734	0	0	0.01664		MXAN_0734	0	0	0
MXAN_3062	0	0	0.0214082		MXAN_3062	0.0092655	0	0.0197582		MXAN_3062	0	0	0.01664		MXAN_3062	0	0	0
MXAN_3024	0	0	0.0102892		MXAN_3024	0.00715055	0	0.0100198		MXAN_3024	0	0	0.01664		MXAN_3024	0	0	0
MXAN_1135	0	0	0.00531056		MXAN_1135	0	0	0.00698012		MXAN_1135	0	0	0.01664		MXAN_1135	0	0	0
MXAN_3927	0	0	0.00265528		MXAN_3927	0	0	0.00402483		MXAN_3927	0	0	0.01664		MXAN_3927	0	0	0
rpoD	0	0	0.0141062		rpoD	0.0441622	0.0411263	0.0257533		rpoD	0	0.354331	0.0163626		rpoD	0	0	0
MXAN_1147	0	0	0.011119		MXAN_1147	0.022207	0.0425444	0.00754303		MXAN_1147	0	0	0.0163626		MXAN_1147	0	0	0
MXAN_1427	0	0	0.0947603		MXAN_1427	0.0305157	0.014536	0.0854501		MXAN_1427	0	0	0.0163626		MXAN_1427	0	0	0
rho(2)	0	0	0.04431		rho(2)	0.0310193	0.0131179	0.0106953		rho(2)	0	0	0.0163626		rho(2)	0	0	0
MXAN_6579	0	0	0.010953		MXAN_6579	0.00704984	0.00744528	0.00554469		MXAN_6579	0	0	0.0163626		MXAN_6579	0	0	0
MXAN_2433	0	0	0.0136083		MXAN_2433	0.00765411	0	0.00658608		MXAN_2433	0	0	0.0163626		MXAN_2433	0	0	0
MXAN_5792	0	0	0.0481269		MXAN_5792	0.0382202	0	0.0191109		MXAN_5792	0	2.51969	0.0160853		MXAN_5792	0	0	0
MXAN_0840	0	0	0.0066382		MXAN_0840	0	0	0.00101324		MXAN_0840	0.0649622	0	0.0160853		MXAN_0840	0	0	0
MXAN_3081	0	0	0.00813179		MXAN_3081	0.0112797	0.0116997	0.00303973		MXAN_3081	0	0	0.0160853		MXAN_3081	0	0	0
argC	0	0.229551	0.00298719		argC	0.00241709	0.00744528	0.0107516		argC	0	0	0.0160853		argC	0	0	0
MXAN_3747	0	0	0.0119488		MXAN_3747	0.0107258	0.0067362	0.013341		MXAN_3747	0	0	0.0160853		MXAN_3747	0	0	0
MXAN_7086	0	0	0.0536035		MXAN_7086	0.00750304	0	0.0128907		MXAN_7086	0	0	0.0160853		MXAN_7086	0	0	0
MXAN_7477	0	0	0.0255571		MXAN_7477	0.0062945	0	0.00757118		MXAN_7477	0	0	0.0160853		MXAN_7477	0	0	0
MXAN_4988	0	0	0.00132764		MXAN_4988	0	0	0.000506621		MXAN_4988	0	0	0.0160853		MXAN_4988	0	0	0
acsA(1)	0	0	0.0253911		acsA(1)	0.0233148	0.0368718	0.0195331		acsA(1)	0.0417614	0	0.015808		acsA(1)	0	0	0
gyrA	0	0	0.0230677		gyrA	0.0231637	0.0404172	0.0206026		gyrA	0	0	0.015808		gyrA	0	0	0
MXAN_6986	0	0	0.0252252		MXAN_6986	0.0165671	0.0163087	0.0145231		MXAN_6986	0	0	0.015808		MXAN_6986	0	0	0
pfkA(2)	0	0	0.0280464		pfkA(2)	0.0046831	0.00744528	0.00804965		pfkA(2)	0	0	0.015808		pfkA(2)	0	0	0
MXAN_5849	0	0	0.0170934		MXAN_5849	0.0123372	0	0.0054884		MXAN_5849	0	0	0.015808		MXAN_5849	0	0	0
hpt	0	0	0.0101233		hpt	0.00881229	0	0.0296655		hpt	0	0	0.015808		hpt	0	0	0
MXAN_4974	0	0	0.00481269		MXAN_4974	0.00740233	0	0.00365893		MXAN_4974	0	0	0.015808		MXAN_4974	0	0	0
MXAN_4344	0	0	0.0172593		MXAN_4344	0.00735197	0	0.00723343		MXAN_4344	0	0	0.015808		MXAN_4344	0	0	0
MXAN_2302	0	0	0.00381696		MXAN_2302	0	0	0.00287085		MXAN_2302	0	0	0.015808		MXAN_2302	0	0	0
fpr	0	0	0		fpr	0	0	0.00233609		fpr	0	0	0.015808		fpr	0	0	0
MXAN_0286	0	0	0.0336889		MXAN_0286	0.0143011	0.0163087	0.0107235		MXAN_0286	0	0	0.0155306		MXAN_0286	0	0	0
MXAN_5803	0	0	0.0114509		MXAN_5803	0	0.0134724	0.00565727		MXAN_5803	0	0	0.0155306		MXAN_5803	0	0	0
ftsZ	0	0	0.0131104		ftsZ	0.0195381	0.0127633	0.0437946		ftsZ	0	0	0.0155306		ftsZ	0	0	0
MXAN_5296	0	0	0.00779988		MXAN_5296	0.00347456	0.00709074	0.00182947		MXAN_5296	0	0	0.0155306		MXAN_5296	0	0	0
gspG(1)	0	0	0.00730202		gspG(1)	0.0166175	0	0.0429221		gspG(1)	0	0	0.0155306		gspG(1)	0	0	0
MXAN_3921	0	0	0.0066382		MXAN_3921	0.0147543	0	0.0126092		MXAN_3921	0	0	0.0155306		MXAN_3921	0	0	0
MXAN_6910	0	0	0.0272166		MXAN_6910	0.0143515	0	0.00374337		MXAN_6910	0	0	0.0155306		MXAN_6910	0	0	0
MXAN_2659	0	0.301503	0.0121147		MXAN_2659	0.013445	0	0.0870826		MXAN_2659	0	0	0.0155306		MXAN_2659	0	0	0
MXAN_3645	0	0	0.142555		MXAN_3645	0	0	0.000112583		MXAN_3645	0	0	0.0155306		MXAN_3645	0	0	0
MXAN_0008	0	0	0		MXAN_0008	0	0	0		MXAN_0008	0	0	0.0155306		MXAN_0008	0	0	0
MXAN_6602	0	0	0.0018255		MXAN_6602	0.0286525	0.0272993	0.00602317		MXAN_6602	0.143845	0	0.0152533		MXAN_6602	0	0	0
MXAN_2677	0	0	0.0102892		MXAN_2677	0.00151068	0	0.0114271		MXAN_2677	0.0974433	0	0.0152533		MXAN_2677	0	0	0
MXAN_6337	0	0.493883	0.0154338		MXAN_6337	0.0399826	0.00779981	0.114722		MXAN_6337	0.0835228	0	0.0152533		MXAN_6337	0	0	0
MXAN_1962	0	0	0.00647224		MXAN_1962	0.00725126	0.0439626	0.0123278		MXAN_1962	0	0	0.0152533		MXAN_1962	0	0	0
hemB	0	0	0.00979134		hemB	0.0128408	0.0159542	0.0536456		hemB	0	0	0.0152533		hemB	0	0	0
MXAN_7311	0	0	0.00979134		MXAN_7311	0.00574058	0.00886343	0.0195331		MXAN_7311	0	0	0.0152533		MXAN_7311	0	0	0
MXAN_3190	0	0	0.0107871		MXAN_3190	0.0125386	0	0.00672681		MXAN_3190	0	0	0.0152533		MXAN_3190	0	0	0
MXAN_1759	0	0	0.00448078		MXAN_1759	0	0	0.00064735		MXAN_1759	0	0	0.0152533		MXAN_1759	0	0	0
MXAN_4301	0	0	0.0159317		MXAN_4301	0.0107258	0	0.0183791		MXAN_4301	0.0696023	0	0.014976		MXAN_4301	0	0	0
gspF	0	0.189554	0.0033191		gspF	0.002971	0	0.00413741		gspF	0.0649622	0	0.014976		gspF	0	0	0
ohr	0	0	0.0104552		ohr	0.0396805	0.0485716	0.00692383		ohr	0	0	0.014976		ohr	0	0	0
MXAN_0477	0	0	0		MXAN_0477	0	0.0485716	0.00306787		MXAN_0477	0	0	0.014976		MXAN_0477	0	0	0
MXAN_1510	0	0	0.0240635		MXAN_1510	0.00861087	0.0265903	0.0148609		MXAN_1510	0	0	0.014976		MXAN_1510	0	0	0
glyA	0	0	0.0320293		glyA	0.0188331	0.0184359	0.0489171		glyA	0	0	0.014976		glyA	0	0	0
MXAN_1058	0	0	0.00730202		MXAN_1058	0.00840945	0.0173723	0.00312417		MXAN_1058	0	0	0.014976		MXAN_1058	0	0	0
tkt	0	0	0.0154338		tkt	0.0182289	0.00709074	0.0596406		tkt	0	0	0.014976		tkt	0	0	0
MXAN_6083	0	0	0.0290421		MXAN_6083	0.0150564	0	0.191306		MXAN_6083	0	0	0.014976		MXAN_6083	0	0	0
MXAN_2679	0	0	0.00597438		MXAN_2679	0.0105748	0	0.00503807		MXAN_2679	0	0	0.014976		MXAN_2679	0	0	0
MXAN_3959	0	0	0.0018255		MXAN_3959	0.00649592	0	0.00512251		MXAN_3959	0	0	0.014976		MXAN_3959	0	0	0
MXAN_1692	0	0	0.00697011		MXAN_1692	0.00402848	0	0.0132566		MXAN_1692	0	0	0.014976		MXAN_1692	0	0	0
MXAN_1338	0	0	0		MXAN_1338	0.00397812	0	0.0277234		MXAN_1338	0	0	0.014976		MXAN_1338	0	0	0
MXAN_3646	0	0	0.165457		MXAN_3646	0.00100712	0	0		MXAN_3646	0	0	0.014976		MXAN_3646	0	0	0
MXAN_5486	0	0	0.00431483		MXAN_5486	0	0	0.00247682		MXAN_5486	0	0	0.014976		MXAN_5486	0	0	0
acdA	0	0	0.044144		acdA	0.011028	0.0411263	0.035745		acdA	0	0	0.0146986		acdA	0	0	0
MXAN_0317	0	0.330415	0.0735181		MXAN_0317	0.0343931	0.0319083	0.211683		MXAN_0317	0	0	0.0146986		MXAN_0317	0	0	0
MXAN_0818	0	0	0.0018255		MXAN_0818	0.00891301	0.0258812	0.0175629		MXAN_0818	0	0	0.0146986		MXAN_0818	0	0	0
MXAN_6436	0	0	0.0127785		MXAN_6436	0.0212502	0.0131179	0.00194205		MXAN_6436	0	0	0.0146986		MXAN_6436	0	0	0
MXAN_1472	0	0	0.00365101		MXAN_1472	0.0042299	0.0131179	0.00537582		MXAN_1472	0	0	0.0146986		MXAN_1472	0	0	0
MXAN_3986	0	0	0.0144381		MXAN_3986	0.00161139	0.00496352	0.000562913		MXAN_3986	0	0	0.0146986		MXAN_3986	0	0	0
ribA	0	0	0.010953		ribA	0.0361052	0	0.0142698		ribA	0	0	0.0146986		ribA	0	0	0
MXAN_2444	0	0	0.018587		MXAN_2444	0.0160132	0	0.0116241		MXAN_2444	0	0	0.0146986		MXAN_2444	0	0	0
MXAN_2958	0	0	0.0190848		MXAN_2958	0.0154089	0	0.00427814		MXAN_2958	0	0	0.0146986		MXAN_2958	0	0	0
MXAN_2660	0	0	0.0202465		MXAN_2660	0.00901372	0	0.0476224		MXAN_2660	0	0	0.0146986		MXAN_2660	0	0	0
MXAN_3198	0	0	0.00232337		MXAN_3198	0.00553916	0	0.00205463		MXAN_3198	0	0	0.0146986		MXAN_3198	0	0	0
MXAN_5734	0	0	0.0165955		MXAN_5734	0.0054888	0	0.0101606		MXAN_5734	0	0	0.0146986		MXAN_5734	0	0	0
pdcA	0	0	0.0248932		pdcA	0.00292065	0	0.00334933		pdcA	0	0	0.0146986		pdcA	0	0	0
cysC	0	0	0.00713606		cysC	0.00276958	0	0.00461588		cysC	0	0	0.0146986		cysC	0	0	0
MXAN_0676	0	0	0		MXAN_0676	0	0	0.00405297		MXAN_0676	0	0	0.0146986		MXAN_0676	0	0	0
MXAN_1931	0	0	0		MXAN_1931	0.0208977	0	0.056038		MXAN_1931	0.426894	0	0.0144213		MXAN_1931	0	0	0
MXAN_3699	0	0	0.00614033		MXAN_3699	0.0139486	0	0.0280049		MXAN_3699	0.426894	0	0.0144213		MXAN_3699	0	0	0
fruA	0	0	0.0371739		fruA	0.0330335	0.127279	0.00261754		fruA	0.134565	0	0.0144213		fruA	0	0	0
MXAN_2417	0	0	0.0230677		MXAN_2417	0.0108769	0.0155996	0.0108361		MXAN_2417	0.0278409	0	0.0144213		MXAN_2417	0	0	0
MXAN_4868	0	0	0.0169274		MXAN_4868	0.0970863	0.0712619	0.0938938		MXAN_4868	0	0	0.0144213		MXAN_4868	0	0	0
MXAN_0315	0	0	0.0142721		MXAN_0315	0.03112	0.0255267	0.0361108		MXAN_0315	0	0	0.0144213		MXAN_0315	0	0	0
MXAN_5739	0	0	0.0117828		MXAN_5739	0	0.0166632	0.00757118		MXAN_5739	0	0	0.0144213		MXAN_5739	0	0	0
MXAN_0115	0	0	0.0245613		MXAN_0115	0.0084598	0	0.0168874		MXAN_0115	0	0	0.0144213		MXAN_0115	0	0	0
trmU	0	0	0.00215741		trmU	0.00493488	0	0.00410926		trmU	0	0	0.0144213		trmU	0	0	0
MXAN_2293	0	0	0.00282123		MXAN_2293	0.00166175	0	0.0045033		MXAN_2293	0	0	0.0144213		MXAN_2293	0	0	0
MXAN_3386	0	0	0.0144381		MXAN_3386	0.0527731	0.0783527	0.0367019		MXAN_3386	0.139205	0	0.014144		MXAN_3386	0	0	0
fabD(2)	0	0	0.0190848		fabD(2)	0.0250773	0.00850889	0.0202086		fabD(2)	0.0928031	0	0.014144		fabD(2)	0	0	0
MXAN_5793	0	0	0.0126126		MXAN_5793	0.0105748	0	0.0186887		MXAN_5793	0.0696023	0	0.014144		MXAN_5793	0	0	0
dofB	0	0	0.0363441		dofB	0.026588	0.0698438	0.0704204		dofB	0	0	0.014144		dofB	0	0	0
gcvT(1)	0	0	0.0162636		gcvT(1)	0.0310696	0.0592077	0.0111175		gcvT(1)	0	0	0.014144		gcvT(1)	0	0	0
MXAN_2536	0	0.124992	0.0356803		MXAN_2536	0.0341413	0.028363	0.0722498		MXAN_2536	0	0	0.014144		MXAN_2536	0	0	0
MXAN_5300	0	0	0.00165955		MXAN_5300	0.0121861	0.0124088	0.0168874		MXAN_5300	0	0	0.014144		MXAN_5300	0	0	0
pdp	0	0	0.0112849		pdp	0.0228113	0.0116997	0.0132284		pdp	0	0	0.014144		pdp	0	0	0
MXAN_4607	0	0	0		MXAN_4607	0	0	0.000731786		MXAN_4607	0	0	0.014144		MXAN_4607	0	0	0
MXAN_5715	0	0	0.00630629		MXAN_5715	0.0146536	0.0131179	0.00492549		MXAN_5715	0.0696023	0	0.0138666		MXAN_5715	0	0	0
MXAN_2423	0	0	0.0149359		MXAN_2423	0.00332349	0.0155996	0.0186324		MXAN_2423	0.0556819	0	0.0138666		MXAN_2423	0	0	0
typA	0	0	0.0033191		typA	0.01415	0.0198541	0.0144106		typA	0.0417614	0	0.0138666		typA	0	0	0
clpS	0	0	0		clpS	0.00669734	0.0407718	0.00565727		clpS	0	0	0.0138666		clpS	0	0	0
MXAN_4044	0	0	0		MXAN_4044	0.0112797	0.0230449	0.008697		MXAN_4044	0	0	0.0138666		MXAN_4044	0	0	0
MXAN_0479	0	0	0.0124466		MXAN_0479	0.0162146	0.0198541	0.00230794		MXAN_0479	0	0	0.0138666		MXAN_0479	0	0	0
MXAN_3488	0	0	0.01477		MXAN_3488	0.00302136	0.00460898	0.0663674		MXAN_3488	0	0	0.0138666		MXAN_3488	0	0	0
MXAN_2509	0	0	0.0033191		MXAN_2509	0.00745268	0	0.00858442		MXAN_2509	0	0	0.0138666		MXAN_2509	0	0	0
MXAN_5029	0	0	0.0550971		MXAN_5029	0.00745268	0	0.00143543		MXAN_5029	0	0	0.0138666		MXAN_5029	0	0	0
MXAN_6105	0	0	0.00564247		MXAN_6105	0.00327314	0	0.00261754		MXAN_6105	0	0	0.0138666		MXAN_6105	0	0	0
MXAN_1924	0	0	0.00680415		MXAN_1924	0	0	0.00472847		MXAN_1924	0	0	0.0138666		MXAN_1924	0	0	0
MXAN_7300	0	0	0.0491227		MXAN_7300	0	0	0.00329304		MXAN_7300	0	0	0.0138666		MXAN_7300	0	0	0
MXAN_3222	0	0	0.0033191		MXAN_3222	0	0	0.00143543		MXAN_3222	0	0	0.0138666		MXAN_3222	0	0	0
hemS	0	0	0.162636		hemS	0	0	0.000422185		hemS	0	0	0.0138666		hemS	0	0	0
ccmC	0	0	0.0202465		ccmC	0.0217034	0.0120543	0.0374337		ccmC	0.129924	0	0.0135893		ccmC	0	0	0
MXAN_7501	0	0	0		MXAN_7501	0.0131933	0.0400627	0.00275827		MXAN_7501	0	0	0.0135893		MXAN_7501	0	0	0
MXAN_2749	0	0	0.0411568		MXAN_2749	0	0.0223358	0.000703641		MXAN_2749	0	0	0.0135893		MXAN_2749	0	0	0
socA3	0	0	0		socA3	0	0.0159542	0.000478476		socA3	0	0	0.0135893		socA3	0	0	0
MXAN_5573	0	0	0.0212422		MXAN_5573	0.00604272	0.014536	0.00546025		MXAN_5573	0	0	0.0135893		MXAN_5573	0	0	0
MXAN_1178	0	0	0.0129445		MXAN_1178	0.0121861	0.0124088	0.0182102		MXAN_1178	0	0	0.0135893		MXAN_1178	0	0	0
MXAN_0602	0	0	0.00464674		MXAN_0602	0.00805695	0	0.0101887		MXAN_0602	0	0	0.0135893		MXAN_0602	0	0	0
MXAN_1748	0	0	0.00315314		MXAN_1748	0.00735197	0	0.00565727		MXAN_1748	0	0	0.0135893		MXAN_1748	0	0	0
MXAN_6340	0	0	0		MXAN_6340	0.00659663	0	0.00692383		MXAN_6340	0	0	0.0135893		MXAN_6340	0	0	0
psd	0	0	0.0204125		psd	0.00639521	0	0.0210529		psd	0	0	0.0135893		psd	0	0	0
MXAN_1742	0	0	0		MXAN_1742	0.00478382	0	0.0413741		MXAN_1742	0	0	0.0135893		MXAN_1742	0	0	0
glyQ	0	0	0.00448078		glyQ	0.0170203	0.0163087	0.00737416		glyQ	0	0.826772	0.013312		glyQ	0	0	0
accD	0	0	0.00531056		accD	0.0204949	0	0.00925991		accD	0.102083	0	0.013312		accD	0	0	0
MXAN_0770	0	0	0.00896157		MXAN_0770	0.0529241	0.0900524	0.0168029		MXAN_0770	0	0	0.013312		MXAN_0770	0	0	0
MXAN_5745	0	0	0.00796584		MXAN_5745	0.0436083	0.086507	0.00360264		MXAN_5745	0	0	0.013312		MXAN_5745	0	0	0
dedA	0	0.182163	0.0084637		dedA	0.034947	0.0592077	0.0217284		dedA	0	0	0.013312		dedA	0	0	0
MXAN_2082	0	0	0.0195827		MXAN_2082	0.0153082	0.0354537	0.0130877		MXAN_2082	0	0	0.013312		MXAN_2082	0	0	0
MXAN_2005	0	0	0.00431483		MXAN_2005	0.0025178	0.0311993	0.0041937		MXAN_2005	0	0	0.013312		MXAN_2005	0	0	0
MXAN_5340	0	0	0.00680415		MXAN_5340	0.0131933	0.0180814	0.00506621		MXAN_5340	0	0	0.013312		MXAN_5340	0	0	0
MXAN_5506	0	0	0.00215741		MXAN_5506	0	0.0155996	0.000928806		MXAN_5506	0	0	0.013312		MXAN_5506	0	0	0
MXAN_0735	0	0	0.0487908		MXAN_0735	0.0012589	0.0116997	0.00323675		MXAN_0735	0	0	0.013312		MXAN_0735	0	0	0
dapF	0	0	0.00265528		dapF	0.00790589	0.0095725	0.00197019		dapF	0	0	0.013312		dapF	0	0	0
MXAN_2713	0	0	0.00779988		MXAN_2713	0.00130926	0.00815435	0.00371522		MXAN_2713	0	0	0.013312		MXAN_2713	0	0	0
MXAN_4217	0	0.190641	0.0305357		MXAN_4217	0.0279476	0.00602713	0.0245148		MXAN_4217	0	0	0.013312		MXAN_4217	0	0	0
MXAN_3679	0	0	0.0129445		MXAN_3679	0.0351485	0	0.00692383		MXAN_3679	0	0	0.013312		MXAN_3679	0	0	0
MXAN_6082	0	0	0.0238975		MXAN_6082	0.0277965	0	0.130342		MXAN_6082	0	0	0.013312		MXAN_6082	0	0	0
MXAN_1239	0	0	0.00315314		MXAN_1239	0.0180778	0	0.00830296		MXAN_1239	0	0	0.013312		MXAN_1239	0	0	0
MXAN_1303	0	0	0.0157657		MXAN_1303	0.0072009	0	0.00484105		MXAN_1303	0	0	0.013312		MXAN_1303	0	0	0
MXAN_5695	0	0	0.00580842		MXAN_5695	0.00679806	0	0.0189983		MXAN_5695	0	0	0.013312		MXAN_5695	0	0	0
MXAN_0192	0	0	0		MXAN_0192	0.00649592	0	0		MXAN_0192	0	0	0.013312		MXAN_0192	0	0	0
MXAN_0241	0	0	0		MXAN_0241	0.00649592	0	0		MXAN_0241	0	0	0.013312		MXAN_0241	0	0	0
trx(3)	0	0	0.00580842		trx(3)	0.00649592	0	0		trx(3)	0	0	0.013312		trx(3)	0	0	0
MXAN_2753	0	0	0.00580842		MXAN_2753	0	0	0.00813409		MXAN_2753	0	0	0.013312		MXAN_2753	0	0	0
MXAN_5100	0	0	0.00265528		MXAN_5100	0	0	0.00137914		MXAN_5100	0	0	0.013312		MXAN_5100	0	0	0
MXAN_1412	0	0	0.0385016		MXAN_1412	0.0449175	0.0921796	0.00942879		MXAN_1412	0	0	0.0130346		MXAN_1412	0	0	0
MXAN_5684	0	0	0.0210763		MXAN_5684	0.0317243	0.0900524	0.034985		MXAN_5684	0	0	0.0130346		MXAN_5684	0	0	0
MXAN_3782	0	0	0.018421		MXAN_3782	0.00352492	0.0216268	0.00135099		MXAN_3782	0	0	0.0130346		MXAN_3782	0	0	0
MXAN_3797	0	0	0.0225699		MXAN_3797	0.0232645	0.0205631	0.0376026		MXAN_3797	0	0	0.0130346		MXAN_3797	0	0	0
def(3)	0	0	0.00414887		def(3)	0	0.0152451	0.00315231		def(3)	0	0	0.0130346		def(3)	0	0	0
MXAN_2497	0	0	0.0275485		MXAN_2497	0.0037767	0.0116997	0.00509436		MXAN_2497	0	0	0.0130346		MXAN_2497	0	0	0
metF	0	0.29346	0.0131104		metF	0.00614343	0.0095725	0.00788078		metF	0	0	0.0130346		metF	0	0	0
MXAN_5581	0	0	0.00531056		MXAN_5581	0.00342421	0.00709074	0.00942879		MXAN_5581	0	0	0.0130346		MXAN_5581	0	0	0
MXAN_3759	0	0	0.0139402		MXAN_3759	0.0228113	0	0.04098		MXAN_3759	0	0	0.0130346		MXAN_3759	0	0	0
MXAN_4893	0	0	0.01477		MXAN_4893	0.0196388	0	0.00588244		MXAN_4893	0	0	0.0130346		MXAN_4893	0	0	0
MXAN_4774	0	0	0.0084637		MXAN_4774	0.0123876	0	0.0022798		MXAN_4774	0	0	0.0130346		MXAN_4774	0	0	0
MXAN_4400	0	0	0.00414887		MXAN_4400	0.00246744	0	0.00543211		MXAN_4400	0	0	0.0130346		MXAN_4400	0	0	0
mutM	0	0	0.00265528		mutM	0	0	0.0019139		mutM	0	0	0.0130346		mutM	0	0	0
MXAN_2232	0	0	0.0471312		MXAN_2232	0.0239191	0.062044	0.0041937		MXAN_2232	0.167046	0	0.0127573		MXAN_2232	0	0	0
MXAN_0206	0	0	0.0195827		MXAN_0206	0.0454714	0.0425444	0.00624833		MXAN_0206	0.0556819	0	0.0127573		MXAN_0206	0	0	0
MXAN_1112	0	0	0.00414887		MXAN_1112	0.00961799	0.0443171	0.00661422		MXAN_1112	0	0	0.0127573		MXAN_1112	0	0	0
pyrH	0	0	0.00945943		pyrH	0.0295086	0.0340356	0.0112583		pyrH	0	0	0.0127573		pyrH	0	0	0
MXAN_1917	0	0	0.014604		MXAN_1917	0.0097187	0.0297811	0.00489734		MXAN_1917	0	0	0.0127573		MXAN_1917	0	0	0
MXAN_3054	0	0	0.00912752		MXAN_3054	0.0138982	0.0212722	0.00993541		MXAN_3054	0	0	0.0127573		MXAN_3054	0	0	0
gnd	0	0	0.018255		gnd	0.022358	0.0159542	0.018942		gnd	0	0	0.0127573		gnd	0	0	0
MXAN_4174	0	0	0.00481269		MXAN_4174	0.0184303	0.0113452	0.00861256		MXAN_4174	0	0	0.0127573		MXAN_4174	0	0	0
rumA	0	0	0.0033191		rumA	0.000956763	0.00602713	0.00149172		rumA	0	0	0.0127573		rumA	0	0	0
MXAN_1087	0	0	0.0285443		MXAN_1087	0.0111287	0	0.00833111		MXAN_1087	0	0	0.0127573		MXAN_1087	0	0	0
MXAN_5527	0	0	0.00298719		MXAN_5527	0.00689877	0	0.0268791		MXAN_5527	0	0	0.0127573		MXAN_5527	0	0	0
MXAN_1652	0	0	0		MXAN_1652	0	0	0.00982283		MXAN_1652	0	0	0.0127573		MXAN_1652	0	0	0
MXAN_5190	0	0	0.0237316		MXAN_5190	0.0954246	0.0418354	0.0025894		MXAN_5190	0	0	0.01248		MXAN_5190	0	0	0
MXAN_0626	0	0	0.0107871		MXAN_0626	0.013445	0.0102816	0.00495363		MXAN_0626	0	0	0.01248		MXAN_0626	0	0	0
MXAN_3564	0	0.0397802	0.0315314		MXAN_3564	0.0273936	0.00921796	0.0720247		MXAN_3564	0	0	0.01248		MXAN_3564	0	0	0
MXAN_2060	0	0	0.010953		MXAN_2060	0.0184806	0	0.00382781		MXAN_2060	0	0	0.01248		MXAN_2060	0	0	0
MXAN_6673	0	0	0.00614033		MXAN_6673	0.0165168	0	0.0575297		MXAN_6673	0	0	0.01248		MXAN_6673	0	0	0
MXAN_6226	0	0	0.103556		MXAN_6226	0.0102223	0	0.0914452		MXAN_6226	0	0	0.01248		MXAN_6226	0	0	0
MXAN_1445	0	0	0.018255		MXAN_1445	0.00710019	0	0.00993541		MXAN_1445	0	0	0.01248		MXAN_1445	0	0	0
MXAN_3983	0	0	0.0562587		MXAN_3983	0.00679806	0	0.00323675		MXAN_3983	0	0	0.01248		MXAN_3983	0	0	0
MXAN_3336	0	0	0.0117828		MXAN_3336	0.0067477	0	0.0109205		MXAN_3336	0	0	0.01248		MXAN_3336	0	0	0
MXAN_0753	0	0	0.00398292		MXAN_0753	0.00236673	0	0.00343377		MXAN_0753	0	0	0.01248		MXAN_0753	0	0	0
MXAN_0039	0	0	0.0204125		MXAN_0039	0.00236673	0	0.00216721		MXAN_0039	0	0	0.01248		MXAN_0039	0	0	0
MXAN_4811	0	0	0.00862966		MXAN_4811	0.00135961	0	0.00199834		MXAN_4811	0	0	0.01248		MXAN_4811	0	0	0
MXAN_3820	0	0	0		MXAN_3820	0	0	0.00151986		MXAN_3820	0	0	0.01248		MXAN_3820	0	0	0
MXAN_4372	0	0	0.0545992		MXAN_4372	0	0	0.00126655		MXAN_4372	0	0	0.01248		MXAN_4372	0	0	0
MXAN_2571	0	0	0.0107871		MXAN_2571	0.00181281	0	0.00109768		MXAN_2571	0	0.590551	0.0122026		MXAN_2571	0	0	0
MXAN_1981	0	0	0.00697011		MXAN_1981	0.0350478	0.0655893	0.00509436		MXAN_1981	0	0	0.0122026		MXAN_1981	0	0	0
MXAN_2954	0	0	0		MXAN_2954	0.00604272	0.0368718	0.00126655		MXAN_2954	0	0	0.0122026		MXAN_2954	0	0	0
MXAN_4153	0	0	0.00796584		MXAN_4153	0.00921514	0.028363	0.0121871		MXAN_4153	0	0	0.0122026		MXAN_4153	0	0	0
menA	0	0	0.00248932		menA	0.00287029	0.0265903	0.00278642		menA	0	0	0.0122026		menA	0	0	0
MXAN_4329	0	0.443886	0.0237316		MXAN_4329	0.00231637	0.0141815	0.0315231		MXAN_4329	0	0	0.0122026		MXAN_4329	0	0	0
MXAN_1297	0	0	0.0345186		MXAN_1297	0.0101215	0.00886343	0.00768376		MXAN_1297	0	0	0.0122026		MXAN_1297	0	0	0
MXAN_5360	0	0	0.00580842		MXAN_5360	0.00810731	0.00850889	0.0250496		MXAN_5360	0	0	0.0122026		MXAN_5360	0	0	0
MXAN_2926	0	0	0.0214082		MXAN_2926	0.0181785	0	0.0213344		MXAN_2926	0	0	0.0122026		MXAN_2926	0	0	0
MXAN_5199	0	0	0.00481269		MXAN_5199	0.0142507	0	0.0116241		MXAN_5199	0	0	0.0122026		MXAN_5199	0	0	0
MXAN_0574	0	0	0.0107871		MXAN_0574	0.0121358	0	0.00126655		MXAN_0574	0	0	0.0122026		MXAN_0574	0	0	0
upp	0	0	0.00597438		upp	0.00689877	0	0.00337748		upp	0	0	0.0122026		upp	0	0	0
MXAN_5214	0	0	0.00497865		MXAN_5214	0.00433061	0	0.018351		MXAN_5214	0	0	0.0122026		MXAN_5214	0	0	0
MXAN_3335	0	0	0.011119		MXAN_3335	0.00433061	0	0.0128344		MXAN_3335	0	0	0.0122026		MXAN_3335	0	0	0
MXAN_5450	0	0	0.00365101		MXAN_5450	0.0042299	0	0.0542085		MXAN_5450	0	0	0.0122026		MXAN_5450	0	0	0
gutQ	0	0	0.00315314		gutQ	0.00241709	0	0.0019139		gutQ	0	0	0.0122026		gutQ	0	0	0
MXAN_3812	0	0	0.000829775		MXAN_3812	0.000906407	0	0.00852813		MXAN_3812	0	0	0.0122026		MXAN_3812	0	0	0
MXAN_1947	0	0	0.00365101		MXAN_1947	0	0	0.00681124		MXAN_1947	0	0	0.0122026		MXAN_1947	0	0	0
gcvT(2)	0	0	0.00896157		gcvT(2)	0.0140493	0	0.0368145		gcvT(2)	0.0788827	0	0.0119253		gcvT(2)	0	0	0
MXAN_0390	0	0	0.0112849		MXAN_0390	0.0618371	0.0797708	0.012947		MXAN_0390	0	0	0.0119253		MXAN_0390	0	0	0
thiG	0	0	0.0104552		thiG	0.0314221	0.0322629	0.0274983		thiG	0	0	0.0119253		thiG	0	0	0
MXAN_2217	0	0	0.00713606		MXAN_2217	0.0252787	0.0258812	0.0101887		MXAN_2217	0	0	0.0119253		MXAN_2217	0	0	0
MXAN_2367	0	0	0.0170934		MXAN_2367	0.0230127	0.0202086	0.00683939		MXAN_2367	0	0	0.0119253		MXAN_2367	0	0	0
MXAN_3557	0	0	0.0313655		MXAN_3557	0.00654628	0.0202086	0.0180414		MXAN_3557	0	0	0.0119253		MXAN_3557	0	0	0
MXAN_2054	0	0	0.00580842		MXAN_2054	0.00679806	0.0138269	0.00534767		MXAN_2054	0	0	0.0119253		MXAN_2054	0	0	0
MXAN_5593	0	0	0.00298719		MXAN_5593	0.00876194	0.0109906	0.00377151		MXAN_5593	0	0	0.0119253		MXAN_5593	0	0	0
MXAN_0659	0	0	0.00945943		MXAN_0659	0.0092655	0.00425444	0.0404453		MXAN_0659	0	0	0.0119253		MXAN_0659	0	0	0
MXAN_0923	0	0	0.00746797		MXAN_0923	0.00699948	0	0.012553		MXAN_0923	0	0	0.0119253		MXAN_0923	0	0	0
MXAN_4471	0	0	0.00779988		MXAN_4471	0.00226602	0	0.000816223		MXAN_4471	0	0	0.0119253		MXAN_4471	0	0	0
MXAN_4290	0	0	0.00149359		MXAN_4290	0.0017121	0	0.01275		MXAN_4290	0	0	0.0119253		MXAN_4290	0	0	0
MXAN_2873	0	0	0.00614033		MXAN_2873	0.000704984	0	0.00287085		MXAN_2873	0	0	0.0119253		MXAN_2873	0	0	0
MXAN_5037	0	0	0.00531056		MXAN_5037	0	0	0.00244867		MXAN_5037	0	0	0.0119253		MXAN_5037	0	0	0
MXAN_6741	0	0	0.0051446		MXAN_6741	0	0	0.00242052		MXAN_6741	0	0	0.0119253		MXAN_6741	0	0	0
MXAN_0009	0	0	0.00265528		MXAN_0009	0	0	0.00157616		MXAN_0009	0	0	0.0119253		MXAN_0009	0	0	0
MXAN_6888	0	0	0.0051446		MXAN_6888	0	0	0.00121026		MXAN_6888	0	0	0.0119253		MXAN_6888	0	0	0
guaA	0	0	0.0099573		guaA	0.0101215	0.0095725	0.011202		guaA	0	0.511811	0.011648		guaA	0	0	0
MXAN_6589	0	0	0.00414887		MXAN_6589	0.00634485	0.00886343	0.0165215		MXAN_6589	0.0464016	0.472441	0.011648		MXAN_6589	0	0	0
zwf	0	0	0.00730202		zwf	0.0203942	0.0194995	0.029187		zwf	0.0510417	0	0.011648		zwf	0	0	0
MXAN_4464	0	0	0.0255571		MXAN_4464	0.0231134	0.0350992	0.0344221		MXAN_4464	0	0	0.011648		MXAN_4464	0	0	0
MXAN_7066	0	0	0.0255571		MXAN_7066	0.0231134	0.0350992	0.00830296		MXAN_7066	0	0	0.011648		MXAN_7066	0	0	0
gspC	0	0	0.00116168		gspC	0.0194374	0.0343901	0.00737416		gspC	0	0	0.011648		gspC	0	0	0
MXAN_4827	0	0	0		MXAN_4827	0.00644556	0.0198541	0.00182947		MXAN_4827	0	0	0.011648		MXAN_4827	0	0	0
MXAN_5126	0	0	0.0570885		MXAN_5126	0.0155096	0.0134724	0.0121026		MXAN_5126	0	0	0.011648		MXAN_5126	0	0	0
MXAN_2499	0	0	0.0132764		MXAN_2499	0.0154089	0.0134724	0.0272731		MXAN_2499	0	0	0.011648		MXAN_2499	0	0	0
MXAN_2064	0	0	0.0159317		MXAN_2064	0.00337385	0.0106361	0.00726157		MXAN_2064	0	0	0.011648		MXAN_2064	0	0	0
MXAN_5336	0	0	0.00763393		MXAN_5336	0.00120854	0.00921796	0.00993541		MXAN_5336	0	0	0.011648		MXAN_5336	0	0	0
MXAN_3920	0	0	0.00713606		MXAN_3920	0.00135961	0.00850889	0.00391224		MXAN_3920	0	0	0.011648		MXAN_3920	0	0	0
MXAN_5953	0	0.150426	0.00796584		MXAN_5953	0.0142004	0.00496352	0.00804965		MXAN_5953	0	0	0.011648		MXAN_5953	0	0	0
MXAN_0901	0	0	0.0051446		MXAN_0901	0.00579094	0	0.00712085		MXAN_0901	0	0	0.011648		MXAN_0901	0	0	0
MXAN_2202	0	0	0.0378377		MXAN_2202	0.00156103	0	0		MXAN_2202	0	0	0.011648		MXAN_2202	0	0	0
MXAN_6973	0	0	0.00564247		MXAN_6973	0	0	0.00242052		MXAN_6973	0	0	0.011648		MXAN_6973	0	0	0
MXAN_1278	0	0	0.0283783		MXAN_1278	0.0465793	0.0925342	0.043682		MXAN_1278	0	0	0.0113706		MXAN_1278	0	0	0
rpe	0	0	0.00564247		rpe	0.0481907	0.0538896	0.00796521		rpe	0	0	0.0113706		rpe	0	0	0
lolA	0	0	0.00564247		lolA	0.0153082	0.0404172	0.00796521		lolA	0	0	0.0113706		lolA	0	0	0
murI	0	0	0.00713606		murI	0.00997048	0.0308447	0.00177317		murI	0	0	0.0113706		murI	0	0	0
MXAN_6305	0	0	0.0124466		MXAN_6305	0.0111287	0.0212722	0.0093725		MXAN_6305	0	0	0.0113706		MXAN_6305	0	0	0
recX	0	0	0		recX	0.00634485	0.0194995	0.00180132		recX	0	0	0.0113706		recX	0	0	0
MXAN_0992	0	0	0.0104552		MXAN_0992	0.0135458	0.0166632	0.0188576		MXAN_0992	0	0	0.0113706		MXAN_0992	0	0	0
MXAN_4674	0	0	0.018255		MXAN_4674	0.0213006	0.0163087	0.0110612		MXAN_4674	0	0	0.0113706		MXAN_4674	0	0	0
pdxH	0	0	0		pdxH	0.0108769	0.0134724	0.00436257		pdxH	0	0	0.0113706		pdxH	0	0	0
MXAN_7163	0	0	0.0594119		MXAN_7163	0.00649592	0.0134724	0.0133692		MXAN_7163	0	0	0.0113706		MXAN_7163	0	0	0
MXAN_5592	0	0	0.01477		MXAN_5592	0.0322782	0.0131179	0.0738541		MXAN_5592	0	0	0.0113706		MXAN_5592	0	0	0
MXAN_4578	0	0	0.00414887		MXAN_4578	0.00659663	0.0102816	0.00118212		MXAN_4578	0	0	0.0113706		MXAN_4578	0	0	0
MXAN_5197	0	0	0.00431483		MXAN_5197	0.00166175	0.0102816	0.00531952		MXAN_5197	0	0	0.0113706		MXAN_5197	0	0	0
MXAN_3739	0	0.184337	0.0197486		MXAN_3739	0.00579094	0.00602713	0.00270198		MXAN_3739	0	0	0.0113706		MXAN_3739	0	0	0
MXAN_4873	0	0	0.00580842		MXAN_4873	0.0108769	0	0.00478476		MXAN_4873	0	0	0.0113706		MXAN_4873	0	0	0
MXAN_2739	0	0	0.00564247		MXAN_2739	0.00664699	0	0.00503807		MXAN_2739	0	0	0.0113706		MXAN_2739	0	0	0
MXAN_4309	0	0	0.00282123		MXAN_4309	0.00337385	0	0.00270198		MXAN_4309	0	0	0.0113706		MXAN_4309	0	0	0
MXAN_7058	0	0	0.00348505		MXAN_7058	0.00271922	0	0.00312417		MXAN_7058	0	0	0.0113706		MXAN_7058	0	0	0
MXAN_3342	0	0	0.0018255		MXAN_3342	0	0	0.00236423		MXAN_3342	0	0	0.0113706		MXAN_3342	0	0	0
MXAN_5330	0	0	0.0157657		MXAN_5330	0.0121358	0.0187905	0.0171125		MXAN_5330	0	1.85039	0.0110933		MXAN_5330	0	0	0
MXAN_1724	0	0	0.405428		MXAN_1724	0.0560462	0	0.091614		MXAN_1724	0.348012	0	0.0110933		MXAN_1724	0	0	0
MXAN_6123	0	0	0		MXAN_6123	0.0331342	0.067362	0.0157616		MXAN_6123	0.343372	0	0.0110933		MXAN_6123	0	0	0
MXAN_6883	0	0	0.0310336		MXAN_6883	0.106251	0.183296	0.0243178		MXAN_6883	0	0	0.0110933		MXAN_6883	0	0	0
MXAN_2058	0	0	0.0318634		MXAN_2058	0.024473	0.112743	0.0207152		MXAN_2058	0	0	0.0110933		MXAN_2058	0	0	0
tpx	0	0	0.0134424		tpx	0.0586647	0.0758709	0.00698012		tpx	0	0	0.0110933		tpx	0	0	0
MXAN_0350	0	0	0.0119488		MXAN_0350	0.00891301	0.0368718	0.00847184		MXAN_0350	0	0	0.0110933		MXAN_0350	0	0	0
MXAN_5666	0	0	0.011119		MXAN_5666	0.00392777	0.0244631	0.0173659		MXAN_5666	0	0	0.0110933		MXAN_5666	0	0	0
eno	0	0	0.0112849		eno	0.0525213	0.023754	0.0538707		eno	0	0	0.0110933		eno	0	0	0
MXAN_2418	0	0	0.0132764		MXAN_2418	0	0.0187905	0.00230794		MXAN_2418	0	0	0.0110933		MXAN_2418	0	0	0
MXAN_6927	0	0	0.00365101		MXAN_6927	0.0042299	0.0131179	0.00498178		MXAN_6927	0	0	0.0110933		MXAN_6927	0	0	0
MXAN_4346	0	0	0.0207444		MXAN_4346	0.0145529	0.00992704	0.00374337		MXAN_4346	0	0	0.0110933		MXAN_4346	0	0	0
MXAN_6577	0	0	0.00248932		MXAN_6577	0.00599236	0.00460898	0.0108361		MXAN_6577	0	0	0.0110933		MXAN_6577	0	0	0
MXAN_7109	0	0	0.011119		MXAN_7109	0.00649592	0	0.00897846		MXAN_7109	0	0	0.0110933		MXAN_7109	0	0	0
MXAN_1961	0	0	0.00564247		MXAN_1961	0.00493488	0	0.00233609		MXAN_1961	0	0	0.0110933		MXAN_1961	0	0	0
MXAN_3701	0	0	0.014604		MXAN_3701	0.00453204	0	0.00571356		MXAN_3701	0	0	0.0110933		MXAN_3701	0	0	0
tps	0	0	0		tps	0	0	0.00334933		tps	0.190246	0	0.010816		tps	0	0	0
MXAN_5025	0	0	0.0287102		MXAN_5025	0.000956763	0.00567259	0.00441886		MXAN_5025	0.0649622	0	0.010816		MXAN_5025	0	0	0
MXAN_5020	0	0	0.00796584		MXAN_5020	0.0278972	0.0287175	0.0250778		MXAN_5020	0.060322	0	0.010816		MXAN_5020	0	0	0
sdhC	0	0.404541	0.00365101		sdhC	0.0105244	0.0517624	0.0578956		sdhC	0	0	0.010816		sdhC	0	0	0
MXAN_3200	0	0	0.00962539		MXAN_3200	0.146939	0.0333265	0.0409238		MXAN_3200	0	0	0.010816		MXAN_3200	0	0	0
aglU	0	0	0.0155998		aglU	0.00659663	0.0226904	0.00810594		aglU	0	0	0.010816		aglU	0	0	0
MXAN_5156	0	0	0.0313655		MXAN_5156	0.011179	0.0198541	0.00455959		MXAN_5156	0	0	0.010816		MXAN_5156	0	0	0
MXAN_4651	0	0.305416	0.00813179		MXAN_4651	0.0175239	0.0194995	0.0271887		MXAN_4651	0	0	0.010816		MXAN_4651	0	0	0
glyS	0	0	0.0107871		glyS	0.0111287	0.0173723	0.0157616		glyS	0	0	0.010816		glyS	0	0	0
MXAN_6352	0	0	0.0149359		MXAN_6352	0.00292065	0.0138269	0.0232483		MXAN_6352	0	0	0.010816		MXAN_6352	0	0	0
MXAN_3513	0	0	0.00896157		MXAN_3513	0	0.0127633	0.0106672		MXAN_3513	0	0	0.010816		MXAN_3513	0	0	0
MXAN_5616	0	0	0.00896157		MXAN_5616	0.00790589	0.0124088	0.00284271		MXAN_5616	0	0	0.010816		MXAN_5616	0	0	0
MXAN_1424	0	0	0.0136083		MXAN_1424	0.00473346	0.00992704	0.0138195		MXAN_1424	0	0	0.010816		MXAN_1424	0	0	0
gspD	0	0.0849948	0.00149359		gspD	0.00448168	0.00815435	0.0109205		gspD	0	0	0.010816		gspD	0	0	0
MXAN_1394	0	0	0.0177572		MXAN_1394	0.0176749	0	0.0228824		MXAN_1394	0	0	0.010816		MXAN_1394	0	0	0
MXAN_5770	0	0	0.0192508		MXAN_5770	0.0108769	0	0.0331837		MXAN_5770	0	0	0.010816		MXAN_5770	0	0	0
MXAN_7192	0	0	0.0283783		MXAN_7192	0.00825838	0	0.00374337		MXAN_7192	0	0	0.010816		MXAN_7192	0	0	0
agmH	0	0	0.0177572		agmH	0.00483417	0	0.0103013		agmH	0	0	0.010816		agmH	0	0	0
MXAN_4955	0	0	0.00132764		MXAN_4955	0.00317243	0	0.00509436		MXAN_4955	0	0	0.010816		MXAN_4955	0	0	0
MXAN_3572	0	0	0.0142721		MXAN_3572	0.00120854	0	0.00197019		MXAN_3572	0	0	0.010816		MXAN_3572	0	0	0
MXAN_2697	0	0	0.00531056		MXAN_2697	0	0	0.00486919		MXAN_2697	0	0	0.010816		MXAN_2697	0	0	0
MXAN_6868	0	0	0		MXAN_6868	0	0	0.00332118		MXAN_6868	0	0	0.010816		MXAN_6868	0	0	0
MXAN_0268	0	0	0.0051446		MXAN_0268	0	0	0.00281456		MXAN_0268	0	0	0.010816		MXAN_0268	0	0	0
MXAN_0453	0	0	0.00779988		MXAN_0453	0	0	0		MXAN_0453	0	0	0.010816		MXAN_0453	0	0	0
MXAN_5680	0	0	0.0174253		MXAN_5680	0.0194374	0.0109906	0.0107235		MXAN_5680	0	0.393701	0.0105386		MXAN_5680	0	0	0
MXAN_3104	0	0	0.0290421		MXAN_3104	0.01697	0.0095725	0.0447234		MXAN_3104	0.102083	0	0.0105386		MXAN_3104	0	0	0
argG	0	0	0.000829775		argG	0.0042299	0.00638167	0.00903475		argG	0.0696023	0	0.0105386		argG	0	0	0
MXAN_2563	0	0	0		MXAN_2563	0.00322278	0.00815435	0.00346191		MXAN_2563	0.0417614	0	0.0105386		MXAN_2563	0	0	0
MXAN_2180	0	0	0		MXAN_2180	0.057154	0.0755164	0.00591058		MXAN_2180	0	0	0.0105386		MXAN_2180	0	0	0
MXAN_5752	0	0	0.0127785		MXAN_5752	0.0249262	0.0460898	0.0133692		MXAN_5752	0	0	0.0105386		MXAN_5752	0	0	0
difD	0	0	0.0139402		difD	0.042299	0.0322629	0.04599		difD	0	0	0.0105386		difD	0	0	0
MXAN_4681	0	0	0.00464674		MXAN_4681	0.00528738	0.0322629	0.00106953		MXAN_4681	0	0	0.0105386		MXAN_4681	0	0	0
MXAN_7508	0	0	0.00132764		MXAN_7508	0.00936621	0.029072	0.00334933		MXAN_7508	0	0	0.0105386		MXAN_7508	0	0	0
MXAN_5032	0	0	0.00896157		MXAN_5032	0.0105244	0.0226904	0.00439072		MXAN_5032	0	0	0.0105386		MXAN_5032	0	0	0
MXAN_0650	0	0	0.00614033		MXAN_0650	5.0356e-05	0.0180814	0.00971024		MXAN_0650	0	0	0.0105386		MXAN_0650	0	0	0
frzS	0	0	0.00730202		frzS	0.00780517	0.0131179	0.0122715		frzS	0	0	0.0105386		frzS	0	0	0
MXAN_5866	0	0	0.0189189		MXAN_5866	0.00201424	0.0124088	0.00942879		MXAN_5866	0	0	0.0105386		MXAN_5866	0	0	0
MXAN_3761	0	0	0.0117828		MXAN_3761	0.0154089	0.0095725	0.00959766		MXAN_3761	0	0	0.0105386		MXAN_3761	0	0	0
MXAN_1979	0	0	0.00398292		MXAN_1979	0.00307171	0.0095725	0.00329304		MXAN_1979	0	0	0.0105386		MXAN_1979	0	0	0
agmX	0	0	0.0212422		agmX	0.0127904	0.00709074	0.0178162		agmX	0	0	0.0105386		agmX	0	0	0
MXAN_6038	0	0	0.0131104		MXAN_6038	0.0228113	0.0067362	0.0379685		MXAN_6038	0	0	0.0105386		MXAN_6038	0	0	0
MXAN_3749	0	0	0.00398292		MXAN_3749	0.00433061	0.0028363	0.00185761		MXAN_3749	0	0	0.0105386		MXAN_3749	0	0	0
MXAN_4409	0	0	0		MXAN_4409	0.0154089	0	0.0279768		MXAN_4409	0	0	0.0105386		MXAN_4409	0	0	0
MXAN_5347	0	0	0.0051446		MXAN_5347	0.00604272	0	0.005798		MXAN_5347	0	0	0.0105386		MXAN_5347	0	0	0
MXAN_2331	0	0	0.00531056		MXAN_2331	0.00463275	0	0.00385595		MXAN_2331	0	0	0.0105386		MXAN_2331	0	0	0
MXAN_0549	0	0	0		MXAN_0549	0.002971	0	0.00720528		MXAN_0549	0	0	0.0105386		MXAN_0549	0	0	0
leuS(2)	0	0	0.00199146		leuS(2)	0.00281993	0	0.0090066		leuS(2)	0	0	0.0105386		leuS(2)	0	0	0
plsX(1)	0	0	0.01477		plsX(1)	0.00246744	0	0.0146076		plsX(1)	0	0	0.0105386		plsX(1)	0	0	0
MXAN_3971	0	0	0.00713606		MXAN_3971	0.00140997	0	0.00582615		MXAN_3971	0	0	0.0105386		MXAN_3971	0	0	0
MXAN_7178	0	0	0		MXAN_7178	0	0	0		MXAN_7178	0	0	0.0105386		MXAN_7178	0	0	0
MXAN_6988	0	0	0.00531056		MXAN_6988	0.0155096	0.0319083	0.0113708		MXAN_6988	0	0	0.0102613		MXAN_6988	0	0	0
MXAN_0729	0	0	0.0350165		MXAN_0729	0.0227609	0.0280084	0.0123841		MXAN_0729	0	0	0.0102613		MXAN_0729	0	0	0
MXAN_4748	0	0	0.00248932		MXAN_4748	0.019387	0.0276539	0.00106953		MXAN_4748	0	0	0.0102613		MXAN_4748	0	0	0
MXAN_2271	0	0	0.0424845		MXAN_2271	0.00866123	0.0177269	0.0064735		MXAN_2271	0	0	0.0102613		MXAN_2271	0	0	0
MXAN_5091	0	0	0.0267188		MXAN_5091	0.00196388	0.0120543	0.00633277		MXAN_5091	0	0	0.0102613		MXAN_5091	0	0	0
MXAN_6050	0	0	0.00829775		MXAN_6050	0.00372634	0.0113452	0.0158178		MXAN_6050	0	0	0.0102613		MXAN_6050	0	0	0
MXAN_5187	0	0	0.00315314		MXAN_5187	0.00735197	0.00992704	0.00520694		MXAN_5187	0	0	0.0102613		MXAN_5187	0	0	0
MXAN_6085	0	0	0.0180891		MXAN_6085	0.0135961	0.00921796	0.0509717		MXAN_6085	0	0	0.0102613		MXAN_6085	0	0	0
MXAN_2808	0	0	0.00597438		MXAN_2808	0.00352492	0.00531806	0.017197		MXAN_2808	0	0	0.0102613		MXAN_2808	0	0	0
MXAN_0339	0	0	0.00497865		MXAN_0339	0.0255808	0	0.00478476		MXAN_0339	0	0	0.0102613		MXAN_0339	0	0	0
MXAN_3387	0	0	0.0051446		MXAN_3387	0.0198403	0	0.00895031		MXAN_3387	0	0	0.0102613		MXAN_3387	0	0	0
MXAN_1417	0	0	0.00132764		MXAN_1417	0.0182289	0	0.0148327		MXAN_1417	0	0	0.0102613		MXAN_1417	0	0	0
MXAN_7400	0	0	0.00779988		MXAN_7400	0.0136968	0	0.0200397		MXAN_7400	0	0	0.0102613		MXAN_7400	0	0	0
MXAN_4172	0	0	0.00265528		MXAN_4172	0.0101215	0	0.0054884		MXAN_4172	0	0	0.0102613		MXAN_4172	0	0	0
MXAN_1452	0	0	0.0066382		MXAN_1452	0.00704984	0	0.000534767		MXAN_1452	0	0	0.0102613		MXAN_1452	0	0	0
MXAN_5753	0	0	0.0084637		MXAN_5753	0.005942	0	0.00467218		MXAN_5753	0	0	0.0102613		MXAN_5753	0	0	0
MXAN_5579	0	0	0.00099573		MXAN_5579	0.00493488	0	0.00303973		MXAN_5579	0	0	0.0102613		MXAN_5579	0	0	0
MXAN_6784	0	0	0.00497865		MXAN_6784	0.00392777	0	0.0038841		MXAN_6784	0	0	0.0102613		MXAN_6784	0	0	0
MXAN_5667	0	0	0.00248932		MXAN_5667	0.002971	0	0.000788078		MXAN_5667	0	0	0.0102613		MXAN_5667	0	0	0
MXAN_4399	0	0	0.00497865		MXAN_4399	0.00281993	0	0.00211092		MXAN_4399	0	0	0.0102613		MXAN_4399	0	0	0
MXAN_5150	0	0	0		MXAN_5150	0	0	0.00526323		MXAN_5150	0	0	0.0102613		MXAN_5150	0	0	0
MXAN_5063	0	0	0.00215741		MXAN_5063	0	0	0.00149172		MXAN_5063	0	0	0.0102613		MXAN_5063	0	0	0
MXAN_4653	0	0	0.0278804		MXAN_4653	0.0401337	0.0471534	0.0447516		MXAN_4653	0	0	0.00998397		MXAN_4653	0	0	0
MXAN_4175	0	0	0.0126126		MXAN_4175	0.0306668	0.0244631	0.0163808		MXAN_4175	0	0	0.00998397		MXAN_4175	0	0	0
lepB	0	0	0.00497865		lepB	0.00694912	0.0184359	0.00692383		lepB	0	0	0.00998397		lepB	0	0	0
MXAN_0607	0	0	0.00448078		MXAN_0607	0.00518666	0.0159542	0.00346191		MXAN_0607	0	0	0.00998397		MXAN_0607	0	0	0
MXAN_5326	0	0	0.0101233		MXAN_5326	0.0239191	0.0124088	0.027639		MXAN_5326	0	0	0.00998397		MXAN_5326	0	0	0
MXAN_4976	0	0	0.0099573		MXAN_4976	0.00196388	0.0120543	0.00455959		MXAN_4976	0	0	0.00998397		MXAN_4976	0	0	0
MXAN_2585	0	0	0.0278804		MXAN_2585	0.00191353	0.0116997	0.0106672		MXAN_2585	0	0	0.00998397		MXAN_2585	0	0	0
MXAN_2804	0	0	0.00614033		MXAN_2804	0.00780517	0.0067362	0.00925991		MXAN_2804	0	0	0.00998397		MXAN_2804	0	0	0
MXAN_4965	0	0	0.00165955		MXAN_4965	0.0101215	0.00638167	0.00405297		MXAN_4965	0	0	0.00998397		MXAN_4965	0	0	0
aglT	0	0	0.0245613		aglT	0.0161643	0.00531806	0.0468062		aglT	0	0	0.00998397		aglT	0	0	0
MXAN_4030	0	0	0.00862966		MXAN_4030	0.00488453	0.00531806	0.00143543		MXAN_4030	0	0	0.00998397		MXAN_4030	0	0	0
MXAN_4330	0	0	0.0131104		MXAN_4330	0.000856051	0.00531806	0.00295529		MXAN_4330	0	0	0.00998397		MXAN_4330	0	0	0
MXAN_4700	0	0	0.0051446		MXAN_4700	0.00856051	0.00496352	0.0115397		MXAN_4700	0	0	0.00998397		MXAN_4700	0	0	0
MXAN_6119	0	0	0.0632289		MXAN_6119	0.0205452	0	0.0269072		MXAN_6119	0	0	0.00998397		MXAN_6119	0	0	0
agmO	0	0	0.0456376		agmO	0.0194374	0	0.0630744		agmO	0	0	0.00998397		agmO	0	0	0
MXAN_5006	0	0	0.0134424		MXAN_5006	0.0152075	0	0.00101324		MXAN_5006	0	0	0.00998397		MXAN_5006	0	0	0
pyrB	0	0	0.00132764		pyrB	0.0104237	0	0.00422185		pyrB	0	0	0.00998397		pyrB	0	0	0
MXAN_2267	0	0	0.00099573		MXAN_2267	0.00951728	0	0.0090066		MXAN_2267	0	0	0.00998397		MXAN_2267	0	0	0
MXAN_3516	0	0	0		MXAN_3516	0.00835909	0	0.0108642		MXAN_3516	0	0	0.00998397		MXAN_3516	0	0	0
MXAN_5484	0	0	0.0262209		MXAN_5484	0.00765411	0	0.0106672		MXAN_5484	0	0	0.00998397		MXAN_5484	0	0	0
MXAN_1970	0	0	0.0492886		MXAN_1970	0.005942	0	0.00394039		MXAN_1970	0	0	0.00998397		MXAN_1970	0	0	0
MXAN_0294	0	0	0.00896157		MXAN_0294	0.00513631	0	0.0103576		MXAN_0294	0	0	0.00998397		MXAN_0294	0	0	0
MXAN_0955	0	0	0.0033191		MXAN_0955	0.00191353	0	0.00208278		MXAN_0955	0	0	0.00998397		MXAN_0955	0	0	0
hemF	0	0	0.0137743		hemF	0.00146032	0	0.00700826		hemF	0	0	0.00998397		hemF	0	0	0
MXAN_1319	0	0	0.115339		MXAN_1319	0.00146032	0	0		MXAN_1319	0	0	0.00998397		MXAN_1319	0	0	0
apt	0	0	0.00962539		apt	0	0	0.0118775		apt	0	0	0.00998397		apt	0	0	0
MXAN_4755	0	0	0.00448078		MXAN_4755	0	0	0.0061076		MXAN_4755	0	0	0.00998397		MXAN_4755	0	0	0
MXAN_3567	0	0	0		MXAN_3567	0	0	0.00101324		MXAN_3567	0	0	0.00998397		MXAN_3567	0	0	0
MXAN_4727	0	0	0.00464674		MXAN_4727	0.0380188	0.0166632	0.0403327		MXAN_4727	0.352652	0	0.00970664		MXAN_4727	0	0	0
MXAN_7064	0	0	0.00862966		MXAN_7064	0.0296093	0.0904069	0.0256688		MXAN_7064	0	0	0.00970664		MXAN_7064	0	0	0
MXAN_6708	0	0	0.00232337		MXAN_6708	0.024473	0.066653	0.00503807		MXAN_6708	0	0	0.00970664		MXAN_6708	0	0	0
MXAN_6968	0	0	0.0131104		MXAN_6968	0.0199913	0.0304902	0.00101324		MXAN_6968	0	0	0.00970664		MXAN_6968	0	0	0
MXAN_4420	0	0	0		MXAN_4420	0.00498524	0.0304902	0.0220662		MXAN_4420	0	0	0.00970664		MXAN_4420	0	0	0
MXAN_5819	0	0	0.00680415		MXAN_5819	0.017121	0.0212722	0.00802151		MXAN_5819	0	0	0.00970664		MXAN_5819	0	0	0
MXAN_5686	0	0	0.0116168		MXAN_5686	0.0296597	0.0166632	0.026485		MXAN_5686	0	0	0.00970664		MXAN_5686	0	0	0
MXAN_0742	0	0	0.0260549		MXAN_0742	0.0191353	0.0166632	0.0121871		MXAN_0742	0	0	0.00970664		MXAN_0742	0	0	0
cheW(3)	0	0	0.00929348		cheW(3)	0.0107762	0.0166632	0.00199834		cheW(3)	0	0	0.00970664		cheW(3)	0	0	0
hflX	0	0	0.0099573		hflX	0.00438097	0.0134724	0.00616389		hflX	0	0	0.00970664		hflX	0	0	0
MXAN_3337	0	0	0.0033191		MXAN_3337	0.0113301	0.0116997	0.00987912		MXAN_3337	0	0	0.00970664		MXAN_3337	0	0	0
MXAN_0553	0	0	0.00630629		MXAN_0553	0.00558951	0.0113452	0.00835925		MXAN_0553	0	0	0.00970664		MXAN_0553	0	0	0
MXAN_6053	0	0	0.0155998		MXAN_6053	0.0050356	0.0102816	0.00596687		MXAN_6053	0	0	0.00970664		MXAN_6053	0	0	0
argB	0	0	0.00116168		argB	0.00710019	0.00886343	0.00982283		argB	0	0	0.00970664		argB	0	0	0
MXAN_5481	0	0	0.0283783		MXAN_5481	0.00287029	0.00886343	0.000506621		MXAN_5481	0	0	0.00970664		MXAN_5481	0	0	0
dnaK(3)	0	0	0.00381696		dnaK(3)	0.0072009	0.00815435	0.0237268		dnaK(3)	0	0	0.00970664		dnaK(3)	0	0	0
MXAN_0751	0	0	0.00730202		MXAN_0751	0.0118337	0.0067362	0.0111457		MXAN_0751	0	0	0.00970664		MXAN_0751	0	0	0
iorB(2)	0	0	0.0018255		iorB(2)	0.00161139	0.0067362	0.00326489		iorB(2)	0	0	0.00970664		iorB(2)	0	0	0
pdxJ	0	0	0.00165955		pdxJ	0.0280483	0	0.00909104		pdxJ	0	0	0.00970664		pdxJ	0	0	0
MXAN_6621	0	0	0.0126126		MXAN_6621	0.0114812	0	0.00883773		MXAN_6621	0	0	0.00970664		MXAN_6621	0	0	0
MXAN_2665	0	0	0.00796584		MXAN_2665	0.00931585	0	0.0214188		MXAN_2665	0	0	0.00970664		MXAN_2665	0	0	0
atpB	0	0	0.0172593		atpB	0.00725126	0	0.0364767		atpB	0	0	0.00970664		atpB	0	0	0
MXAN_7467	0	0	0.00879561		MXAN_7467	0.00498524	0	0		MXAN_7467	0	0	0.00970664		MXAN_7467	0	0	0
MXAN_3384	0	0	0		MXAN_3384	0.00276958	0	0.00205463		MXAN_3384	0	0	0.00970664		MXAN_3384	0	0	0
MXAN_4898	0	0	0.010953		MXAN_4898	0.00115819	0	0.000619204		MXAN_4898	0	0	0.00970664		MXAN_4898	0	0	0
MXAN_7298	0	0	0.0449738		MXAN_7298	0.000956763	0	0.00118212		MXAN_7298	0	0	0.00970664		MXAN_7298	0	0	0
MXAN_6798	0	0	0.00813179		MXAN_6798	0	0	0.00385595		MXAN_6798	0	0	0.00970664		MXAN_6798	0	0	0
MXAN_0714	0	0	0.00713606		MXAN_0714	0	0	0.00306787		MXAN_0714	0	0	0.00970664		MXAN_0714	0	0	0
MXAN_6218	0	0	0.00315314		MXAN_6218	0	0	0.00270198		MXAN_6218	0	0	0.00970664		MXAN_6218	0	0	0
MXAN_6361	0	0	0		MXAN_6361	0	0	0.00151986		MXAN_6361	0	0	0.00970664		MXAN_6361	0	0	0
MXAN_4990	0	0	0		MXAN_4990	0	0	0.000506621		MXAN_4990	0	0	0.00970664		MXAN_4990	0	0	0
MXAN_3819	0	0	0.00099573		MXAN_3819	0	0	0		MXAN_3819	0	0	0.00970664		MXAN_3819	0	0	0
MXAN_3453	0	0	0.0084637		MXAN_3453	0.00634485	0	0.0239238		MXAN_3453	0.0371212	0	0.00942931		MXAN_3453	0	0	0
MXAN_6350	0	0	0.02954		MXAN_6350	0.0144018	0.117352	0.0133973		MXAN_6350	0	0	0.00942931		MXAN_6350	0	0	0
MXAN_6518	0	0	0.0112849		MXAN_6518	0.0316235	0.0322629	0.0424436		MXAN_6518	0	0	0.00942931		MXAN_6518	0	0	0
MXAN_0882	0	0	0.014604		MXAN_0882	0.0146536	0.0301356	0.000985097		MXAN_0882	0	0	0.00942931		MXAN_0882	0	0	0
MXAN_1946	0	0	0.00481269		MXAN_1946	0.0166678	0.0170178	0.00664237		MXAN_1946	0	0	0.00942931		MXAN_1946	0	0	0
MXAN_1457	0	0	0.00232337		MXAN_1457	0.00523702	0.0159542	0.00242052		MXAN_1457	0	0	0.00942931		MXAN_1457	0	0	0
MXAN_3666	0	0	0.0114509		MXAN_3666	0.0112294	0.0138269	0.00430628		MXAN_3666	0	0	0.00942931		MXAN_3666	0	0	0
MXAN_4675	0	0	0.0116168		MXAN_4675	0.00342421	0.00709074	0.00737416		MXAN_4675	0	0	0.00942931		MXAN_4675	0	0	0
MXAN_1744	0	0	0.00448078		MXAN_1744	0.00292065	0.00709074	0.0109768		MXAN_1744	0	0	0.00942931		MXAN_1744	0	0	0
ccmF	0	0.22216	0.0112849		ccmF	0.0186821	0.00354537	0.0429784		ccmF	0	0	0.00942931		ccmF	0	0	0
MXAN_5596	0	0	0.0084637		MXAN_5596	0.0240198	0	0.00765561		MXAN_5596	0	0	0.00942931		MXAN_5596	0	0	0
MXAN_3085	0	0	0.00431483		MXAN_3085	0.0194878	0	0.0116804		MXAN_3085	0	0	0.00942931		MXAN_3085	0	0	0
MXAN_5160	0	0	0.0169274		MXAN_5160	0.019236	0	0.0133973		MXAN_5160	0	0	0.00942931		MXAN_5160	0	0	0
MXAN_6857	0	0	0		MXAN_6857	0.00563987	0	0.000394039		MXAN_6857	0	0	0.00942931		MXAN_6857	0	0	0
MXAN_5022	0	0	0.0341867		MXAN_5022	0.00488453	0	0		MXAN_5022	0	0	0.00942931		MXAN_5022	0	0	0
trxB(2)	0	0	0		trxB(2)	0.00488453	0	0		trxB(2)	0	0	0.00942931		trxB(2)	0	0	0
MXAN_1371	0	0	0		MXAN_1371	0.00478382	0	0.0019139		MXAN_1371	0	0	0.00942931		MXAN_1371	0	0	0
MXAN_1996	0	0	0.00464674		MXAN_1996	0.00367599	0	0.00593873		MXAN_1996	0	0	0.00942931		MXAN_1996	0	0	0
MXAN_4021	0	0	0.00232337		MXAN_4021	0.00266887	0	0.00295529		MXAN_4021	0	0	0.00942931		MXAN_4021	0	0	0
MXAN_2703	0	0	0.00315314		MXAN_2703	0.00181281	0	0.00495363		MXAN_2703	0	0	0.00942931		MXAN_2703	0	0	0
MXAN_2989	0	0	0.00365101		MXAN_2989	0.00140997	0	0.0101606		MXAN_2989	0	0	0.00942931		MXAN_2989	0	0	0
MXAN_5065	0	0	0.00647224		MXAN_5065	0.000956763	0	0.00064735		MXAN_5065	0	0	0.00942931		MXAN_5065	0	0	0
MXAN_0658	0	0	0.0160976		MXAN_0658	0	0	0.0198427		MXAN_0658	0	0	0.00942931		MXAN_0658	0	0	0
MXAN_5946	0	0	0.00813179		MXAN_5946	0	0	0.00430628		MXAN_5946	0	0	0.00942931		MXAN_5946	0	0	0
pth	0	0	0		pth	0	0	0.00391224		pth	0	0	0.00942931		pth	0	0	0
MXAN_7492	0	0	0.0126126		MXAN_7492	0	0	0.00332118		MXAN_7492	0	0	0.00942931		MXAN_7492	0	0	0
MXAN_1861	0	0	0		MXAN_1861	0	0	0		MXAN_1861	0	0	0.00942931		MXAN_1861	0	0	0
MXAN_6277	0	0	0.00647224		MXAN_6277	0	0	0		MXAN_6277	0.0742425	0	0.00915197		MXAN_6277	0	0	0
MXAN_2429	0	0	0.00431483		MXAN_2429	0.00221566	0	0.0207433		MXAN_2429	0.0371212	0	0.00915197		MXAN_2429	0	0	0
MXAN_1146	0	0	0.0255571		MXAN_1146	0.0403351	0.0758709	0.00346191		MXAN_1146	0	0	0.00915197		MXAN_1146	0	0	0
MXAN_4183	0	0	0.00763393		MXAN_4183	0.00896336	0.0223358	0.0219254		MXAN_4183	0	0	0.00915197		MXAN_4183	0	0	0
MXAN_5131	0	0	0.0152679		MXAN_5131	0.0107258	0.0219813	0.0137914		MXAN_5131	0	0	0.00915197		MXAN_5131	0	0	0
MXAN_3554	0	0	0.00829775		MXAN_3554	0.0194374	0.0202086	0.0122996		MXAN_3554	0	0	0.00915197		MXAN_3554	0	0	0
hprK	0	0	0.00580842		hprK	0.0067477	0.0166632	0.00669866		hprK	0	0	0.00915197		hprK	0	0	0
MXAN_1514	0	0	0.00763393		MXAN_1514	0.00538809	0.0109906	0.0041937		MXAN_1514	0	0	0.00915197		MXAN_1514	0	0	0
pccA	0	0	0.00945943		pccA	0.0184303	0.00992704	0.0469751		pccA	0	0	0.00915197		pccA	0	0	0
MXAN_2502	0	0	0.00232337		MXAN_2502	0.00538809	0.00815435	0.0104702		MXAN_2502	0	0	0.00915197		MXAN_2502	0	0	0
speA	0	0	0.00531056		speA	0.00840945	0.00354537	0.00945693		speA	0	0	0.00915197		speA	0	0	0
MXAN_3003	0	0	0.00746797		MXAN_3003	0.0140493	0	0.0144387		MXAN_3003	0	0	0.00915197		MXAN_3003	0	0	0
MXAN_3781	0	0	0.00912752		MXAN_3781	0.0105748	0	0.0107235		MXAN_3781	0	0	0.00915197		MXAN_3781	0	0	0
MXAN_4056	0	0	0.00232337		MXAN_4056	0.00946692	0	0.00692383		MXAN_4056	0	0	0.00915197		MXAN_4056	0	0	0
MXAN_1436	0	0	0.00282123		MXAN_1436	0.00866123	0	0.00588244		MXAN_1436	0	0	0.00915197		MXAN_1436	0	0	0
MXAN_1671	0	0	0.00149359		MXAN_1671	0.00735197	0	0.0618922		MXAN_1671	0	0	0.00915197		MXAN_1671	0	0	0
MXAN_3638	0	0	0.00779988		MXAN_3638	0.00553916	0	0.0238394		MXAN_3638	0	0	0.00915197		MXAN_3638	0	0	0
MXAN_4707	0	0	0.00116168		MXAN_4707	0.00538809	0	0.00236423		MXAN_4707	0	0	0.00915197		MXAN_4707	0	0	0
hscB	0	0	0		hscB	0.00513631	0	0.000956952		hscB	0	0	0.00915197		hscB	0	0	0
MXAN_0741	0	0	0.0107871		MXAN_0741	0.00357527	0	0.00194205		MXAN_0741	0	0	0.00915197		MXAN_0741	0	0	0
MXAN_3719	0	0	0.0033191		MXAN_3719	0.00317243	0	0.00399668		MXAN_3719	0	0	0.00915197		MXAN_3719	0	0	0
MXAN_6732	0	0	0		MXAN_6732	0	0	0.00503807		MXAN_6732	0	0	0.00915197		MXAN_6732	0	0	0
MXAN_3649	0	0	0.00896157		MXAN_3649	0	0	0.000478476		MXAN_3649	0	0	0.00915197		MXAN_3649	0	0	0
MXAN_3969	0	0	0.00746797		MXAN_3969	0.00347456	0	0.00804965		MXAN_3969	0.111364	0	0.00887464		MXAN_3969	0	0	0
MXAN_5741	0	0	0.0101233		MXAN_5741	0.0278972	0.0737437	0.00444701		MXAN_5741	0	0	0.00887464		MXAN_5741	0	0	0
MXAN_4810	0	0	0.0532716		MXAN_4810	0.0280986	0.0570805	0.0176755		MXAN_4810	0	0	0.00887464		MXAN_4810	0	0	0
MXAN_6513	0	0	0.00431483		MXAN_6513	0.0101215	0.0464443	0.00278642		MXAN_6513	0	0	0.00887464		MXAN_6513	0	0	0
MXAN_3332	0	0	0.00547651		MXAN_3332	0.00322278	0.0198541	0.00242052		MXAN_3332	0	0	0.00887464		MXAN_3332	0	0	0
MXAN_4073	0	0	0.0107871		MXAN_4073	0.00634485	0.0194995	0.00166059		MXAN_4073	0	0	0.00887464		MXAN_4073	0	0	0
maf(2)	0	0	0.00879561		maf(2)	0.00256815	0.0155996	0.00233609		maf(2)	0	0	0.00887464		maf(2)	0	0	0
MXAN_3504	0	0	0.0107871		MXAN_3504	0.00246744	0.0152451	0.00413741		MXAN_3504	0	0	0.00887464		MXAN_3504	0	0	0
MXAN_3751	0	0.201727	0.0018255		MXAN_3751	0.00211495	0.0131179	0.00515065		MXAN_3751	0	0	0.00887464		MXAN_3751	0	0	0
hslU	0	0	0.00531056		hslU	0.0285015	0.0109906	0.0122434		hslU	0	0	0.00887464		hslU	0	0	0
MXAN_1998	0	0	0.0179231		MXAN_1998	0.00699948	0.0106361	0.0175066		MXAN_1998	0	0	0.00887464		MXAN_1998	0	0	0
MXAN_1980	0	0	0.00149359		MXAN_1980	0.00513631	0.0106361	0.000928806		MXAN_1980	0	0	0.00887464		MXAN_1980	0	0	0
MXAN_6107	0	0	0.00448078		MXAN_6107	0.00664699	0.00815435	0.00636091		MXAN_6107	0	0	0.00887464		MXAN_6107	0	0	0
MXAN_2498	0	0	0.00912752		MXAN_2498	0.00805695	0.00319083	0.0301721		MXAN_2498	0	0	0.00887464		MXAN_2498	0	0	0
MXAN_0412	0	0	0.00298719		MXAN_0412	0.017121	0	0.0251059		MXAN_0412	0	0	0.00887464		MXAN_0412	0	0	0
MXAN_3019	0	0	0.00813179		MXAN_3019	0.00936621	0	0.0204619		MXAN_3019	0	0	0.00887464		MXAN_3019	0	0	0
MXAN_3049	0	0	0.0122807		MXAN_3049	0.00936621	0	0.000928806		MXAN_3049	0	0	0.00887464		MXAN_3049	0	0	0
MXAN_5524	0	0	0.0242294		MXAN_5524	0.0092655	0	0.0183228		MXAN_5524	0	0	0.00887464		MXAN_5524	0	0	0
MXAN_6663	0	0	0.0033191		MXAN_6663	0.00916479	0	0.0124404		MXAN_6663	0	0	0.00887464		MXAN_6663	0	0	0
MXAN_4631	0	0	0		MXAN_4631	0.0050356	0	0.0093162		MXAN_4631	0	0	0.00887464		MXAN_4631	0	0	0
MXAN_5993	0	0	0		MXAN_5993	0.0046831	0	0.00650164		MXAN_5993	0	0	0.00887464		MXAN_5993	0	0	0
MXAN_2671	0	0	0		MXAN_2671	0.00392777	0	0.00346191		MXAN_2671	0	0	0.00887464		MXAN_2671	0	0	0
trpA	0	0	0.00597438		trpA	0.00347456	0	0.00402483		trpA	0	0	0.00887464		trpA	0	0	0
MXAN_5869	0	0	0		MXAN_5869	0.00246744	0	0.0022798		MXAN_5869	0	0	0.00887464		MXAN_5869	0	0	0
MXAN_0302	0	0	0.00746797		MXAN_0302	0.0017121	0	0.000619204		MXAN_0302	0	0	0.00887464		MXAN_0302	0	0	0
MXAN_3821	0	0	0		MXAN_3821	0	0	0.000394039		MXAN_3821	0	0	0.00887464		MXAN_3821	0	0	0
lspA(3)	0	0	0.00630629		lspA(3)	0.00241709	0.0301356	0.00315231		lspA(3)	0	0	0.00859731		lspA(3)	0	0	0
MXAN_7179	0	0	0.00215741		MXAN_7179	0.0221063	0.0152451	0.00360264		MXAN_7179	0	0	0.00859731		MXAN_7179	0	0	0
MXAN_4179	0	0	0.0099573		MXAN_4179	0.00498524	0.0102816	0.00444701		MXAN_4179	0	0	0.00859731		MXAN_4179	0	0	0
thiD	0	0	0.00149359		thiD	0.00166175	0.0102816	0.0074023		thiD	0	0	0.00859731		thiD	0	0	0
MXAN_4046	0	0	0.00796584		MXAN_4046	0.00886265	0.0095725	0.00695197		MXAN_4046	0	0	0.00859731		MXAN_4046	0	0	0
pyrG	0	0	0.00381696		pyrG	0.0146536	0.00921796	0.0192516		pyrG	0	0	0.00859731		pyrG	0	0	0
MXAN_1678	0	0	0.00315314		MXAN_1678	0.0138982	0.00779981	0.0395446		MXAN_1678	0	0	0.00859731		MXAN_1678	0	0	0
MXAN_0470	0	0	0.00647224		MXAN_0470	0.0025178	0.00779981	0.00692383		MXAN_0470	0	0	0.00859731		MXAN_0470	0	0	0
MXAN_2075	0	0	0.00763393		MXAN_2075	0.0012589	0.00779981	0.000225165		MXAN_2075	0	0	0.00859731		MXAN_2075	0	0	0
murF	0	0	0.00597438		murF	0.0149054	0	0.00669866		murF	0	0	0.00859731		murF	0	0	0
MXAN_2439	0	0	0.0141062		MXAN_2439	0.0115819	0	0.0236423		MXAN_2439	0	0	0.00859731		MXAN_2439	0	0	0
MXAN_5850	0	0	0.00547651		MXAN_5850	0.00775482	0	0.00523509		MXAN_5850	0	0	0.00859731		MXAN_5850	0	0	0
MXAN_2467	0	0	0.00580842		MXAN_2467	0.0067477	0	0.00543211		MXAN_2467	0	0	0.00859731		MXAN_2467	0	0	0
MXAN_7116	0	0	0.0428164		MXAN_7116	0.00443133	0	0.0193079		MXAN_7116	0	0	0.00859731		MXAN_7116	0	0	0
MXAN_4563	0	0	0.0209103		MXAN_4563	0.00412919	0	0.00447516		MXAN_4563	0	0	0.00859731		MXAN_4563	0	0	0
MXAN_0516	0	0	0.00215741		MXAN_0516	0.00246744	0	0.00180132		MXAN_0516	0	0	0.00859731		MXAN_0516	0	0	0
MXAN_4645	0	0	0.00398292		MXAN_4645	0	0	0.00444701		MXAN_4645	0	0	0.00859731		MXAN_4645	0	0	0
MXAN_0638	0	0	0		MXAN_0638	0	0	0.00270198		MXAN_0638	0	0	0.00859731		MXAN_0638	0	0	0
MXAN_2965	0	0	0.0051446		MXAN_2965	0	0	0.00177317		MXAN_2965	0	0	0.00859731		MXAN_2965	0	0	0
MXAN_0633	0	0	0.0117828		MXAN_0633	0	0	0.00090066		MXAN_0633	0	0	0.00859731		MXAN_0633	0	0	0
MXAN_4663	0	0	0		MXAN_4663	0	0	0.000872515		MXAN_4663	0	0	0.00859731		MXAN_4663	0	0	0
MXAN_0133	0	0.233464	0.0302038		MXAN_0133	0.0746779	0	0.360123		MXAN_0133	0	0.787402	0.00831998		MXAN_0133	0	0	0
MXAN_7310	0	0	0.0112849		MXAN_7310	0.00986977	0.0202086	0.0256125		MXAN_7310	0.218087	0	0.00831998		MXAN_7310	0	0	0
MXAN_1471	0	0	0.00497865		MXAN_1471	0.00755339	0.0102816	0.00667052		MXAN_1471	0.0556819	0	0.00831998		MXAN_1471	0	0	0
mac1	0	0	0.0326931		mac1	0.0207467	0.00886343	0.0272731		mac1	0.0464016	0	0.00831998		mac1	0	0	0
MXAN_5984	0	0	0		MXAN_5984	0.0659663	0.0538896	0.0025894		MXAN_5984	0	0	0.00831998		MXAN_5984	0	0	0
MXAN_4964	0	0	0.00199146		MXAN_4964	0.0359038	0.0443171	0.00306787		MXAN_4964	0	0	0.00831998		MXAN_4964	0	0	0
MXAN_7503	0	0	0.010953		MXAN_7503	0	0.0276539	0.00430628		MXAN_7503	0	0	0.00831998		MXAN_7503	0	0	0
MXAN_4065	0	0	0.0114509		MXAN_4065	0.00871158	0.0265903	0.00171688		MXAN_4065	0	0	0.00831998		MXAN_4065	0	0	0
MXAN_7500	0	0	0.0307017		MXAN_7500	0	0.0187905	0.000337748		MXAN_7500	0	0	0.00831998		MXAN_7500	0	0	0
MXAN_6610	0	0	0.00647224		MXAN_6610	0.0175742	0.0155996	0.00484105		MXAN_6610	0	0	0.00831998		MXAN_6610	0	0	0
MXAN_5738	0	0	0.0242294		MXAN_5738	0.0123876	0.0152451	0.0268509		MXAN_5738	0	0	0.00831998		MXAN_5738	0	0	0
MXAN_6571	0	0	0.0229018		MXAN_6571	0.00569022	0.0131179	0.00441886		MXAN_6571	0	0	0.00831998		MXAN_6571	0	0	0
MXAN_1408	0	0	0.0160976		MXAN_1408	0.0037767	0.00779981	0.043682		MXAN_1408	0	0	0.00831998		MXAN_1408	0	0	0
MXAN_0921	0	0	0.0114509		MXAN_0921	0.005942	0.00531806	0.00602317		MXAN_0921	0	0	0.00831998		MXAN_0921	0	0	0
MXAN_0029	0	0	0.0310336		MXAN_0029	0.0147039	0.00354537	0.0221225		MXAN_0029	0	0	0.00831998		MXAN_0029	0	0	0
MXAN_0401	0	0	0.00763393		MXAN_0401	0.0175742	0	0.0025894		MXAN_0401	0	0	0.00831998		MXAN_0401	0	0	0
MXAN_4461	0	0	0.0142721		MXAN_4461	0.0118337	0	0.0142698		MXAN_4461	0	0	0.00831998		MXAN_4461	0	0	0
MXAN_3676	0	0	0.0142721		MXAN_3676	0.00896336	0	0.034591		MXAN_3676	0	0	0.00831998		MXAN_3676	0	0	0
MXAN_0120	0	0	0.0192508		MXAN_0120	0.00438097	0	0.000872515		MXAN_0120	0	0	0.00831998		MXAN_0120	0	0	0
trpS	0	0	0.00315314		trpS	0.00367599	0	0.00607946		trpS	0	0	0.00831998		trpS	0	0	0
MXAN_0551	0	0	0		MXAN_0551	0.00201424	0	0.000337748		MXAN_0551	0	0	0.00831998		MXAN_0551	0	0	0
MXAN_2146	0	0	0		MXAN_2146	0	0	0.0199271		MXAN_2146	0	0	0.00831998		MXAN_2146	0	0	0
MXAN_2640	0	0	0.00381696		MXAN_2640	0	0	0.00346191		MXAN_2640	0	0	0.00831998		MXAN_2640	0	0	0
MXAN_4260	0	0	0.00381696		MXAN_4260	0	0	0.00340562		MXAN_4260	0	0	0.00831998		MXAN_4260	0	0	0
MXAN_2756	0	0	0.00614033		MXAN_2756	0	0	0.000422185		MXAN_2756	0	0	0.00831998		MXAN_2756	0	0	0
MXAN_5611	0	0	0		MXAN_5611	0.0042299	0	0.0124685		MXAN_5611	0.269129	0	0.00804264		MXAN_5611	0	0	0
MXAN_7296	0	0	0.00746797		MXAN_7296	0	0	0.000844369		MXAN_7296	0.269129	0	0.00804264		MXAN_7296	0	0	0
otsAB	0	0	0.00414887		otsAB	0.0172721	0.0301356	0.00270198		otsAB	0	0	0.00804264		otsAB	0	0	0
MXAN_2396	0	0	0.0119488		MXAN_2396	0.00231637	0.028363	0.00126655		MXAN_2396	0	0	0.00804264		MXAN_2396	0	0	0
nusB	0	0	0.00730202		nusB	0.00840945	0.0255267	0.0114834		nusB	0	0	0.00804264		nusB	0	0	0
MXAN_0449	0	0	0.0102892		MXAN_0449	0.0120854	0.0223358	0.00892217		MXAN_0449	0	0	0.00804264		MXAN_0449	0	0	0
MXAN_4697	0	0	0.00265528		MXAN_4697	0.0156103	0.019145	0.00695197		MXAN_4697	0	0	0.00804264		MXAN_4697	0	0	0
MXAN_3284	0	0	0.0099573		MXAN_3284	0.0115819	0.0141815	0.00126655		MXAN_3284	0	0	0.00804264		MXAN_3284	0	0	0
MXAN_0893	0	0	0		MXAN_0893	0.00931585	0.0141815	0.00213907		MXAN_0893	0	0	0.00804264		MXAN_0893	0	0	0
MXAN_4795	0	0	0.0436462		MXAN_4795	0.0145025	0.0120543	0.00824667		MXAN_4795	0	0	0.00804264		MXAN_4795	0	0	0
mmsA	0	0	0.0160976		mmsA	0.0122869	0.0102816	0.000844369		mmsA	0	0	0.00804264		mmsA	0	0	0
MXAN_6564	0	0	0.0132764		MXAN_6564	0.0139486	0.0095725	0.0204056		MXAN_6564	0	0	0.00804264		MXAN_6564	0	0	0
pssA(1)	0	0	0.0159317		pssA(1)	0.0108265	0.0095725	0.0173659		pssA(1)	0	0	0.00804264		pssA(1)	0	0	0
rtcA(1)	0	0	0.0141062		rtcA(1)	0.00710019	0.00744528	0.0093162		rtcA(1)	0	0	0.00804264		rtcA(1)	0	0	0
tolB(2)	0	0	0.00165955		tolB(2)	0.00287029	0.00602713	0.0161837		tolB(2)	0	0	0.00804264		tolB(2)	0	0	0
dbsD	0	0	0.0033191		dbsD	0.00397812	0.00496352	0.00455959		dbsD	0	0	0.00804264		dbsD	0	0	0
MXAN_1381	0	0	0.00298719		MXAN_1381	0.00604272	0.00389991	0.00135099		MXAN_1381	0	0	0.00804264		MXAN_1381	0	0	0
MXAN_2438	0	0.841471	0.0487908		MXAN_2438	0.0343428	0	0.0707863		MXAN_2438	0	0	0.00804264		MXAN_2438	0	0	0
MXAN_2036	0	0	0.010953		MXAN_2036	0.025178	0	0.0352946		MXAN_2036	0	0	0.00804264		MXAN_2036	0	0	0
MXAN_6494	0	0	0.00779988		MXAN_6494	0.0113804	0	0.0518443		MXAN_6494	0	0	0.00804264		MXAN_6494	0	0	0
MXAN_6974	0	0	0.00365101		MXAN_6974	0.00851016	0	0.000844369		MXAN_6974	0	0	0.00804264		MXAN_6974	0	0	0
cheB3	0	0	0.0134424		cheB3	0.00604272	0	0.00554469		cheB3	0	0	0.00804264		cheB3	0	0	0
carF	0	0	0.0175912		carF	0.00478382	0	0.0153112		carF	0	0	0.00804264		carF	0	0	0
MXAN_5046	0	0	0.022238		MXAN_5046	0.0042299	0	0.00582615		MXAN_5046	0	0	0.00804264		MXAN_5046	0	0	0
MXAN_2591	0	0.876686	0.00398292		MXAN_2591	0.00226602	0	0.00540396		MXAN_2591	0	0	0.00804264		MXAN_2591	0	0	0
MXAN_3037	0	0	0.00199146		MXAN_3037	0.00226602	0	0.000844369		MXAN_3037	0	0	0.00804264		MXAN_3037	0	0	0
ansA	0	0	0.00414887		ansA	0.00120854	0	0.00785263		ansA	0	0	0.00804264		ansA	0	0	0
MXAN_3038	0	0	0.00365101		MXAN_3038	0	0	0.0147765		MXAN_3038	0	0	0.00804264		MXAN_3038	0	0	0
MXAN_7395	0	0	0.025723		MXAN_7395	0	0	0.00903475		MXAN_7395	0	0	0.00804264		MXAN_7395	0	0	0
MXAN_5991	0	0	0.00381696		MXAN_5991	0	0	0.000844369		MXAN_5991	0	0	0.00804264		MXAN_5991	0	0	0
MXAN_0247	0	0	0		MXAN_0247	0	0	0.000422185		MXAN_0247	0	0	0.00804264		MXAN_0247	0	0	0
MXAN_5318	0	0	0.0116168		MXAN_5318	0.00901372	0	0.0141573		MXAN_5318	0.0974433	0	0.00776531		MXAN_5318	0	0	0
purA	0	0	0.0104552		purA	0.0103733	0	0.0498459		purA	0.0649622	0	0.00776531		purA	0	0	0
MXAN_5035	0	0	0.0126126		MXAN_5035	0.000906407	0.0230449	0.00500992		MXAN_5035	0.060322	0	0.00776531		MXAN_5035	0	0	0
frzF	0	0	0.00232337		frzF	0.00402848	0.00425444	0.00242052		frzF	0.0464016	0	0.00776531		frzF	0	0	0
MXAN_5023	0	0	0.0142721		MXAN_5023	0.00050356	0	0.00430628		MXAN_5023	0.0324811	0	0.00776531		MXAN_5023	0	0	0
MXAN_1344	0	0.435408	0.0116168		MXAN_1344	0.0790085	0.0833162	0.111232		MXAN_1344	0	0	0.00776531		MXAN_1344	0	0	0
MXAN_7037	0	0	0.0537694		MXAN_7037	0.070448	0.0460898	0.0643691		MXAN_7037	0	0	0.00776531		MXAN_7037	0	0	0
MXAN_7505	0	0	0.0018255		MXAN_7505	0.00876194	0.0404172	0.0067831		MXAN_7505	0	0	0.00776531		MXAN_7505	0	0	0
MXAN_4738	0	0	0.0180891		MXAN_4738	0.0140997	0.0365173	0.00971024		MXAN_4738	0	0	0.00776531		MXAN_4738	0	0	0
MXAN_0421	0	0	0.0194167		MXAN_0421	0.00569022	0.0350992	0.0101887		MXAN_0421	0	0	0.00776531		MXAN_0421	0	0	0
MXAN_7436	0	0	0.0124466		MXAN_7436	0.011028	0.028363	0.0123278		MXAN_7436	0	0	0.00776531		MXAN_7436	0	0	0
MXAN_4190	0	0	0.0033191		MXAN_4190	0.00725126	0.0148906	0.00785263		MXAN_4190	0	0	0.00776531		MXAN_4190	0	0	0
MXAN_3131	0	0.435408	0.00779988		MXAN_3131	0.00226602	0.0138269	0.00453145		MXAN_3131	0	0	0.00776531		MXAN_3131	0	0	0
MXAN_6461	0	0	0.00381696		MXAN_6461	0.0288036	0.0134724	0.00323675		MXAN_6461	0	0	0.00776531		MXAN_6461	0	0	0
maiA	0	0	0.0151019		maiA	0.0196892	0.0134724	0.0238956		maiA	0	0	0.00776531		maiA	0	0	0
MXAN_7346	0	0	0.00564247		MXAN_7346	0.00221566	0.0134724	0.0064172		MXAN_7346	0	0	0.00776531		MXAN_7346	0	0	0
pyrC	0	0	0.00232337		pyrC	0.00755339	0.0116997	0.00819038		pyrC	0	0	0.00776531		pyrC	0	0	0
dcp	0	0	0.00398292		dcp	0.0153082	0.00992704	0.0464966		dcp	0	0	0.00776531		dcp	0	0	0
MXAN_4706	0	0	0.00132764		MXAN_4706	0.00760375	0.00921796	0.00323675		MXAN_4706	0	0	0.00776531		MXAN_4706	0	0	0
pyrD	0	0	0.00896157		pyrD	0.0116826	0.00709074	0.00329304		pyrD	0	0	0.00776531		pyrD	0	0	0
gpmI	0	0	0.00531056		gpmI	0.00473346	0.00496352	0.0123841		gpmI	0	0	0.00776531		gpmI	0	0	0
MXAN_5585	0	0	0.00912752		MXAN_5585	0.00589165	0.00319083	0.00596687		MXAN_5585	0	0	0.00776531		MXAN_5585	0	0	0
MXAN_2702	0	0	0.0134424		MXAN_2702	0.0223077	0	0.0199271		MXAN_2702	0	0	0.00776531		MXAN_2702	0	0	0
MXAN_3475	0	0	0.0107871		MXAN_3475	0.0124379	0	0.00971024		MXAN_3475	0	0	0.00776531		MXAN_3475	0	0	0
MXAN_4567	0	0	0.00365101		MXAN_4567	0.0122869	0	0.0199834		MXAN_4567	0	0	0.00776531		MXAN_4567	0	0	0
MXAN_1062	0	0	0.00580842		MXAN_1062	0.00669734	0	0.00121026		MXAN_1062	0	0	0.00776531		MXAN_1062	0	0	0
MXAN_0445	0	0	0.00647224		MXAN_0445	0.00458239	0	0.000816223		MXAN_0445	0	0	0.00776531		MXAN_0445	0	0	0
MXAN_5885	0	0	0.0018255		MXAN_5885	0.00438097	0	0.00602317		MXAN_5885	0	0	0.00776531		MXAN_5885	0	0	0
MXAN_6032	0	0	0.00265528		MXAN_6032	0.00307171	0	0.00602317		MXAN_6032	0	0	0.00776531		MXAN_6032	0	0	0
MXAN_1067	0	0	0.00381696		MXAN_1067	0.00302136	0	0.00619204		MXAN_1067	0	0	0.00776531		MXAN_1067	0	0	0
MXAN_2693	0	0	0.00199146		MXAN_2693	0.00236673	0	0.002899		MXAN_2693	0	0	0.00776531		MXAN_2693	0	0	0
MXAN_7170	0	0	0.107871		MXAN_7170	0.00221566	0	0.00281456		MXAN_7170	0	0	0.00776531		MXAN_7170	0	0	0
MXAN_4998	0	0	0.00365101		MXAN_4998	0	0	0.00478476		MXAN_4998	0	0	0.00776531		MXAN_4998	0	0	0
MXAN_4323	0	0	0.0248932		MXAN_4323	0	0	0.000337748		MXAN_4323	0	0	0.00776531		MXAN_4323	0	0	0
gid	0	0	0.0190848		gid	0.00805695	0.0386445	0.00700826		gid	0	0.590551	0.00748798		gid	0	0	0
MXAN_6576	0	0	0.00381696		MXAN_6576	0.00443133	0.00921796	0.012553		MXAN_6576	0.0974433	0	0.00748798		MXAN_6576	0	0	0
MXAN_0289	0	0.095429	0.0127785		MXAN_0289	0.0200417	0.0340356	0.0139039		MXAN_0289	0.0324811	0	0.00748798		MXAN_0289	0	0	0
MXAN_3229	0	0	0.00232337		MXAN_3229	0.0792099	0.150324	0.000168874		MXAN_3229	0	0	0.00748798		MXAN_3229	0	0	0
MXAN_2925	0	0	0.0180891		MXAN_2925	0.0239191	0.0333265	0.0156208		MXAN_2925	0	0	0.00748798		MXAN_2925	0	0	0
MXAN_6822	0	0.172598	0.00298719		MXAN_6822	0.0190346	0.0308447	0.0090066		MXAN_6822	0	0	0.00748798		MXAN_6822	0	0	0
MXAN_7476	0	0	0.0177572		MXAN_7476	0.0283504	0.0276539	0.00582615		MXAN_7476	0	0	0.00748798		MXAN_7476	0	0	0
MXAN_3128	0	0	0.0212422		MXAN_3128	0.0121861	0.0248176	0.0134255		MXAN_3128	0	0	0.00748798		MXAN_3128	0	0	0
MXAN_0190	0	0	0.0283783		MXAN_0190	0.00810731	0.0248176	0.00394039		MXAN_0190	0	0	0.00748798		MXAN_0190	0	0	0
MXAN_5039	0	0	0.0104552		MXAN_5039	0.091245	0.0241085	0.0977779		MXAN_5039	0	0	0.00748798		MXAN_5039	0	0	0
fusA(1)	0	0	0.00282123		fusA(1)	0.00906407	0.0209177	0.013144		fusA(1)	0	0	0.00748798		fusA(1)	0	0	0
modB	0	0	0		modB	0	0.0131179	0.00154801		modB	0	0	0.00748798		modB	0	0	0
aglZ	0	0.0510838	0.00879561		aglZ	0.00997048	0.00992704	0.0157334		aglZ	0	0	0.00748798		aglZ	0	0	0
MXAN_3750	0	0	0.00497865		MXAN_3750	0.00438097	0.00886343	0.00154801		MXAN_3750	0	0	0.00748798		MXAN_3750	0	0	0
MXAN_3219	0	0	0.00282123		MXAN_3219	0.00569022	0.00709074	0.0153112		MXAN_3219	0	0	0.00748798		MXAN_3219	0	0	0
MXAN_5847	0	0	0.00531056		MXAN_5847	0.00624414	0.00567259	0.00323675		MXAN_5847	0	0	0.00748798		MXAN_5847	0	0	0
MXAN_0543	0	0.437582	0.00199146		MXAN_0543	0.0122365	0.00460898	0.0760495		MXAN_0543	0	0	0.00748798		MXAN_0543	0	0	0
MXAN_1163	0	0	0.0154338		MXAN_1163	0.00453204	0.00389991	0.00602317		MXAN_1163	0	0	0.00748798		MXAN_1163	0	0	0
MXAN_6484	0	0	0.0804882		MXAN_6484	0.0264369	0	0.00897846		MXAN_6484	0	0	0.00748798		MXAN_6484	0	0	0
MXAN_2620	0	0	0.00348505		MXAN_2620	0.0160636	0	0.00233609		MXAN_2620	0	0	0.00748798		MXAN_2620	0	0	0
MXAN_6889	0	0	0.00381696		MXAN_6889	0.00785553	0	0.0122152		MXAN_6889	0	0	0.00748798		MXAN_6889	0	0	0
MXAN_1398	0	0.40954	0.00365101		MXAN_1398	0.00639521	0	0.00424999		MXAN_1398	0	0	0.00748798		MXAN_1398	0	0	0
MXAN_4304	0	0	0.00282123		MXAN_4304	0.00553916	0	0.0106953		MXAN_4304	0	0	0.00748798		MXAN_4304	0	0	0
ribBA	0	0	0.00962539		ribBA	0.00337385	0	0.0192235		ribBA	0	0	0.00748798		ribBA	0	0	0
MXAN_2872	0	0	0.0099573		MXAN_2872	0.00327314	0	0.00498178		MXAN_2872	0	0	0.00748798		MXAN_2872	0	0	0
MXAN_6863	0	0	0.00381696		MXAN_6863	0.002971	0	0.00424999		MXAN_6863	0	0	0.00748798		MXAN_6863	0	0	0
MXAN_4242	0	0	0.0353484		MXAN_4242	0	0	0.00472847		MXAN_4242	0	0	0.00748798		MXAN_4242	0	0	0
MXAN_2506	0	0	0		MXAN_2506	0	0	0.00230794		MXAN_2506	0	0	0.00748798		MXAN_2506	0	0	0
MXAN_6975	0	0	0.00697011		MXAN_6975	0	0	0.00230794		MXAN_6975	0	0	0.00748798		MXAN_6975	0	0	0
MXAN_0583	0	0	0		MXAN_0583	0	0	0.00194205		MXAN_0583	0	0	0.00748798		MXAN_0583	0	0	0
MXAN_1242	0	0	0.00099573		MXAN_1242	0	0	0.00157616		MXAN_1242	0	0	0.00748798		MXAN_1242	0	0	0
MXAN_3490	0	0	0.0137743		MXAN_3490	0	0	0.000759932		MXAN_3490	0	0	0.00748798		MXAN_3490	0	0	0
MXAN_6541	0	0	0.0051446		MXAN_6541	0.00574058	0	0.00101324		MXAN_6541	0	0.905512	0.00721065		MXAN_6541	0	0	0
MXAN_4358	0	0	0.00481269		MXAN_4358	0.00569022	0.0177269	0.00529138		MXAN_4358	0.0928031	0	0.00721065		MXAN_4358	0	0	0
MXAN_3768	0	0.207379	0.0101233		MXAN_3768	0.0151571	0.0067362	0.00720528		MXAN_3768	0.0742425	0	0.00721065		MXAN_3768	0	0	0
MXAN_1578	0	0.208466	0.0325272		MXAN_1578	0.00110783	0.0067362	0.124601		MXAN_1578	0.0742425	0	0.00721065		MXAN_1578	0	0	0
MXAN_0775	0	0	0.0101233		MXAN_0775	0.00216531	0	0.00360264		MXAN_0775	0.0742425	0	0.00721065		MXAN_0775	0	0	0
miaB	0	0	0.00597438		miaB	0.00710019	0	0.0112301		miaB	0.060322	0	0.00721065		miaB	0	0	0
MXAN_1161	0	0	0.0132764		MXAN_1161	0.0283001	0.122315	0.0137914		MXAN_1161	0	0	0.00721065		MXAN_1161	0	0	0
csgA	0	0	0		csgA	0.0144522	0.0889888	0.00185761		csgA	0	0	0.00721065		csgA	0	0	0
MXAN_5057	0	0.0939073	0.0151019		MXAN_5057	0.0449175	0.0641712	0.0307913		MXAN_5057	0	0	0.00721065		MXAN_5057	0	0	0
MXAN_5093	0	0	0.0572545		MXAN_5093	0.0229623	0.0514079	0.00416555		MXAN_5093	0	0	0.00721065		MXAN_5093	0	0	0
glmU	0	0	0.0051446		glmU	0.0368102	0.0489261	0.00852813		glmU	0	0	0.00721065		glmU	0	0	0
cmk	0	0	0.00697011		cmk	0.00412919	0.0251721	0.010048		cmk	0	0	0.00721065		cmk	0	0	0
MXAN_4673	0	0	0.0165955		MXAN_4673	0.0113804	0.0233994	0.0425281		MXAN_4673	0	0	0.00721065		MXAN_4673	0	0	0
MXAN_3292	0	0	0.0545992		MXAN_3292	0.00322278	0.0198541	0.0297781		MXAN_3292	0	0	0.00721065		MXAN_3292	0	0	0
MXAN_5030	0	0	0.0202465		MXAN_5030	0.00886265	0.0109906	0.00244867		MXAN_5030	0	0	0.00721065		MXAN_5030	0	0	0
MXAN_4525	0	0	0.00215741		MXAN_4525	0.00689877	0.0106361	0.00655793		MXAN_4525	0	0	0.00721065		MXAN_4525	0	0	0
MXAN_5363	0	0	0.00365101		MXAN_5363	0	0.00886343	0.00332118		MXAN_5363	0	0	0.00721065		MXAN_5363	0	0	0
MXAN_3380	0	0	0.00348505		MXAN_3380	0	0.00850889	0.000253311		MXAN_3380	0	0	0.00721065		MXAN_3380	0	0	0
MXAN_1512	0	0	0.00365101		MXAN_1512	0.00538809	0.0067362	0.00582615		MXAN_1512	0	0	0.00721065		MXAN_1512	0	0	0
MXAN_2975	0	0	0.0018255		MXAN_2975	0.00327314	0.0067362	0.00208278		MXAN_2975	0	0	0.00721065		MXAN_2975	0	0	0
MXAN_3251	0	0	0.00547651		MXAN_3251	0.00322278	0.0067362	0.0090066		MXAN_3251	0	0	0.00721065		MXAN_3251	0	0	0
MXAN_2537	0	0	0.00365101		MXAN_2537	0.00856051	0.00531806	0.00430628		MXAN_2537	0	0	0.00721065		MXAN_2537	0	0	0
hutU	0	0	0.0160976		hutU	0.0080066	0.00460898	0.0229668		hutU	0	0	0.00721065		hutU	0	0	0
MXAN_0737	0	0	0.00248932		MXAN_0737	0.00634485	0.00460898	0.00222351		MXAN_0737	0	0	0.00721065		MXAN_0737	0	0	0
MXAN_0217	0	0	0.0106211		MXAN_0217	0.0165168	0	0.0280331		MXAN_0217	0	0	0.00721065		MXAN_0217	0	0	0
MXAN_0256	0	0	0.0388335		MXAN_0256	0.00654628	0	0.0216721		MXAN_0256	0	0	0.00721065		MXAN_0256	0	0	0
MXAN_7000	0	0	0.0167615		MXAN_7000	0.00654628	0	0.0126374		MXAN_7000	0	0	0.00721065		MXAN_7000	0	0	0
mraW	0	0	0.00979134		mraW	0.00579094	0	0.00332118		mraW	0	0	0.00721065		mraW	0	0	0
hflC	0	0	0.00945943		hflC	0.00558951	0	0.00864071		hflC	0	0	0.00721065		hflC	0	0	0
MXAN_7497	0	0.0762997	0.00614033		MXAN_7497	0.00523702	0	0.01275		MXAN_7497	0	0	0.00721065		MXAN_7497	0	0	0
MXAN_1181	0	0	0.00431483		MXAN_1181	0.00438097	0	0.00537582		MXAN_1181	0	0	0.00721065		MXAN_1181	0	0	0
ribF	0	0	0.00365101		ribF	0.00428026	0	0.00529138		ribF	0	0	0.00721065		ribF	0	0	0
MXAN_5639	0	0	0.00680415		MXAN_5639	0.00387741	0	0.0112583		MXAN_5639	0	0	0.00721065		MXAN_5639	0	0	0
MXAN_2200	0	0	0.00116168		MXAN_2200	0.00287029	0	0.00329304		MXAN_2200	0	0	0.00721065		MXAN_2200	0	0	0
ribD	0	0	0.00647224		ribD	0.00216531	0	0.0074023		ribD	0	0	0.00721065		ribD	0	0	0
MXAN_5119	0	0	0.00547651		MXAN_5119	0.00216531	0	0.00244867		MXAN_5119	0	0	0.00721065		MXAN_5119	0	0	0
MXAN_6402	0	0	0		MXAN_6402	0.00206459	0	0		MXAN_6402	0	0	0.00721065		MXAN_6402	0	0	0
MXAN_0978	0	0	0.0929348		MXAN_0978	0.0017121	0	0.00135099		MXAN_0978	0	0	0.00721065		MXAN_0978	0	0	0
MXAN_2465	0	0	0.0179231		MXAN_2465	0.00140997	0	0.022038		MXAN_2465	0	0	0.00721065		MXAN_2465	0	0	0
rnz	0	0	0.00614033		rnz	0.00140997	0	0.00506621		rnz	0	0	0.00721065		rnz	0	0	0
MXAN_0898	0	0	0.00365101		MXAN_0898	0.00140997	0	0.00177317		MXAN_0898	0	0	0.00721065		MXAN_0898	0	0	0
MXAN_4061	0	0	0.00365101		MXAN_4061	0.00140997	0	0.00149172		MXAN_4061	0	0	0.00721065		MXAN_4061	0	0	0
MXAN_5026	0	0	0.011119		MXAN_5026	0.000856051	0	0.00486919		MXAN_5026	0	0	0.00721065		MXAN_5026	0	0	0
MXAN_4022	0	0	0.00066382		MXAN_4022	0.000755339	0	0.00151986		MXAN_4022	0	0	0.00721065		MXAN_4022	0	0	0
MXAN_3801	0	0	0.0033191		MXAN_3801	0	0	0.00374337		MXAN_3801	0	0	0.00721065		MXAN_3801	0	0	0
MXAN_2784	0	0	0.00547651		MXAN_2784	0	0	0.0019139		MXAN_2784	0	0	0.00721065		MXAN_2784	0	0	0
MXAN_0517	0	0	0.0033191		MXAN_0517	0	0	0.00149172		MXAN_0517	0	0	0.00721065		MXAN_0517	0	0	0
MXAN_5884	0	0	0.0018255		MXAN_5884	0	0	0.00115397		MXAN_5884	0	0	0.00721065		MXAN_5884	0	0	0
MXAN_5205	0	0	0.0033191		MXAN_5205	0	0	0.000759932		MXAN_5205	0	0	0.00721065		MXAN_5205	0	0	0
MXAN_1193	0	0	0.00713606		MXAN_1193	0.00992013	0.0095725	0.00737416		MXAN_1193	0.0232008	0	0.00693331		MXAN_1193	0	0	0
MXAN_0263	0	0	0.0481269		MXAN_0263	0.0147543	0.0677166	0.00920362		MXAN_0263	0	0	0.00693331		MXAN_0263	0	0	0
lpxC	0	0	0.0117828		lpxC	0.0319257	0.0514079	0.0314387		lpxC	0	0	0.00693331		lpxC	0	0	0
MXAN_5912	0	0	0.00580842		MXAN_5912	0.016416	0.0506988	0.00410926		MXAN_5912	0	0	0.00693331		MXAN_5912	0	0	0
glpX	0	0	0.00929348		glpX	0.0243219	0.0499897	0.0200678		glpX	0	0	0.00693331		glpX	0	0	0
MXAN_5716	0	0	0.0152679		MXAN_5716	0.0238184	0.0489261	0.0423029		MXAN_5716	0	0	0.00693331		MXAN_5716	0	0	0
MXAN_0678	0	0	0.0114509		MXAN_0678	0.00538809	0.0333265	0.00261754		MXAN_0678	0	0	0.00693331		MXAN_0678	0	0	0
MXAN_3129	0	0	0.0718585		MXAN_3129	0.0307675	0.0294266	0.0989038		MXAN_3129	0	0	0.00693331		MXAN_3129	0	0	0
MXAN_6089	0	0.72626	0.051778		MXAN_6089	0.0409394	0.0226904	0.180526		MXAN_6089	0	0	0.00693331		MXAN_6089	0	0	0
MXAN_1157	0	0	0.00315314		MXAN_1157	0.0110783	0.0226904	0		MXAN_1157	0	0	0.00693331		MXAN_1157	0	0	0
MXAN_1149	0	0	0.0177572		MXAN_1149	0.0179771	0.0170178	0.00683939		MXAN_1149	0	0	0.00693331		MXAN_1149	0	0	0
MXAN_5196	0	0	0.00215741		MXAN_5196	0.0067477	0.0155996	0.00379966		MXAN_5196	0	0	0.00693331		MXAN_5196	0	0	0
MXAN_1511	0	0	0.0233997		MXAN_1511	0.0233148	0.0131179	0.0146076		MXAN_1511	0	0	0.00693331		MXAN_1511	0	0	0
MXAN_3282	0	0	0.0018255		MXAN_3282	0.00518666	0.0127633	0.00416555		MXAN_3282	0	0	0.00693331		MXAN_3282	0	0	0
MXAN_3716	0	0	0.0033191		MXAN_3716	0.00986977	0.0120543	0.0032086		MXAN_3716	0	0	0.00693331		MXAN_3716	0	0	0
MXAN_3445	0	0	0.022072		MXAN_3445	0.00337385	0.0102816	0.0351539		MXAN_3445	0	0	0.00693331		MXAN_3445	0	0	0
carD	0	0	0.0117828		carD	0.0248255	0.00850889	0.0241208		carD	0	0	0.00693331		carD	0	0	0
MXAN_1057	0	0	0.00232337		MXAN_1057	0	0.00850889	0.000731786		MXAN_1057	0	0	0.00693331		MXAN_1057	0	0	0
MXAN_5704	0	0	0.00282123		MXAN_5704	0.000856051	0.00531806	0.0025894		MXAN_5704	0	0	0.00693331		MXAN_5704	0	0	0
MXAN_6665	0	0	0.00713606		MXAN_6665	0.0135458	0	0.0328741		MXAN_6665	0	0	0.00693331		MXAN_6665	0	0	0
MXAN_1953	0	0	0.00315314		MXAN_1953	0.0110783	0	0.00424999		MXAN_1953	0	0	0.00693331		MXAN_1953	0	0	0
MXAN_1099	0	0	0.00697011		MXAN_1099	0.00956763	0	0.00315231		MXAN_1099	0	0	0.00693331		MXAN_1099	0	0	0
MXAN_3111	0	0	0.0131104		MXAN_3111	0.00513631	0	0.00540396		MXAN_3111	0	0	0.00693331		MXAN_3111	0	0	0
MXAN_0606	0	0.134774	0.00298719		MXAN_0606	0.0042299	0	0.00574171		MXAN_0606	0	0	0.00693331		MXAN_0606	0	0	0
trpB	0	0	0.00979134		trpB	0.00417955	0	0.00453145		trpB	0	0	0.00693331		trpB	0	0	0
MXAN_4401	0	0	0.00348505		MXAN_4401	0.00417955	0	0.00146357		MXAN_4401	0	0	0.00693331		MXAN_4401	0	0	0
MXAN_0708	0	0	0.00647224		MXAN_0708	0.00367599	0	0.000703641		MXAN_0708	0	0	0.00693331		MXAN_0708	0	0	0
MXAN_0140	0	0	0.0099573		MXAN_0140	0.00337385	0	0.00841554		MXAN_0140	0	0	0.00693331		MXAN_0140	0	0	0
MXAN_0636	0	0	0.00879561		MXAN_0636	0.00307171	0	0.00667052		MXAN_0636	0	0	0.00693331		MXAN_0636	0	0	0
MXAN_6584	0	0	0.00497865		MXAN_6584	0.0025178	0	0.000731786		MXAN_6584	0	0	0.00693331		MXAN_6584	0	0	0
MXAN_5746	0	0	0.0018255		MXAN_5746	0.00211495	0	0.000928806		MXAN_5746	0	0	0.00693331		MXAN_5746	0	0	0
MXAN_6583	0	0	0.00165955		MXAN_6583	0.00196388	0	0		MXAN_6583	0	0	0.00693331		MXAN_6583	0	0	0
MXAN_0975	0	0	0.0117828		MXAN_0975	0.00135961	0	0.000985097		MXAN_0975	0	0	0.00693331		MXAN_0975	0	0	0
MXAN_5385	0	0	0.0033191		MXAN_5385	0	0	0.00216721		MXAN_5385	0	0	0.00693331		MXAN_5385	0	0	0
MXAN_6250	0	0	0.0033191		MXAN_6250	0	0	0.00216721		MXAN_6250	0	0	0.00693331		MXAN_6250	0	0	0
MXAN_3908	0	0	0.0051446		MXAN_3908	0	0	0.00109768		MXAN_3908	0	0	0.00693331		MXAN_3908	0	0	0
MXAN_7317	0	0	0.00165955		MXAN_7317	0.0235666	0.0485716	0.00956952		MXAN_7317	0	1.22047	0.00665598		MXAN_7317	0	0	0
MXAN_4003	0	0	0.00232337		MXAN_4003	0.00397812	0	0.00703641		MXAN_4003	0.088163	0	0.00665598		MXAN_4003	0	0	0
MXAN_2716	0	0	0.0126126		MXAN_2716	0.105798	0.111679	0.00349006		MXAN_2716	0	0	0.00665598		MXAN_2716	0	0	0
MXAN_5913	0	0	0.00680415		MXAN_5913	0.047536	0.0350992	0.0269354		MXAN_5913	0	0	0.00665598		MXAN_5913	0	0	0
MXAN_3740	0	0	0.00630629		MXAN_3740	0.0182289	0.0223358	0.00140728		MXAN_3740	0	0	0.00665598		MXAN_3740	0	0	0
MXAN_2021	0	0	0		MXAN_2021	0	0.0223358	0.000703641		MXAN_2021	0	0	0.00665598		MXAN_2021	0	0	0
MXAN_5952	0	0	0.00929348		MXAN_5952	0.0357527	0.0219813	0.0451737		MXAN_5952	0	0	0.00665598		MXAN_5952	0	0	0
MXAN_3753	0	0	0.0112849		MXAN_3753	0.0119847	0.0163087	0.00540396		MXAN_3753	0	0	0.00665598		MXAN_3753	0	0	0
MXAN_4171	0	0	0.0033191		MXAN_4171	0.0117833	0.0163087	0.00391224		MXAN_4171	0	0	0.00665598		MXAN_4171	0	0	0
MXAN_4523	0	0	0.00414887		MXAN_4523	0.0109272	0.0124088	0.00467218		MXAN_4523	0	0	0.00665598		MXAN_4523	0	0	0
MXAN_7062	0	0	0		MXAN_7062	0.01556	0.0120543	0.00700826		MXAN_7062	0	0	0.00665598		MXAN_7062	0	0	0
rho(1)	0	0	0.0233997		rho(1)	0.00886265	0.0120543	0.0080778		rho(1)	0	0	0.00665598		rho(1)	0	0	0
MXAN_3723	0	0	0.0214082		MXAN_3723	0.00574058	0.0116997	0.0169718		MXAN_3723	0	0	0.00665598		MXAN_3723	0	0	0
MXAN_2324	0	0	0		MXAN_2324	0.00382705	0.0116997	0.00104139		MXAN_2324	0	0	0.00665598		MXAN_2324	0	0	0
MXAN_6369	0	0	0.0033191		MXAN_6369	0.00191353	0.0116997	0.000703641		MXAN_6369	0	0	0.00665598		MXAN_6369	0	0	0
MXAN_4432	0	0	0.0144381		MXAN_4432	0.0143515	0.00815435	0.00368708		MXAN_4432	0	0	0.00665598		MXAN_4432	0	0	0
folC	0	0	0.00697011		folC	0.00710019	0.00638167	0.0016043		folC	0	0	0.00665598		folC	0	0	0
MXAN_4800	0	0	0.0112849		MXAN_4800	0.00362563	0.00638167	0.013538		MXAN_4800	0	0	0.00665598		MXAN_4800	0	0	0
MXAN_5683	0	0	0.00680415		MXAN_5683	0.0128911	0.00602713	0.00413741		MXAN_5683	0	0	0.00665598		MXAN_5683	0	0	0
MXAN_4305	0	0	0.00481269		MXAN_4305	0.00322278	0.00496352	0.0119337		MXAN_4305	0	0	0.00665598		MXAN_4305	0	0	0
crdA	0	0	0.00282123		crdA	0.000805695	0.00496352	0.00182947		crdA	0	0	0.00665598		crdA	0	0	0
MXAN_1119	0	0	0.00829775		MXAN_1119	0.00231637	0.00354537	0.000394039		MXAN_1119	0	0	0.00665598		MXAN_1119	0	0	0
MXAN_4640	0	0	0.0167615		MXAN_4640	0.0110783	0.0028363	0.01199		MXAN_4640	0	0	0.00665598		MXAN_4640	0	0	0
MXAN_3966	0	0	0.0633948		MXAN_3966	0.0219048	0	0.196738		MXAN_3966	0	0	0.00665598		MXAN_3966	0	0	0
MXAN_0468	0	0	0.0112849		MXAN_0468	0.0146536	0	0.00962581		MXAN_0468	0	0	0.00665598		MXAN_0468	0	0	0
MXAN_2188	0	0	0.018421		MXAN_2188	0.0128911	0	0.057783		MXAN_2188	0	0	0.00665598		MXAN_2188	0	0	0
hutH	0	0	0.00199146		hutH	0.010323	0	0.0236705		hutH	0	0	0.00665598		hutH	0	0	0
MXAN_4871	0	0	0.01477		MXAN_4871	0.00956763	0	0.00171688		MXAN_4871	0	0	0.00665598		MXAN_4871	0	0	0
MXAN_0349	0	0	0.0033191		MXAN_0349	0.00780517	0	0.00247682		MXAN_0349	0	0	0.00665598		MXAN_0349	0	0	0
tolR	0	0	0.00315314		tolR	0.00730162	0	0.00630462		tolR	0	0	0.00665598		tolR	0	0	0
MXAN_7013	0	0	0.0033191		MXAN_7013	0.00589165	0	0.00565727		MXAN_7013	0	0	0.00665598		MXAN_7013	0	0	0
MXAN_7421	0	0	0.0101233		MXAN_7421	0.00558951	0	0.00194205		MXAN_7421	0	0	0.00665598		MXAN_7421	0	0	0
MXAN_4226	0	0	0.00497865		MXAN_4226	0.00392777	0	0.000703641		MXAN_4226	0	0	0.00665598		MXAN_4226	0	0	0
MXAN_0072	0	0	0		MXAN_0072	0.00362563	0	0.000703641		MXAN_0072	0	0	0.00665598		MXAN_0072	0	0	0
MXAN_1579	0	0	0.00614033		MXAN_1579	0.00352492	0	0		MXAN_1579	0	0	0.00665598		MXAN_1579	0	0	0
MXAN_5317	0	0	0.00116168		MXAN_5317	0.00261851	0	0.00669866		MXAN_5317	0	0	0.00665598		MXAN_5317	0	0	0
nth(1)	0	0	0		nth(1)	0.00196388	0	0.00461588		nth(1)	0	0	0.00665598		nth(1)	0	0	0
MXAN_3241	0	0	0.00165955		MXAN_3241	0.00191353	0	0.00441886		MXAN_3241	0	0	0.00665598		MXAN_3241	0	0	0
MXAN_6806	0	0	0.225035		MXAN_6806	0.00130926	0	0.00115397		MXAN_6806	0	0	0.00665598		MXAN_6806	0	0	0
MXAN_2508	0	0	0		MXAN_2508	0	0	0.00444701		MXAN_2508	0	0	0.00665598		MXAN_2508	0	0	0
dtd	0	0	0		dtd	0	0	0.0041937		dtd	0	0	0.00665598		dtd	0	0	0
MXAN_2039	0	0	0.00248932		MXAN_2039	0	0	0.00365893		MXAN_2039	0	0	0.00665598		MXAN_2039	0	0	0
MXAN_7083	0	0	0.00448078		MXAN_7083	0	0	0.00115397		MXAN_7083	0	0	0.00665598		MXAN_7083	0	0	0
MXAN_6325	0	0	0		MXAN_6325	0	0	0.000337748		MXAN_6325	0	0	0.00665598		MXAN_6325	0	0	0
MXAN_3658	0	0	0.00165955		MXAN_3658	0	0	0		MXAN_3658	0	0	0.00665598		MXAN_3658	0	0	0
MXAN_2870	0	0	0		MXAN_2870	0.00216531	0	0.00852813		MXAN_2870	0.111364	0	0.00637865		MXAN_2870	0	0	0
MXAN_5986	0	0	0.00531056		MXAN_5986	0.00619378	0.0432535	0.00334933		MXAN_5986	0.0510417	0	0.00637865		MXAN_5986	0	0	0
MXAN_1565	0	0	0.0219061		MXAN_1565	0.0189338	0.0329719	0.00340562		MXAN_1565	0.0510417	0	0.00637865		MXAN_1565	0	0	0
MXAN_6723	0	0	0.00298719		MXAN_6723	0.100712	0.148906	0.00199834		MXAN_6723	0	0	0.00637865		MXAN_6723	0	0	0
MXAN_2320	0	0	0.00481269		MXAN_2320	0.0112294	0.0347446	0.00236423		MXAN_2320	0	0	0.00637865		MXAN_2320	0	0	0
MXAN_4177	0	0	0.00165955		MXAN_4177	0.00367599	0.0340356	0.00596687		MXAN_4177	0	0	0.00637865		MXAN_4177	0	0	0
MXAN_5628	0	0	0.00647224		MXAN_5628	0.031976	0.0230449	0.0118493		MXAN_5628	0	0	0.00637865		MXAN_5628	0	0	0
MXAN_6243	0	0	0.00597438		MXAN_6243	0.00694912	0.0212722	0.00661422		MXAN_6243	0	0	0.00637865		MXAN_6243	0	0	0
MXAN_0422	0	0	0.0127785		MXAN_0422	0.00785553	0.0163087	0.0103013		MXAN_0422	0	0	0.00637865		MXAN_0422	0	0	0
MXAN_4963	0	0	0.00448078		MXAN_4963	0.0113301	0.0141815	0.0154238		MXAN_4963	0	0	0.00637865		MXAN_4963	0	0	0
MXAN_2782	0	0	0.0066382		MXAN_2782	0.00337385	0.0120543	0.00833111		MXAN_2782	0	0	0.00637865		MXAN_2782	0	0	0
MXAN_2531	0	0	0.00165955		MXAN_2531	0.000956763	0.0120543	0.000337748		MXAN_2531	0	0	0.00637865		MXAN_2531	0	0	0
MXAN_0530	0	0	0.00647224		MXAN_0530	0.00941657	0.0116997	0.0128626		MXAN_0530	0	0	0.00637865		MXAN_0530	0	0	0
MXAN_0721	0	0	0.00315314		MXAN_0721	0.0127904	0.0113452	0.00064735		MXAN_0721	0	0	0.00637865		MXAN_0721	0	0	0
cydB	0	0	0.0833094		cydB	0.0150564	0.00779981	0.0121308		cydB	0	0	0.00637865		cydB	0	0	0
MXAN_1985	0	0	0.00099573		MXAN_1985	0.00498524	0.00779981	0.0048129		MXAN_1985	0	0	0.00637865		MXAN_1985	0	0	0
MXAN_2984	0	0	0.0084637		MXAN_2984	0.00372634	0.00779981	0.00287085		MXAN_2984	0	0	0.00637865		MXAN_2984	0	0	0
MXAN_2280	0	0	0.00099573		MXAN_2280	0.0012589	0.00779981	0.0207996		MXAN_2280	0	0	0.00637865		MXAN_2280	0	0	0
uvrB	0	0	0.00381696		uvrB	0.0105748	0.0067362	0.00458774		uvrB	0	0	0.00637865		uvrB	0	0	0
MXAN_2970	0	0	0.00813179		MXAN_2970	0.00478382	0.00602713	0.00199834		MXAN_2970	0	0	0.00637865		MXAN_2970	0	0	0
MXAN_1397	0	0	0.00713606		MXAN_1397	0.00830873	0.00460898	0.0122996		MXAN_1397	0	0	0.00637865		MXAN_1397	0	0	0
MXAN_3103	0	0	0.00282123		MXAN_3103	0.00453204	0.00354537	0.00987912		MXAN_3103	0	0	0.00637865		MXAN_3103	0	0	0
MXAN_4415	0	0	0.000165955		MXAN_4415	0.00428026	0.00354537	0.00925991		MXAN_4415	0	0	0.00637865		MXAN_4415	0	0	0
MXAN_2604	0	0	0.0117828		MXAN_2604	0.00146032	0.0028363	0.00824667		MXAN_2604	0	0	0.00637865		MXAN_2604	0	0	0
MXAN_7157	0	0	0.0174253		MXAN_7157	0.0128911	0	0.0298062		MXAN_7157	0	0	0.00637865		MXAN_7157	0	0	0
trmD	0	0	0.0144381		trmD	0.00936621	0	0.00135099		trmD	0	0	0.00637865		trmD	0	0	0
MXAN_5028	0	0	0.00531056		MXAN_5028	0.00876194	0	0.0128063		MXAN_5028	0	0	0.00637865		MXAN_5028	0	0	0
MXAN_2560	0	0	0.00099573		MXAN_2560	0.00871158	0	0.00284271		MXAN_2560	0	0	0.00637865		MXAN_2560	0	0	0
MXAN_1075	0	0	0.0112849		MXAN_1075	0.00750304	0	0.00841554		MXAN_1075	0	0	0.00637865		MXAN_1075	0	0	0
MXAN_3584	0	0	0.00315314		MXAN_3584	0.00735197	0	0.00987912		MXAN_3584	0	0	0.00637865		MXAN_3584	0	0	0
MXAN_1416	0	0	0		MXAN_1416	0.00725126	0	0.00976653		MXAN_1416	0	0	0.00637865		MXAN_1416	0	0	0
MXAN_6046	0	0	0.0121147		MXAN_6046	0.00694912	0	0.0318046		MXAN_6046	0	0	0.00637865		MXAN_6046	0	0	0
MXAN_7330	0	0	0		MXAN_7330	0.00689877	0	0.011793		MXAN_7330	0	0	0.00637865		MXAN_7330	0	0	0
MXAN_3015	0	0	0.00248932		MXAN_3015	0.00473346	0	0.00315231		MXAN_3015	0	0	0.00637865		MXAN_3015	0	0	0
MXAN_2811	0	0	0.0051446		MXAN_2811	0.00453204	0	0.00405297		MXAN_2811	0	0	0.00637865		MXAN_2811	0	0	0
MXAN_0918	0	0	0.0260549		MXAN_0918	0.00382705	0	0.0176755		MXAN_0918	0	0	0.00637865		MXAN_0918	0	0	0
MXAN_0260	0	0	0.0101233		MXAN_0260	0.00382705	0	0.00385595		MXAN_0260	0	0	0.00637865		MXAN_0260	0	0	0
MXAN_1060	0	0	0.00165955		MXAN_1060	0.00372634	0	0.00337748		MXAN_1060	0	0	0.00637865		MXAN_1060	0	0	0
frzA	0	0	0.0237316		frzA	0.00342421	0	0.0155645		frzA	0	0	0.00637865		frzA	0	0	0
MXAN_7348	0	0	0.00879561		MXAN_7348	0.00342421	0	0.00712085		MXAN_7348	0	0	0.00637865		MXAN_7348	0	0	0
MXAN_4266	0	0	0.00099573		MXAN_4266	0.00246744	0	0.00132284		MXAN_4266	0	0	0.00637865		MXAN_4266	0	0	0
MXAN_6690	0	0	0		MXAN_6690	0.00186317	0	0.00132284		MXAN_6690	0	0	0.00637865		MXAN_6690	0	0	0
MXAN_3018	0	0	0		MXAN_3018	0	0	0.0144106		MXAN_3018	0	0	0.00637865		MXAN_3018	0	0	0
MXAN_1991	0	0.66322	0.00298719		MXAN_1991	0	0	0.00909104		MXAN_1991	0	0	0.00637865		MXAN_1991	0	0	0
coaD(2)	0	0	0		coaD(2)	0	0	0.00844369		coaD(2)	0	0	0.00637865		coaD(2)	0	0	0
MXAN_5657	0	0	0.00763393		MXAN_5657	0	0	0.00295529		MXAN_5657	0	0	0.00637865		MXAN_5657	0	0	0
MXAN_5679	0	0	0.0386675		MXAN_5679	0	0	0.00135099		MXAN_5679	0	0	0.00637865		MXAN_5679	0	0	0
MXAN_5797	0	0	0.00315314		MXAN_5797	0	0	0.00132284		MXAN_5797	0	0	0.00637865		MXAN_5797	0	0	0
MXAN_5064	0	0	0.00431483		MXAN_5064	0	0	0.00090066		MXAN_5064	0	0	0.00637865		MXAN_5064	0	0	0
MXAN_1298	0	0	0.00879561		MXAN_1298	0	0	0		MXAN_1298	0	0	0.00637865		MXAN_1298	0	0	0
MXAN_4620	0	0.102602	0.00365101		MXAN_4620	0.00433061	0.0067362	0.00574171		MXAN_4620	0	0.354331	0.00610132		MXAN_4620	0	0	0
hflK	0	0	0.0101233		hflK	0.00478382	0.00744528	0.00588244		hflK	0.236648	0	0.00610132		hflK	0	0	0
MXAN_1525	0	0	0.0142721		MXAN_1525	0.00483417	0.00744528	0.0207152		MXAN_1525	0.0788827	0	0.00610132		MXAN_1525	0	0	0
MXAN_5619	0	0	0.00298719		MXAN_5619	0.00236673	0	0.00104139		MXAN_5619	0.0788827	0	0.00610132		MXAN_5619	0	0	0
MXAN_0144	0	0	0.0117828		MXAN_0144	0.0054888	0	0.0137632		MXAN_0144	0.0556819	0	0.00610132		MXAN_0144	0	0	0
MXAN_2906	0	0	0.0253911		MXAN_2906	0.0107762	0.00886343	0.0865197		MXAN_2906	0.0324811	0	0.00610132		MXAN_2906	0	0	0
MXAN_5640	0	0	0.029374		MXAN_5640	0.0175742	0.0152451	0.0199271		MXAN_5640	0.0278409	0	0.00610132		MXAN_5640	0	0	0
MXAN_6880	0	0	0.00282123		MXAN_6880	0.14719	0.553787	0.00698012		MXAN_6880	0	0	0.00610132		MXAN_6880	0	0	0
smpB	0	0	0.0376718		smpB	0.0836413	0.164151	0.00889402		smpB	0	0	0.00610132		smpB	0	0	0
MXAN_6210	0	0	0		MXAN_6210	0.0673259	0.0694893	0.0012947		MXAN_6210	0	0	0.00610132		MXAN_6210	0	0	0
cydA	0	0	0.0126126		cydA	0.029559	0.0684256	0.0282582		cydA	0	0	0.00610132		cydA	0	0	0
MXAN_2443	0	0	0.040659		MXAN_2443	0.0133947	0.0616894	0.00253311		MXAN_2443	0	0	0.00610132		MXAN_2443	0	0	0
fadJ(2)	0	0.102385	0.00630629		fadJ(2)	0.019387	0.0567259	0.0133692		fadJ(2)	0	0	0.00610132		fadJ(2)	0	0	0
MXAN_4087	0	0	0.0107871		MXAN_4087	0.0126393	0.0333265	0.00064735		MXAN_4087	0	0	0.00610132		MXAN_4087	0	0	0
MXAN_3368	0	0	0.00464674		MXAN_3368	0.0178764	0.0329719	0.00737416		MXAN_3368	0	0	0.00610132		MXAN_3368	0	0	0
MXAN_7323	0	0	0.0114509		MXAN_7323	0.00976906	0.0301356	0.0154801		MXAN_7323	0	0	0.00610132		MXAN_7323	0	0	0
MXAN_5926	0	0	0.00149359		MXAN_5926	0.00715055	0.0219813	0.0144387		MXAN_5926	0	0	0.00610132		MXAN_5926	0	0	0
MXAN_2806	0	0	0.00763393		MXAN_2806	0.00528738	0.0219813	0.00444701		MXAN_2806	0	0	0.00610132		MXAN_2806	0	0	0
MXAN_6752	0	0	0.00282123		MXAN_6752	0.0230127	0.0202086	0.00123841		MXAN_6752	0	0	0.00610132		MXAN_6752	0	0	0
MXAN_0285	0	0	0.00282123		MXAN_0285	0.00327314	0.0202086	0.00934435		MXAN_0285	0	0	0.00610132		MXAN_0285	0	0	0
MXAN_5902	0	0	0.00165955		MXAN_5902	0.00281993	0.0116997	0.00211092		MXAN_5902	0	0	0.00610132		MXAN_5902	0	0	0
grpE	0	0	0.00315314		grpE	0.0107762	0.0109906	0.0154801		grpE	0	0	0.00610132		grpE	0	0	0
MXAN_6829	0	0	0.00464674		MXAN_6829	0.00715055	0.0109906	0.0150579		MXAN_6829	0	0	0.00610132		MXAN_6829	0	0	0
MXAN_2343	0	0	0.00763393		MXAN_2343	0.00715055	0.0109906	0.002899		MXAN_2343	0	0	0.00610132		MXAN_2343	0	0	0
MXAN_0665	0	0	0.00464674		MXAN_0665	0.00538809	0.0109906	0.00064735		MXAN_0665	0	0	0.00610132		MXAN_0665	0	0	0
crt(2)	0	0	0.00448078		crt(2)	0.00528738	0.0109906	0.0107798		crt(2)	0	0	0.00610132		crt(2)	0	0	0
MXAN_4151	0	0	0		MXAN_4151	0.00181281	0.0109906	0.00225165		MXAN_4151	0	0	0.00610132		MXAN_4151	0	0	0
pgm	0	0	0.00564247		pgm	0.0235162	0.00921796	0.017394		pgm	0	0	0.00610132		pgm	0	0	0
selB	0	0	0.00531056		selB	0.00433061	0.00779981	0.00168874		selB	0	0	0.00610132		selB	0	0	0
MXAN_1160	0	0	0.0051446		MXAN_1160	0.00730162	0.00744528	0.0012947		MXAN_1160	0	0	0.00610132		MXAN_1160	0	0	0
tilS	0	0	0.00547651		tilS	0.00271922	0.00567259	0.000478476		tilS	0	0	0.00610132		tilS	0	0	0
MXAN_3550	0	0	0.0099573		MXAN_3550	0.0012589	0.00389991	0.00804965		MXAN_3550	0	0	0.00610132		MXAN_3550	0	0	0
MXAN_6522	0	0	0.00282123		MXAN_6522	0.00986977	0	0.00312417		MXAN_6522	0	0	0.00610132		MXAN_6522	0	0	0
lpxA	0	0	0		lpxA	0.00886265	0	0.00920362		lpxA	0	0	0.00610132		lpxA	0	0	0
MXAN_1520	0	0	0.0121147		MXAN_1520	0.00881229	0	0.00472847		MXAN_1520	0	0	0.00610132		MXAN_1520	0	0	0
prfC	0	0	0.00697011		prfC	0.00740233	0	0.0138195		prfC	0	0	0.00610132		prfC	0	0	0
MXAN_5361	0	0	0.00829775		MXAN_5361	0.0067477	0	0.00284271		MXAN_5361	0	0	0.00610132		MXAN_5361	0	0	0
MXAN_1136	0	0	0.00282123		MXAN_1136	0.00664699	0	0.0150861		MXAN_1136	0	0	0.00610132		MXAN_1136	0	0	0
MXAN_5947	0	0	0.00912752		MXAN_5947	0.00538809	0	0.00512251		MXAN_5947	0	0	0.00610132		MXAN_5947	0	0	0
MXAN_1382	0	0	0.00597438		MXAN_1382	0.00523702	0	0.00346191		MXAN_1382	0	0	0.00610132		MXAN_1382	0	0	0
MXAN_5687	0	0	0.00365101		MXAN_5687	0.00362563	0	0.00526323		MXAN_5687	0	0	0.00610132		MXAN_5687	0	0	0
MXAN_0765	0	0	0.00912752		MXAN_0765	0.00352492	0	0.00253311		MXAN_0765	0	0	0.00610132		MXAN_0765	0	0	0
MXAN_4425	0	0	0.00862966		MXAN_4425	0.00332349	0	0.0201241		MXAN_4425	0	0	0.00610132		MXAN_4425	0	0	0
MXAN_5569	0	0	0		MXAN_5569	0.00332349	0	0.00509436		MXAN_5569	0	0	0.00610132		MXAN_5569	0	0	0
mgtE(2)	0	0	0.00713606		mgtE(2)	0.00281993	0	0.00211092		mgtE(2)	0	0	0.00610132		mgtE(2)	0	0	0
MXAN_0944	0	0	0.00315314		MXAN_0944	0.00120854	0	0.000422185		MXAN_0944	0	0	0.00610132		MXAN_0944	0	0	0
MXAN_3981	0	0	0		MXAN_3981	0	0	0.00484105		MXAN_3981	0	0	0.00610132		MXAN_3981	0	0	0
MXAN_2712	0	0	0.00597438		MXAN_2712	0	0	0.00470032		MXAN_2712	0	0	0.00610132		MXAN_2712	0	0	0
MXAN_3973	0	0	0.00298719		MXAN_3973	0	0	0.00250496		MXAN_3973	0	0	0.00610132		MXAN_3973	0	0	0
MXAN_0051	0	0	0.00597438		MXAN_0051	0	0	0.000928806		MXAN_0051	0	0	0.00610132		MXAN_0051	0	0	0
MXAN_4268	0	0	0.00282123		MXAN_4268	0	0	0.00064735		MXAN_4268	0	0	0.00610132		MXAN_4268	0	0	0
MXAN_6915	0	0	0		MXAN_6915	0	0	0		MXAN_6915	0	0	0.00610132		MXAN_6915	0	0	0
MXAN_1478	0	0	0.00564247		MXAN_1478	0	0	0.0067831		MXAN_1478	0.208807	0	0.00582398		MXAN_1478	0	0	0
MXAN_7355	0	0	0.0250592		MXAN_7355	0.0412919	0.0531806	0.0270761		MXAN_7355	0	0	0.00582398		MXAN_7355	0	0	0
MXAN_0654	0	0	0.00282123		MXAN_0654	0.00317243	0.0393536	0.00121026		MXAN_0654	0	0	0.00582398		MXAN_0654	0	0	0
MXAN_2752	0	0	0.00614033		MXAN_2752	0.0120351	0.0262357	0.0051788		MXAN_2752	0	0	0.00582398		MXAN_2752	0	0	0
MXAN_4904	0	0	0.0099573		MXAN_4904	0.00997048	0.0205631	0.00385595		MXAN_4904	0	0	0.00582398		MXAN_4904	0	0	0
MXAN_4462	0	0	0		MXAN_4462	0.00332349	0.0205631	0.00118212		MXAN_4462	0	0	0.00582398		MXAN_4462	0	0	0
def(1)	0	0	0.00547651		def(1)	0.0126897	0.0194995	0.0215314		def(1)	0	0	0.00582398		def(1)	0	0	0
MXAN_3802	0	0	0.00813179		MXAN_3802	0.0345442	0.019145	0.0224884		MXAN_3802	0	0	0.00582398		MXAN_3802	0	0	0
MXAN_3191	0	0	0.00597438		MXAN_3191	0.0128408	0.014536	0.0090066		MXAN_3191	0	0	0.00582398		MXAN_3191	0	0	0
dnaN	0	0	0.0273826		dnaN	0.0206963	0.0141815	0.0294403		dnaN	0	0	0.00582398		dnaN	0	0	0
MXAN_2694	0	0	0		MXAN_2694	0.00342421	0.0141815	0.00337748		MXAN_2694	0	0	0.00582398		MXAN_2694	0	0	0
MXAN_6847	0	0	0.00448078		MXAN_6847	0.00438097	0.0109906	0.000140728		MXAN_6847	0	0	0.00582398		MXAN_6847	0	0	0
nhaA(1)	0	0.165642	0.018421		nhaA(1)	0.00609307	0.0106361	0.0314668		nhaA(1)	0	0	0.00582398		nhaA(1)	0	0	0
MXAN_5367	0	0	0		MXAN_5367	0.0017121	0.0106361	0.00681124		MXAN_5367	0	0	0.00582398		MXAN_5367	0	0	0
dapB	0	0.319546	0.00713606		dapB	0.013294	0.0102816	0.00444701		dapB	0	0	0.00582398		dapB	0	0	0
MXAN_1063	0	0	0.00282123		MXAN_1063	0.0100208	0.0102816	0.0107516		MXAN_1063	0	0	0.00582398		MXAN_1063	0	0	0
MXAN_6575	0	0	0.00199146		MXAN_6575	0.00352492	0.00744528	0.00123841		MXAN_6575	0	0	0.00582398		MXAN_6575	0	0	0
MXAN_6935	0	0	0.00099573		MXAN_6935	0.00120854	0.00744528	0.000197019		MXAN_6935	0	0	0.00582398		MXAN_6935	0	0	0
MXAN_0746	0	0	0.0033191		MXAN_0746	0.00372634	0.00709074	0.00346191		MXAN_0746	0	0	0.00582398		MXAN_0746	0	0	0
MXAN_6823	0	0	0.000829775		MXAN_6823	0.0169196	0.00567259	0.00478476		MXAN_6823	0	0	0.00582398		MXAN_6823	0	0	0
MXAN_0562	0	0	0.0152679		MXAN_0562	0.00266887	0.00567259	0.0104139		MXAN_0562	0	0	0.00582398		MXAN_0562	0	0	0
MXAN_6339	0	0.169338	0.00896157		MXAN_6339	0.0115315	0.00531806	0.0197301		MXAN_6339	0	0	0.00582398		MXAN_6339	0	0	0
glnS	0	0	0.00962539		glnS	0.00498524	0.00425444	0.0123841		glnS	0	0	0.00582398		glnS	0	0	0
MXAN_2631	0	0	0.00531056		MXAN_2631	0.00276958	0.00425444	0.00180132		MXAN_2631	0	0	0.00582398		MXAN_2631	0	0	0
MXAN_2586	0	0	0.0280464		MXAN_2586	0.00715055	0.00319083	0.00726157		MXAN_2586	0	0	0.00582398		MXAN_2586	0	0	0
MXAN_1110	0	0	0.0162636		MXAN_1110	0.0439608	0	0.0313824		MXAN_1110	0	0	0.00582398		MXAN_1110	0	0	0
purE	0	0	0.0084637		purE	0.026034	0	0.00554469		purE	0	0	0.00582398		purE	0	0	0
nrdR	0	0	0.0164295		nrdR	0.0190346	0	0.0209404		nrdR	0	0	0.00582398		nrdR	0	0	0
MXAN_2654	0	0	0.0114509		MXAN_2654	0.013294	0	0.0104139		MXAN_2654	0	0	0.00582398		MXAN_2654	0	0	0
MXAN_3114	0	0	0		MXAN_3114	0.012589	0	0.0130314		MXAN_3114	0	0	0.00582398		MXAN_3114	0	0	0
MXAN_3763	0	0	0.00282123		MXAN_3763	0.0118337	0	0.00363079		MXAN_3763	0	0	0.00582398		MXAN_3763	0	0	0
MXAN_5838	0	0	0.0174253		MXAN_5838	0.0101719	0	0.0166622		MXAN_5838	0	0	0.00582398		MXAN_5838	0	0	0
ribE(2)	0	0	0.011119		ribE(2)	0.00956763	0	0.00180132		ribE(2)	0	0	0.00582398		ribE(2)	0	0	0
MXAN_7133	0	0	0.0247273		MXAN_7133	0.00951728	0	0.0119619		MXAN_7133	0	0	0.00582398		MXAN_7133	0	0	0
MXAN_4656	0	0	0.00713606		MXAN_4656	0.00669734	0	0.00661422		MXAN_4656	0	0	0.00582398		MXAN_4656	0	0	0
MXAN_4566	0	0	0.0141062		MXAN_4566	0.00649592	0	0.0197019		MXAN_4566	0	0	0.00582398		MXAN_4566	0	0	0
MXAN_2646	0	0	0.011119		MXAN_2646	0.00644556	0	0.00427814		MXAN_2646	0	0	0.00582398		MXAN_2646	0	0	0
MXAN_3022	0	0	0.0272166		MXAN_3022	0.0062945	0	0.0331556		MXAN_3022	0	0	0.00582398		MXAN_3022	0	0	0
MXAN_3785	0	0	0.00265528		MXAN_3785	0.0062945	0	0.00531952		MXAN_3785	0	0	0.00582398		MXAN_3785	0	0	0
MXAN_0328	0	0	0.00813179		MXAN_0328	0.0062945	0	0.000591058		MXAN_0328	0	0	0.00582398		MXAN_0328	0	0	0
thiO	0	0	0.00282123		thiO	0.00569022	0	0.00219536		thiO	0	0	0.00582398		thiO	0	0	0
MXAN_2481	0	0	0.0106211		MXAN_2481	0.00443133	0	0.0106672		MXAN_2481	0	0	0.00582398		MXAN_2481	0	0	0
MXAN_6011	0	0	0.00149359		MXAN_6011	0.00347456	0	0.00605131		MXAN_6011	0	0	0.00582398		MXAN_6011	0	0	0
MXAN_3140	0	0	0.0101233		MXAN_3140	0.00337385	0	0.00453145		MXAN_3140	0	0	0.00582398		MXAN_3140	0	0	0
MXAN_2010	0	0	0.00398292		MXAN_2010	0.00231637	0	0.000816223		MXAN_2010	0	0	0.00582398		MXAN_2010	0	0	0
MXAN_5812	0	0	0		MXAN_5812	0.0017121	0	0.00185761		MXAN_5812	0	0	0.00582398		MXAN_5812	0	0	0
MXAN_0738	0	0	0.00713606		MXAN_0738	0.00166175	0	0.00301158		MXAN_0738	0	0	0.00582398		MXAN_0738	0	0	0
MXAN_0668	0	0	0.00282123		MXAN_0668	0.00166175	0	0.00180132		MXAN_0668	0	0	0.00582398		MXAN_0668	0	0	0
MXAN_5129	0	0	0.00448078		MXAN_5129	0.00120854	0	0.00765561		MXAN_5129	0	0	0.00582398		MXAN_5129	0	0	0
MXAN_0894	0	0	0.0119488		MXAN_0894	0.00115819	0	0.00166059		MXAN_0894	0	0	0.00582398		MXAN_0894	0	0	0
MXAN_6807	0	0	0.0255571		MXAN_6807	0.000704984	0	0.00782449		MXAN_6807	0	0	0.00582398		MXAN_6807	0	0	0
MXAN_4239	0	0	0.0084637		MXAN_4239	0	0	0.0240364		MXAN_4239	0	0	0.00582398		MXAN_4239	0	0	0
MXAN_0513	0	0	0		MXAN_0513	0	0	0.00861256		MXAN_0513	0	0	0.00582398		MXAN_0513	0	0	0
MXAN_2500	0	0	0		MXAN_2500	0	0	0.00363079		MXAN_2500	0	0	0.00582398		MXAN_2500	0	0	0
MXAN_4776	0	0	0		MXAN_4776	0	0	0.00301158		MXAN_4776	0	0	0.00582398		MXAN_4776	0	0	0
MXAN_6786	0	0	0.010953		MXAN_6786	0	0	0.00236423		MXAN_6786	0	0	0.00582398		MXAN_6786	0	0	0
MXAN_2643	0	0	0.00199146		MXAN_2643	0	0	0.00205463		MXAN_2643	0	0	0.00582398		MXAN_2643	0	0	0
coaD(1)	0	0	0		coaD(1)	0	0	0.00182947		coaD(1)	0	0	0.00582398		coaD(1)	0	0	0
MXAN_5102	0	0	0		MXAN_5102	0	0	0.00121026		MXAN_5102	0	0	0.00582398		MXAN_5102	0	0	0
MXAN_7010	0	0	0		MXAN_7010	0	0	0.00121026		MXAN_7010	0	0	0.00582398		MXAN_7010	0	0	0
MXAN_5062	0	0	0		MXAN_5062	0	0	0.00090066		MXAN_5062	0	0	0.00582398		MXAN_5062	0	0	0
MXAN_0410	0	0	0.00282123		MXAN_0410	0	0	0.000619204		MXAN_0410	0	0	0.00582398		MXAN_0410	0	0	0
MXAN_3703	0	0	0.0240635		MXAN_3703	0	0	0.005798		MXAN_3703	0	1.88976	0.00554665		MXAN_3703	0	0	0
MXAN_2876	0	0	0.0106211		MXAN_2876	0.00689877	0.00389991	0.0489171		MXAN_2876	0	0.393701	0.00554665		MXAN_2876	0	0	0
MXAN_0057	0	0	0.0233997		MXAN_0057	0.0180778	0.0553078	0.0118493		MXAN_0057	0.194887	0	0.00554665		MXAN_0057	0	0	0
MXAN_0919	0	0	0.0287102		MXAN_0919	0.00302136	0	0.0378277		MXAN_0919	0.194887	0	0.00554665		MXAN_0919	0	0	0
MXAN_5685	0	0	0.0154338		MXAN_5685	0.0163657	0.0301356	0.0305943		MXAN_5685	0.106724	0	0.00554665		MXAN_5685	0	0	0
nla6	0	0	0.00779988		nla6	0.0965324	0.150678	0.0130877		nla6	0	0	0.00554665		nla6	0	0	0
MXAN_4093	0	0	0.0018255		MXAN_4093	0.0403855	0.0943068	0		MXAN_4093	0	0	0.00554665		MXAN_4093	0	0	0
MXAN_7391	0	0	0		MXAN_7391	0.00689877	0.0560168	0		MXAN_7391	0	0	0.00554665		MXAN_7391	0	0	0
MXAN_6957	0	0	0.00099573		MXAN_6957	0.00790589	0.0209177	0		MXAN_6957	0	0	0.00554665		MXAN_6957	0	0	0
MXAN_5031	0	0	0.0152679		MXAN_5031	0.0122869	0.0205631	0.0035182		MXAN_5031	0	0	0.00554665		MXAN_5031	0	0	0
MXAN_6878	0	0	0.00414887		MXAN_6878	0.00483417	0.0198541	0.00599502		MXAN_6878	0	0	0.00554665		MXAN_6878	0	0	0
MXAN_5836	0	0	0.00680415		MXAN_5836	0.0136968	0.0177269	0.00793707		MXAN_5836	0	0	0.00554665		MXAN_5836	0	0	0
MXAN_3956	0	0	0.00580842		MXAN_3956	0.00553916	0.0170178	0.00619204		MXAN_3956	0	0	0.00554665		MXAN_3956	0	0	0
MXAN_3713	0	0	0.0144381		MXAN_3713	0.0373641	0.0155996	0.0162119		MXAN_3713	0	0	0.00554665		MXAN_3713	0	0	0
MXAN_1570	0	0	0.00763393		MXAN_1570	0.0111287	0.0138269	0.00273013		MXAN_1570	0	0	0.00554665		MXAN_1570	0	0	0
MXAN_0625	0	0	0.00215741		MXAN_0625	0.00851016	0.0106361	0.00427814		MXAN_0625	0	0	0.00554665		MXAN_0625	0	0	0
MXAN_6624	0	0	0		MXAN_6624	0.0147543	0.0102816	0.0146357		MXAN_6624	0	0	0.00554665		MXAN_6624	0	0	0
MXAN_5978	0	0	0.0126126		MXAN_5978	0.00493488	0.0102816	0.0122996		MXAN_5978	0	0	0.00554665		MXAN_5978	0	0	0
MXAN_2437	0	0	0.0165955		MXAN_2437	0.0418962	0.00992704	0.0160993		MXAN_2437	0	0	0.00554665		MXAN_2437	0	0	0
kdsA	0	0	0.00962539		kdsA	0.0177253	0.00992704	0.0379122		kdsA	0	0	0.00554665		kdsA	0	0	0
MXAN_3835	0	0	0.00282123		MXAN_3835	0.00322278	0.00992704	0.00230794		MXAN_3835	0	0	0.00554665		MXAN_3835	0	0	0
MXAN_1090	0	0	0.00547651		MXAN_1090	0.00161139	0.00992704	0.00340562		MXAN_1090	0	0	0.00554665		MXAN_1090	0	0	0
MXAN_6195	0	0	0.00547651		MXAN_6195	0.0108265	0.0067362	0.00472847		MXAN_6195	0	0	0.00554665		MXAN_6195	0	0	0
MXAN_5565	0	0	0.0101233		MXAN_5565	0.00649592	0.0067362	0.0054884		MXAN_5565	0	0	0.00554665		MXAN_5565	0	0	0
MXAN_2852	0	0	0.00564247		MXAN_2852	0.00166175	0.00531806	0.00247682		MXAN_2852	0	0	0.00554665		MXAN_2852	0	0	0
MXAN_2358	0	0	0.00149359		MXAN_2358	0.000856051	0.00531806	0.00292715		MXAN_2358	0	0	0.00554665		MXAN_2358	0	0	0
MXAN_3838	0	0.105428	0.00697011		MXAN_3838	0.00387741	0.00354537	0.00703641		MXAN_3838	0	0	0.00554665		MXAN_3838	0	0	0
pkn1(2)	0	0	0.00149359		pkn1(2)	0	0.00354537	0.000281456		pkn1(2)	0	0	0.00554665		pkn1(2)	0	0	0
MXAN_5555	0	0	0.0521099		MXAN_5555	0.0150564	0	0.0401075		MXAN_5555	0	0	0.00554665		MXAN_5555	0	0	0
MXAN_0792	0	0	0.00497865		MXAN_0792	0.0142004	0	0.0327334		MXAN_0792	0	0	0.00554665		MXAN_0792	0	0	0
MXAN_1440	0	0	0		MXAN_1440	0.0121358	0	0.00399668		MXAN_1440	0	0	0.00554665		MXAN_1440	0	0	0
prfB	0	0	0.00481269		prfB	0.00790589	0	0.0182384		prfB	0	0	0.00554665		prfB	0	0	0
MXAN_5841	0	0	0.00132764		MXAN_5841	0.00327314	0	0.0145794		MXAN_5841	0	0	0.00554665		MXAN_5841	0	0	0
MXAN_5335	0	0	0.00697011		MXAN_5335	0.00327314	0	0.00177317		MXAN_5335	0	0	0.00554665		MXAN_5335	0	0	0
MXAN_1079	0	0	0.00132764		MXAN_1079	0.00322278	0	0.00171688		MXAN_1079	0	0	0.00554665		MXAN_1079	0	0	0
MXAN_4581	0	0	0		MXAN_4581	0.00307171	0	0.00233609		MXAN_4581	0	0	0.00554665		MXAN_4581	0	0	0
MXAN_3235	0	0	0.00265528		MXAN_3235	0.00302136	0	0.00847184		MXAN_3235	0	0	0.00554665		MXAN_3235	0	0	0
MXAN_2424	0	0	0.00414887		MXAN_2424	0.00166175	0	0.00379966		MXAN_2424	0	0	0.00554665		MXAN_2424	0	0	0
MXAN_5807	0	0	0.00149359		MXAN_5807	0.00166175	0	0.00149172		MXAN_5807	0	0	0.00554665		MXAN_5807	0	0	0
MXAN_4668	0	0.618875	0.00829775		MXAN_4668	0.00161139	0	0.00776819		MXAN_4668	0	0	0.00554665		MXAN_4668	0	0	0
MXAN_7232	0	0	0.00282123		MXAN_7232	0.00161139	0	0.00292715		MXAN_7232	0	0	0.00554665		MXAN_7232	0	0	0
MXAN_4782	0	0	0		MXAN_4782	0.00161139	0	0.000844369		MXAN_4782	0	0	0.00554665		MXAN_4782	0	0	0
MXAN_4447	0	0	0.0084637		MXAN_4447	0.00110783	0	0.00349006		MXAN_4447	0	0	0.00554665		MXAN_4447	0	0	0
recF	0	0	0.00099573		recF	0.00110783	0	0.00135099		recF	0	0	0.00554665		recF	0	0	0
MXAN_5605	0	0	0		MXAN_5605	0.00105748	0	0.0032086		MXAN_5605	0	0	0.00554665		MXAN_5605	0	0	0
MXAN_6899	0	0	0.00132764		MXAN_6899	0	0	0.00143543		MXAN_6899	0	0	0.00554665		MXAN_6899	0	0	0
MXAN_6281	0	0	0.00414887		MXAN_6281	0	0	0.000281456		MXAN_6281	0	0	0.00554665		MXAN_6281	0	0	0
MXAN_0502	0	0	0.00265528		MXAN_0502	0	0	0		MXAN_0502	0	0	0.00554665		MXAN_0502	0	0	0
MXAN_7468	0	0	0.00779988		MXAN_7468	0	0	0		MXAN_7468	0	0	0.00554665		MXAN_7468	0	0	0
MXAN_6698	0	0	0.0107871		MXAN_6698	0.00871158	0.0194995	0.00301158		MXAN_6698	0	0.511811	0.00526932		MXAN_6698	0	0	0
MXAN_3878	0	0	0.0192508		MXAN_3878	0.00206459	0	0.0341125		MXAN_3878	0.0696023	0	0.00526932		MXAN_3878	0	0	0
MXAN_3108	0	0	0.00796584		MXAN_3108	0.00312207	0.00319083	0.0106109		MXAN_3108	0.0371212	0	0.00526932		MXAN_3108	0	0	0
MXAN_1419	0	0	0.0351825		MXAN_1419	0.0990502	0.0535351	0.0680843		MXAN_1419	0	0	0.00526932		MXAN_1419	0	0	0
pepP(2)	0	0	0.00730202		pepP(2)	0.0210991	0.0194995	0.0259503		pepP(2)	0	0	0.00526932		pepP(2)	0	0	0
MXAN_4246	0	0	0.00813179		MXAN_4246	0.00740233	0.0194995	0.0121589		MXAN_4246	0	0	0.00526932		MXAN_4246	0	0	0
mreC	0	0	0.0278804		mreC	0.0186821	0.019145	0.00303973		mreC	0	0	0.00526932		mreC	0	0	0
rocD	0	0	0.00348505		rocD	0.0143515	0.019145	0.0093162		rocD	0	0	0.00526932		rocD	0	0	0
scpA	0	0	0.00398292		scpA	0.00770446	0.019145	0.00244867		scpA	0	0	0.00526932		scpA	0	0	0
MXAN_5665	0	0	0.00132764		MXAN_5665	0.00906407	0.0187905	0.00267384		MXAN_5665	0	0	0.00526932		MXAN_5665	0	0	0
MXAN_5050	0	0	0		MXAN_5050	0.00599236	0.0184359	0.00278642		MXAN_5050	0	0	0.00526932		MXAN_5050	0	0	0
MXAN_7390	0	0	0.0204125		MXAN_7390	0.0266383	0.0180814	0.0388128		MXAN_7390	0	0	0.00526932		MXAN_7390	0	0	0
MXAN_4076	0	0	0		MXAN_4076	0.0145529	0.0177269	0.00163245		MXAN_4076	0	0	0.00526932		MXAN_4076	0	0	0
MXAN_3988	0	0	0.00497865		MXAN_3988	0	0.0177269	0.00909104		MXAN_3988	0	0	0.00526932		MXAN_3988	0	0	0
MXAN_7449	0	0	0		MXAN_7449	0	0.0177269	0.00163245		MXAN_7449	0	0	0.00526932		MXAN_7449	0	0	0
MXAN_7023	0	0	0.0104552		MXAN_7023	0.00906407	0.0166632	0.00475661		MXAN_7023	0	0	0.00526932		MXAN_7023	0	0	0
MXAN_6934	0	0	0.0033191		MXAN_6934	0.0104237	0.0163087	0.000788078		MXAN_6934	0	0	0.00526932		MXAN_6934	0	0	0
MXAN_1141	0	0	0.00597438		MXAN_1141	0.0168189	0.0152451	0.00762747		MXAN_1141	0	0	0.00526932		MXAN_1141	0	0	0
MXAN_4032	0	0	0.0116168		MXAN_4032	0.0144522	0.0148906	0.00529138		MXAN_4032	0	0	0.00526932		MXAN_4032	0	0	0
prmA	0	0	0.00531056		prmA	0.00619378	0.0095725	0.00712085		prmA	0	0	0.00526932		prmA	0	0	0
folD(2)	0	0	0.00398292		folD(2)	0.00619378	0.0095725	0.00492549		folD(2)	0	0	0.00526932		folD(2)	0	0	0
MXAN_6042	0	0	0.00912752		MXAN_6042	0.00614343	0.0095725	0.00163245		MXAN_6042	0	0	0.00526932		MXAN_6042	0	0	0
MXAN_4959	0	0	0.0155998		MXAN_4959	0.00609307	0.0095725	0.0140728		MXAN_4959	0	0	0.00526932		MXAN_4959	0	0	0
MXAN_6940	0	0	0		MXAN_6940	0.000453204	0.0095725	0.00315231		MXAN_6940	0	0	0.00526932		MXAN_6940	0	0	0
folP	0	0	0		folP	0	0.0095725	0.00244867		folP	0	0	0.00526932		folP	0	0	0
valS	0	0	0.00713606		valS	0.0135458	0.00709074	0.0233327		valS	0	0	0.00526932		valS	0	0	0
MXAN_4621	0	0	0.00232337		MXAN_4621	0.00266887	0.00567259	0.00301158		MXAN_4621	0	0	0.00526932		MXAN_4621	0	0	0
MXAN_1088	0	0	0.0152679		MXAN_1088	0.00704984	0.00496352	0.0166341		MXAN_1088	0	0	0.00526932		MXAN_1088	0	0	0
MXAN_3668	0	0	0.00066382		MXAN_3668	0.00553916	0.00496352	0.00478476		MXAN_3668	0	0	0.00526932		MXAN_3668	0	0	0
MXAN_0910	0	0	0.00680415		MXAN_0910	0.00236673	0.00496352	0.00261754		MXAN_0910	0	0	0.00526932		MXAN_0910	0	0	0
MXAN_5351	0	0	0.00298719		MXAN_5351	0.00558951	0.00425444	0.00413741		MXAN_5351	0	0	0.00526932		MXAN_5351	0	0	0
MXAN_5837	0	0	0.0101233		MXAN_5837	0.00161139	0.00389991	0.00151986		MXAN_5837	0	0	0.00526932		MXAN_5837	0	0	0
MXAN_2482	0	0	0.00680415		MXAN_2482	0.0105244	0	0.0133129		MXAN_2482	0	0	0.00526932		MXAN_2482	0	0	0
MXAN_2164	0	0	0.0180891		MXAN_2164	0.00896336	0	0.0122996		MXAN_2164	0	0	0.00526932		MXAN_2164	0	0	0
greB	0	0	0.00248932		greB	0.00886265	0	0.00109768		greB	0	0	0.00526932		greB	0	0	0
MXAN_6890	0	0	0.00365101		MXAN_6890	0.00644556	0	0.00281456		MXAN_6890	0	0	0.00526932		MXAN_6890	0	0	0
MXAN_2517	0	0	0.00398292		MXAN_2517	0.0062945	0	0.00140728		MXAN_2517	0	0	0.00526932		MXAN_2517	0	0	0
MXAN_3400	0	0	0.00199146		MXAN_3400	0.00473346	0	0.00177317		MXAN_3400	0	0	0.00526932		MXAN_3400	0	0	0
MXAN_6982	0	0	0.00796584		MXAN_6982	0.00463275	0	0.00495363		MXAN_6982	0	0	0.00526932		MXAN_6982	0	0	0
thrS(2)	0	0	0.00531056		thrS(2)	0.00417955	0	0.00199834		thrS(2)	0	0	0.00526932		thrS(2)	0	0	0
MXAN_2865	0	0	0		MXAN_2865	0.00322278	0	0.00149172		MXAN_2865	0	0	0.00526932		MXAN_2865	0	0	0
MXAN_1098	0	0	0.00813179		MXAN_1098	0.00317243	0	0.00197019		MXAN_1098	0	0	0.00526932		MXAN_1098	0	0	0
MXAN_1350	0	0	0.00132764		MXAN_1350	0.00317243	0	0.00177317		MXAN_1350	0	0	0.00526932		MXAN_1350	0	0	0
MXAN_2446	0	0	0.00531056		MXAN_2446	0.00312207	0	0.00247682		MXAN_2446	0	0	0.00526932		MXAN_2446	0	0	0
MXAN_4194	0	0	0.0101233		MXAN_4194	0.00292065	0	0.014692		MXAN_4194	0	0	0.00526932		MXAN_4194	0	0	0
hisB	0	0	0		hisB	0.00292065	0	0.00163245		hisB	0	0	0.00526932		hisB	0	0	0
MXAN_0749	0	0	0.00248932		MXAN_0749	0.00292065	0	0.000562913		MXAN_0749	0	0	0.00526932		MXAN_0749	0	0	0
MXAN_1522	0	0	0.00248932		MXAN_1522	0.00287029	0	0.0176473		MXAN_1522	0	0	0.00526932		MXAN_1522	0	0	0
MXAN_2459	0	0	0.0124466		MXAN_2459	0.00287029	0	0.00757118		MXAN_2459	0	0	0.00526932		MXAN_2459	0	0	0
MXAN_3105	0	0	0.0149359		MXAN_3105	0.00287029	0	0.00486919		MXAN_3105	0	0	0.00526932		MXAN_3105	0	0	0
MXAN_6256	0	0	0		MXAN_6256	0.00287029	0	0.00163245		MXAN_6256	0	0	0.00526932		MXAN_6256	0	0	0
MXAN_0731	0	0	0.0136083		MXAN_0731	0.00156103	0	0.00506621		MXAN_0731	0	0	0.00526932		MXAN_0731	0	0	0
MXAN_2507	0	0	0		MXAN_2507	0.00156103	0	0.00219536		MXAN_2507	0	0	0.00526932		MXAN_2507	0	0	0
MXAN_0566	0	0	0.00398292		MXAN_0566	0.00156103	0	0.00112583		MXAN_0566	0	0	0.00526932		MXAN_0566	0	0	0
MXAN_7171	0	0	0.0151019		MXAN_7171	0.00156103	0	0.000816223		MXAN_7171	0	0	0.00526932		MXAN_7171	0	0	0
MXAN_2332	0	0	0.00398292		MXAN_2332	0.00151068	0	0		MXAN_2332	0	0	0.00526932		MXAN_2332	0	0	0
MXAN_3098	0	0	0.0101233		MXAN_3098	0.00105748	0	0.00413741		MXAN_3098	0	0	0.00526932		MXAN_3098	0	0	0
MXAN_4062	0	0	0.00099573		MXAN_4062	0.000654628	0	0.00151986		MXAN_4062	0	0	0.00526932		MXAN_4062	0	0	0
MXAN_5508	0	0	0		MXAN_5508	0	0	0.00436257		MXAN_5508	0	0	0.00526932		MXAN_5508	0	0	0
MXAN_0941	0	0	0.00497865		MXAN_0941	0	0	0.00163245		MXAN_0941	0	0	0.00526932		MXAN_0941	0	0	0
MXAN_0418	0	0	0.00132764		MXAN_0418	0	0	0.000534767		MXAN_0418	0	0	0.00526932		MXAN_0418	0	0	0
MXAN_1008	0	0	0		MXAN_1008	0	0	0		MXAN_1008	0	0	0.00526932		MXAN_1008	0	0	0
MXAN_3175	0	0.529968	0.0165955		MXAN_3175	0.0054888	0	0.0518443		MXAN_3175	0	1.69291	0.00499199		MXAN_3175	0	0	0
MXAN_0582	0	0	0.0126126		MXAN_0582	0.00589165	0.00921796	0.0067831		MXAN_0582	0.0974433	0	0.00499199		MXAN_0582	0	0	0
MXAN_1374	0	0	0		MXAN_1374	0.00392777	0.0361628	0.000675495		MXAN_1374	0.0649622	0	0.00499199		MXAN_1374	0	0	0
MXAN_3954	0	0	0.00248932		MXAN_3954	0.056449	0.0918251	0.00104139		MXAN_3954	0	0	0.00499199		MXAN_3954	0	0	0
MXAN_1158	0	0	0.00713606		MXAN_1158	0.0222573	0.0514079	0.00205463		MXAN_1158	0	0	0.00499199		MXAN_1158	0	0	0
frr	0	0	0.00945943		frr	0.0606789	0.0340356	0.0574171		frr	0	0	0.00499199		frr	0	0	0
galU	0	0	0.00630629		galU	0.0352492	0.0272993	0.0335777		galU	0	0	0.00499199		galU	0	0	0
cglB	0	0	0.0229018		cglB	0.00699948	0.0184359	0.0215596		cglB	0	0	0.00499199		cglB	0	0	0
MXAN_5809	0	0	0.00248932		MXAN_5809	0.0131429	0.0180814	0.0215033		MXAN_5809	0	0	0.00499199		MXAN_5809	0	0	0
MXAN_3915	0	0	0.127122		MXAN_3915	0	0.0180814	0.000788078		MXAN_3915	0	0	0.00499199		MXAN_3915	0	0	0
MXAN_6498	0	0	0.00248932		MXAN_6498	0.013999	0.0173723	0.0067831		MXAN_6498	0	0	0.00499199		MXAN_6498	0	0	0
MXAN_2947	0	0	0		MXAN_2947	0.00281993	0.0173723	0.00416555		MXAN_2947	0	0	0.00499199		MXAN_2947	0	0	0
MXAN_7354	0	0	0.00713606		MXAN_7354	0.0222573	0.0170178	0.00672681		MXAN_7354	0	0	0.00499199		MXAN_7354	0	0	0
MXAN_0640	0	0	0		MXAN_0640	0.00553916	0.0170178	0.00878144		MXAN_0640	0	0	0.00499199		MXAN_0640	0	0	0
MXAN_0182	0	0	0.00547651		MXAN_0182	0.0132436	0.0106361	0.0291589		MXAN_0182	0	0	0.00499199		MXAN_0182	0	0	0
MXAN_1361	0	0	0.0084637		MXAN_1361	0.0115315	0.0095725	0.0113145		MXAN_1361	0	0	0.00499199		MXAN_1361	0	0	0
MXAN_3556	0	0	0.00896157		MXAN_3556	0.0105244	0.00921796	0.0421903		MXAN_3556	0	0	0.00499199		MXAN_3556	0	0	0
MXAN_4736	0	0	0.00132764		MXAN_4736	0.00901372	0.00921796	0.00827482		MXAN_4736	0	0	0.00499199		MXAN_4736	0	0	0
MXAN_1126	0	0	0.00132764		MXAN_1126	0.00901372	0.00921796	0		MXAN_1126	0	0	0.00499199		MXAN_1126	0	0	0
MXAN_0892	0	0	0.00132764		MXAN_0892	0.002971	0.00921796	0.00208278		MXAN_0892	0	0	0.00499199		MXAN_0892	0	0	0
MXAN_0954	0	0	0.00381696		MXAN_0954	0	0.00921796	0.00340562		MXAN_0954	0	0	0.00499199		MXAN_0954	0	0	0
MXAN_6703	0	0	0.0114509		MXAN_6703	0	0.00921796	0.00132284		MXAN_6703	0	0	0.00499199		MXAN_6703	0	0	0
MXAN_1965	0	0	0.00746797		MXAN_1965	0.00876194	0.00886343	0.00104139		MXAN_1965	0	0	0.00499199		MXAN_1965	0	0	0
MXAN_1910	0	0	0.00497865		MXAN_1910	0.00725126	0.00886343	0.000759932		MXAN_1910	0	0	0.00499199		MXAN_1910	0	0	0
moeA(2)	0	0	0.00945943		moeA(2)	0.011179	0.00638167	0.00177317		moeA(2)	0	0	0.00499199		moeA(2)	0	0	0
argD	0	0	0.0051446		argD	0.0100208	0.00638167	0.00925991		argD	0	0	0.00499199		argD	0	0	0
alaS	0	0	0.00647224		alaS	0.0128408	0.00531806	0.0136788		alaS	0	0	0.00499199		alaS	0	0	0
MXAN_3102	0	0	0.0018255		MXAN_3102	0.00523702	0.00460898	0.00503807		MXAN_3102	0	0	0.00499199		MXAN_3102	0	0	0
MXAN_3474	0	0	0.0119488		MXAN_3474	0.00518666	0.00460898	0.00706455		MXAN_3474	0	0	0.00499199		MXAN_3474	0	0	0
orn	0	0	0.00248932		orn	0.0195885	0	0.00990726		orn	0	0	0.00499199		orn	0	0	0
dsbE	0	0	0.0169274		dsbE	0.0168189	0	0.0208559		dsbE	0	0	0.00499199		dsbE	0	0	0
MXAN_5331	0	0	0.00962539		MXAN_5331	0.0111287	0	0.0217003		MXAN_5331	0	0	0.00499199		MXAN_5331	0	0	0
MXAN_0669	0	0	0.00481269		MXAN_0669	0.011028	0	0.00461588		MXAN_0669	0	0	0.00499199		MXAN_0669	0	0	0
MXAN_2676	0	0	0.0192508		MXAN_2676	0.00835909	0	0.0201523		MXAN_2676	0	0	0.00499199		MXAN_2676	0	0	0
agmI	0	0	0.00497865		agmI	0.0072009	0	0.0120182		agmI	0	0	0.00499199		agmI	0	0	0
MXAN_1890	0	0	0.00713606		MXAN_1890	0.00553916	0	0.00923177		MXAN_1890	0	0	0.00499199		MXAN_1890	0	0	0
ogt	0	0	0.0119488		ogt	0.00553916	0	0.0035745		ogt	0	0	0.00499199		ogt	0	0	0
MXAN_4393	0	0	0		MXAN_4393	0.0054888	0	0.00354635		MXAN_4393	0	0	0.00499199		MXAN_4393	0	0	0
MXAN_3957	0	0	0.00497865		MXAN_3957	0.00433061	0	0.00385595		MXAN_3957	0	0	0.00499199		MXAN_3957	0	0	0
MXAN_5584	0	0	0.00365101		MXAN_5584	0.00433061	0	0.00126655		MXAN_5584	0	0	0.00499199		MXAN_5584	0	0	0
MXAN_2156	0	0	0.00298719		MXAN_2156	0.00302136	0	0.00112583		MXAN_2156	0	0	0.00499199		MXAN_2156	0	0	0
menB	0	0	0.00248932		menB	0.002971	0	0.0131722		menB	0	0	0.00499199		menB	0	0	0
crtE	0	0	0		crtE	0.002971	0	0.00236423		crtE	0	0	0.00499199		crtE	0	0	0
MXAN_7191	0	0	0.00614033		MXAN_7191	0.00287029	0	0.000253311		MXAN_7191	0	0	0.00499199		MXAN_7191	0	0	0
MXAN_6030	0	0	0		MXAN_6030	0.00281993	0	0.00630462		MXAN_6030	0	0	0.00499199		MXAN_6030	0	0	0
rfbC	0	0	0		rfbC	0.00281993	0	0.00574171		rfbC	0	0	0.00499199		rfbC	0	0	0
MXAN_2503	0	0	0		MXAN_2503	0.00276958	0	0.0143543		MXAN_2503	0	0	0.00499199		MXAN_2503	0	0	0
hsfB	0	0	0.00265528		hsfB	0.00226602	0	0.000788078		hsfB	0	0	0.00499199		hsfB	0	0	0
MXAN_1739	0	0	0		MXAN_1739	0.00151068	0	0.00211092		MXAN_1739	0	0	0.00499199		MXAN_1739	0	0	0
MXAN_0145	0	0	0.00381696		MXAN_0145	0.00151068	0	0		MXAN_0145	0	0	0.00499199		MXAN_0145	0	0	0
MXAN_5500	0	0	0.00381696		MXAN_5500	0	0	0.00346191		MXAN_5500	0	0	0.00499199		MXAN_5500	0	0	0
MXAN_6326	0	0	0		MXAN_6326	0	0	0.00205463		MXAN_6326	0	0	0.00499199		MXAN_6326	0	0	0
MXAN_5479	0	0	0		MXAN_5479	0	0	0.00202649		MXAN_5479	0	0	0.00499199		MXAN_5479	0	0	0
MXAN_6700	0	0	0		MXAN_6700	0	0	0.00185761		MXAN_6700	0	0	0.00499199		MXAN_6700	0	0	0
MXAN_2612	0	0	0.00381696		MXAN_2612	0	0	0.00132284		MXAN_2612	0	0	0.00499199		MXAN_2612	0	0	0
MXAN_0806	0	0	0.00132764		MXAN_0806	0	0	0.0012947		MXAN_0806	0	0	0.00499199		MXAN_0806	0	0	0
truB(1)	0	0	0.00365101		truB(1)	0	0	0.00104139		truB(1)	0	0	0.00499199		truB(1)	0	0	0
MXAN_3640	0	0	0.102062		MXAN_3640	0	0	0.000844369		MXAN_3640	0	0	0.00499199		MXAN_3640	0	0	0
rhlE(1)	0	0	0.000829775		rhlE(1)	0	0	0.000703641		rhlE(1)	0	0	0.00499199		rhlE(1)	0	0	0
MXAN_2566	0	0	0.000829775		MXAN_2566	0	0	0.000534767		MXAN_2566	0	0	0.00499199		MXAN_2566	0	0	0
MXAN_6130	0	0	0.00132764		MXAN_6130	0	0	0.000253311		MXAN_6130	0	0	0.00499199		MXAN_6130	0	0	0
MXAN_0839	0	0	0		MXAN_0839	0	0	0.000168874		MXAN_0839	0	0	0.00499199		MXAN_0839	0	0	0
MXAN_2421	0	0	0.00248932		MXAN_2421	0	0	0		MXAN_2421	0	0	0.00499199		MXAN_2421	0	0	0
MXAN_3527	0	0	0.00481269		MXAN_3527	0.00755339	0.00567259	0.00149172		MXAN_3527	0.125284	0	0.00471465		MXAN_3527	0	0	0
MXAN_2001	0	0	0.00481269		MXAN_2001	0.00840945	0	0.0131159		MXAN_2001	0.0928031	0	0.00471465		MXAN_2001	0	0	0
MXAN_1943	0	0	0.00481269		MXAN_1943	0.0084598	0	0.00360264		MXAN_1943	0.0649622	0	0.00471465		MXAN_1943	0	0	0
MXAN_5886	0	0	0.00398292		MXAN_5886	0.0012589	0	0.00140728		MXAN_5886	0.0232008	0	0.00471465		MXAN_5886	0	0	0
MXAN_3110	0	0	0.00232337		MXAN_3110	0.0785553	0.0964341	0.000478476		MXAN_3110	0	0	0.00471465		MXAN_3110	0	0	0
MXAN_3367	0	0	0.00232337		MXAN_3367	0.051212	0.0662984	0.00101324		MXAN_3367	0	0	0.00471465		MXAN_3367	0	0	0
MXAN_2557	0	0	0.00365101		MXAN_2557	0.0129918	0.0489261	0.0115679		MXAN_2557	0	0	0.00471465		MXAN_2557	0	0	0
MXAN_5987	0	0	0.00464674		MXAN_5987	0.00795624	0.0326174	0.00985097		MXAN_5987	0	0	0.00471465		MXAN_5987	0	0	0
MXAN_6969	0	0	0.00448078		MXAN_6969	0.0261851	0.0322629	0.000956952		MXAN_6969	0	0	0.00471465		MXAN_6969	0	0	0
MXAN_3712	0	0	0.0144381		MXAN_3712	0.0188331	0.0233994	0.01624		MXAN_3712	0	0	0.00471465		MXAN_3712	0	0	0
MXAN_5924	0	0	0.00630629		MXAN_5924	0.00644556	0.0226904	0.00897846		MXAN_5924	0	0	0.00471465		MXAN_5924	0	0	0
MXAN_0965	0	0	0		MXAN_0965	0.00704984	0.0173723	0.00222351		MXAN_0965	0	0	0.00471465		MXAN_0965	0	0	0
MXAN_3506	0	0	0.00929348		MXAN_3506	0.0122869	0.0166632	0.0214188		MXAN_3506	0	0	0.00471465		MXAN_3506	0	0	0
MXAN_1000	0	0	0.0141062		MXAN_1000	0.0108769	0.0166632	0.0181539		MXAN_1000	0	0	0.00471465		MXAN_1000	0	0	0
MXAN_1343	0	0	0.00680415		MXAN_1343	0.0106251	0.0163087	0.00737416		MXAN_1343	0	0	0.00471465		MXAN_1343	0	0	0
MXAN_2485	0	0	0.00680415		MXAN_2485	0.00856051	0.0148906	0.00576985		MXAN_2485	0	0	0.00471465		MXAN_2485	0	0	0
MXAN_2722	0	0	0.00962539		MXAN_2722	0.00428026	0.00886343	0.00703641		MXAN_2722	0	0	0.00471465		MXAN_2722	0	0	0
MXAN_1453	0	0	0.00232337		MXAN_1453	0.019236	0.00850889	0.0278923		MXAN_1453	0	0	0.00471465		MXAN_1453	0	0	0
sppA(3)	0	0	0.00298719		sppA(3)	0.00921514	0.00709074	0.00554469		sppA(3)	0	0	0.00471465		sppA(3)	0	0	0
MXAN_4155	0	0	0.00531056		MXAN_4155	0.00956763	0.00602713	0.00565727		MXAN_4155	0	0	0.00471465		MXAN_4155	0	0	0
[truncated: 5,399 more rows]
