# Supplementary material for: The RNA cargo of Myxococcus outer membrane vesicles
Source: Royal Society of Chemistry journal article supplement (doi:10.1039/d3mo00222e), 2023-11-28
Supplement: d3mo00222e2.xlsx [file d3mo00222e2.xlsx]

## Sheet: Top 50 abundant transcripts
50 Most abundant transcripts from OMV preps 1 and 2 from AB022, CA010 and DK1622.
DK1622		AB022		CA010		#
OMV 1	OMV 2	OMV 1	OMV 2	OMV 1	OMV 2
ahpC	ahpC	ahpC	ahpC	ahpC	ahpC	6
MXAN_4815	MXAN_4815	MXAN_4815	MXAN_4815	MXAN_4815	MXAN_4815	6
MXAN_0934	MXAN_0934		MXAN_0934	MXAN_0934	MXAN_0934	5
MXAN_1563	MXAN_1563	MXAN_1563	MXAN_1563	MXAN_1563		5
MXAN_0457	MXAN_0457	MXAN_0457	MXAN_0457			4
	rpsO	rpsO	rpsO	rpsO		4
	MXAN_6754	MXAN_6754	MXAN_6754	MXAN_6754		4
		etfA	etfA		etfA	3
MXAN_1562		MXAN_1562	MXAN_1562			3
	MXAN_2650	MXAN_2650	MXAN_2650			3
		MXAN_2720	MXAN_2720	MXAN_2720		3
		MXAN_2990	MXAN_2990	MXAN_2990		3
		MXAN_3345	MXAN_3345	MXAN_3345		3
MXAN_3850	MXAN_3850		MXAN_3850			3
rplL	rplL	rplL				3
		rplU	rplU	rplU		3
	rpmA	rpmA	rpmA			3
rpsU	rpsU	rpsU				3
tuf(1)				tuf(1)	tuf(1)	3
		atpE		atpE		2
			clpX		clpX	2
		cspA	cspA			2
		cspD		cspD		2
				dnaK	dnaK	2
		etfB	etfB			2
				fibA	fibA	2
				groEL(1)	groEL(1)	2
				groEL(2)	groEL(2)	2
				groES	groES	2
		MXAN_0380	MXAN_0380			2
	MXAN_0452			MXAN_0452		2
MXAN_0670					MXAN_0670	2
		MXAN_1380	MXAN_1380			2
				MXAN_1449	MXAN_1449	2
		MXAN_1532	MXAN_1532			2
				MXAN_2627	MXAN_2627	2
		MXAN_2718	MXAN_2718			2
		MXAN_2719	MXAN_2719			2
	MXAN_2963	MXAN_2963				2
	MXAN_3175				MXAN_3175	2
		MXAN_3758	MXAN_3758			2
		MXAN_4033	MXAN_4033			2
	MXAN_4137				MXAN_4137	2
MXAN_4355	MXAN_4355					2
MXAN_4859	MXAN_4859					2
		MXAN_4956		MXAN_4956		2
		MXAN_5169			MXAN_5169	2
				MXAN_5485	MXAN_5485	2
				MXAN_5582	MXAN_5582	2
MXAN_5845	MXAN_5845					2
MXAN_6282	MXAN_6282					2
		MXAN_6302	MXAN_6302			2
	MXAN_6720			MXAN_6720		2
				rplS	rplS	2
rplW			rplW			2
	rpmD			rpmD		2
		rpmG(2)		rpmG(2)		2
rpsE		rpsE				2
rpsI				rpsI		2
rpsM	rpsM					2
secG				secG		2
		sigC	sigC			2
		trx(1)	trx(1)			2
		tuf(2)		tuf(2)		2
		acpP(2)				1
					batB	1
ccoP						1
					clpP(2)	1
		cspC				1
	dapA					1
era						1
					gapA	1
					glyQ	1
	hppD					1
					icd	1
					ilvE	1
				infA		1
					lpdA	1
			mrpC			1
msrB						1
		MXAN_0132				1
					MXAN_0133	1
			MXAN_0287			1
					MXAN_0414	1
			MXAN_0425			1
				MXAN_0777		1
			MXAN_0809			1
					MXAN_0837	1
MXAN_0977						1
			MXAN_0994			1
MXAN_1086						1
			MXAN_1101			1
	MXAN_1176					1
MXAN_1366						1
				MXAN_1384		1
			MXAN_1486			1
			MXAN_1618			1
	MXAN_1717					1
				MXAN_1931		1
	MXAN_1991					1
			MXAN_2083			1
MXAN_2134						1
	MXAN_2438					1
	MXAN_2591					1
	MXAN_2634					1
				MXAN_2836		1
		MXAN_2855				1
MXAN_2905						1
					MXAN_2967	1
			MXAN_2978			1
				MXAN_2979		1
			MXAN_3079			1
MXAN_3201						1
			MXAN_3227			1
			MXAN_3228			1
				MXAN_3546		1
MXAN_3639						1
				MXAN_3665		1
				MXAN_3699		1
					MXAN_3703	1
MXAN_3789						1
MXAN_3790						1
					MXAN_3830	1
			MXAN_4043			1
		MXAN_4095				1
				MXAN_4124		1
					MXAN_4295	1
			MXAN_4332			1
MXAN_4524						1
	MXAN_4357					1
	MXAN_4361					1
				MXAN_4453		1
	MXAN_4668					1
	MXAN_4809					1
	MXAN_4816					1
	MXAN_4896					1
				MXAN_4985		1
MXAN_5033						1
MXAN_5040						1
				MXAN_5074		1
MXAN_5088						1
					MXAN_5101	1
				MXAN_5121		1
					MXAN_5330	1
					MXAN_5366	1
					MXAN_5372	1
MXAN_5561						1
	MXAN_5594					1
				MXAN_5725		1
					MXAN_5792	1
	MXAN_5858					1
					MXAN_6034	1
	MXAN_6089					1
	MXAN_6128					1
				MXAN_6440		1
MXAN_6535						1
					MXAN_6541	1
MXAN_6622						1
	MXAN_6704					1
					MXAN_6767	1
			MXAN_6862			1
			MXAN_6880			1
MXAN_6978						1
					MXAN_7085	1
			MXAN_7203			1
					MXAN_7317	1
MXAN_7340						1
	MXAN_7352					1
	MXAN_7407					1
MXAN_7475						1
MXAN_7502						1
	ndk					1
pdhC						1
pilA						1
					rimM	1
			rnk			1
				rplC		1
				rplD		1
rplI						1
rplJ						1
	rplK					1
		rplO				1
		rplP				1
		rplX				1
		rpmB(1)				1
		rpmC				1
			rpmE			1
		rpmH				1
		rpmJ				1
rpsC						1
rpsD						1
				rpsF		1
	rpsG					1
rpsK						1
		rpsL				1
		rpsQ				1
	sdhB					1
					serS	1
	slyD					1
					sodB	1
					sucB	1
	sucD					1
					tgl	1
					trxB(1)	1
